# Supplementary material
Source: PubMed Central journal article supplement (PMC3107868)
Supplement: NIHMS290430-supplement-1_si_001.pdf [file NIHMS290430-supplement-1_si_001.pdf]

# CamKII

## MS/MS of peptide KLVpTYLASVPSEDVCK

OT10-3482 #3221 RT: 37.23 AV: 1 NL: 1.69E4  
 T: ITMS + c NSI d Full ms2 916.44@cid35.00 [240.00-1845.00]

| b-H <sub>3</sub> PO <sub>4</sub> | b-H <sub>3</sub> PO <sub>4</sub> <sup>+2</sup> | b         | b <sup>+2</sup> |    | y    | y <sup>+2</sup> | y-H <sub>3</sub> PO <sub>4</sub> | y-H <sub>3</sub> PO <sub>4</sub> <sup>+2</sup> |          |
|----------------------------------|------------------------------------------------|-----------|-----------------|----|------|-----------------|----------------------------------|------------------------------------------------|----------|
| ---                              | ---                                            | ---       | ---             | 1  | K 16 | ---             | ---                              | ---                                            |          |
| ---                              | ---                                            | 242.1863  | 121.5968        | 2  | L 15 | 1703.7962       | 852.4017                         | 1605.8193                                      | 803.4133 |
| ---                              | ---                                            | 341.2547  | 171.1310        | 3  | V 14 | 1590.7121       | 795.8597                         | 1492.7352                                      | 746.8712 |
| 424.2918                         | 212.6496                                       | 522.2687  | 261.6380        | 4  | t 13 | 1491.6437       | 746.3255                         | 1393.6668                                      | 697.3370 |
| 587.3552                         | 294.1812                                       | 685.3321  | 343.1697        | 5  | Y 12 | 1310.6297       | 655.8185                         | ---                                            | ---      |
| 700.4392                         | 350.7233                                       | 798.4161  | 399.7117        | 6  | L 11 | 1147.5664       | 574.2868                         | ---                                            | ---      |
| 771.4763                         | 386.2418                                       | 869.4532  | 435.2303        | 7  | A 10 | 1034.4823       | 517.7448                         | ---                                            | ---      |
| 858.5084                         | 429.7578                                       | 956.4853  | 478.7463        | 8  | S 9  | 963.4452        | 482.2262                         | ---                                            | ---      |
| 957.5768                         | 479.2920                                       | 1055.5537 | 528.2805        | 9  | V 8  | 876.4131        | 438.7102                         | ---                                            | ---      |
| 1054.6295                        | 527.8184                                       | 1152.6064 | 576.8069        | 10 | P 7  | 777.3447        | 389.1760                         | ---                                            | ---      |
| 1141.6616                        | 571.3344                                       | 1239.6385 | 620.3229        | 11 | S 6  | 680.2920        | 340.6496                         | ---                                            | ---      |
| 1270.7042                        | 635.8557                                       | 1368.6811 | 684.8442        | 12 | E 5  | 593.2599        | 297.1336                         | ---                                            | ---      |
| 1385.7311                        | 693.3692                                       | 1483.7080 | 742.3576        | 13 | D 4  | 464.2173        | 232.6123                         | ---                                            | ---      |
| 1484.7995                        | 742.9034                                       | 1582.7764 | 791.8918        | 14 | V 3  | 349.1904        | 175.0988                         | ---                                            | ---      |
| 1587.8087                        | 794.4080                                       | 1685.7856 | 843.3964        | 15 | C 2  | 250.1220        | 125.5646                         | ---                                            | ---      |
| ---                              | ---                                            | ---       | ---             | 16 | K 1  | 147.1128        | 74.0600                          | ---                                            | ---      |

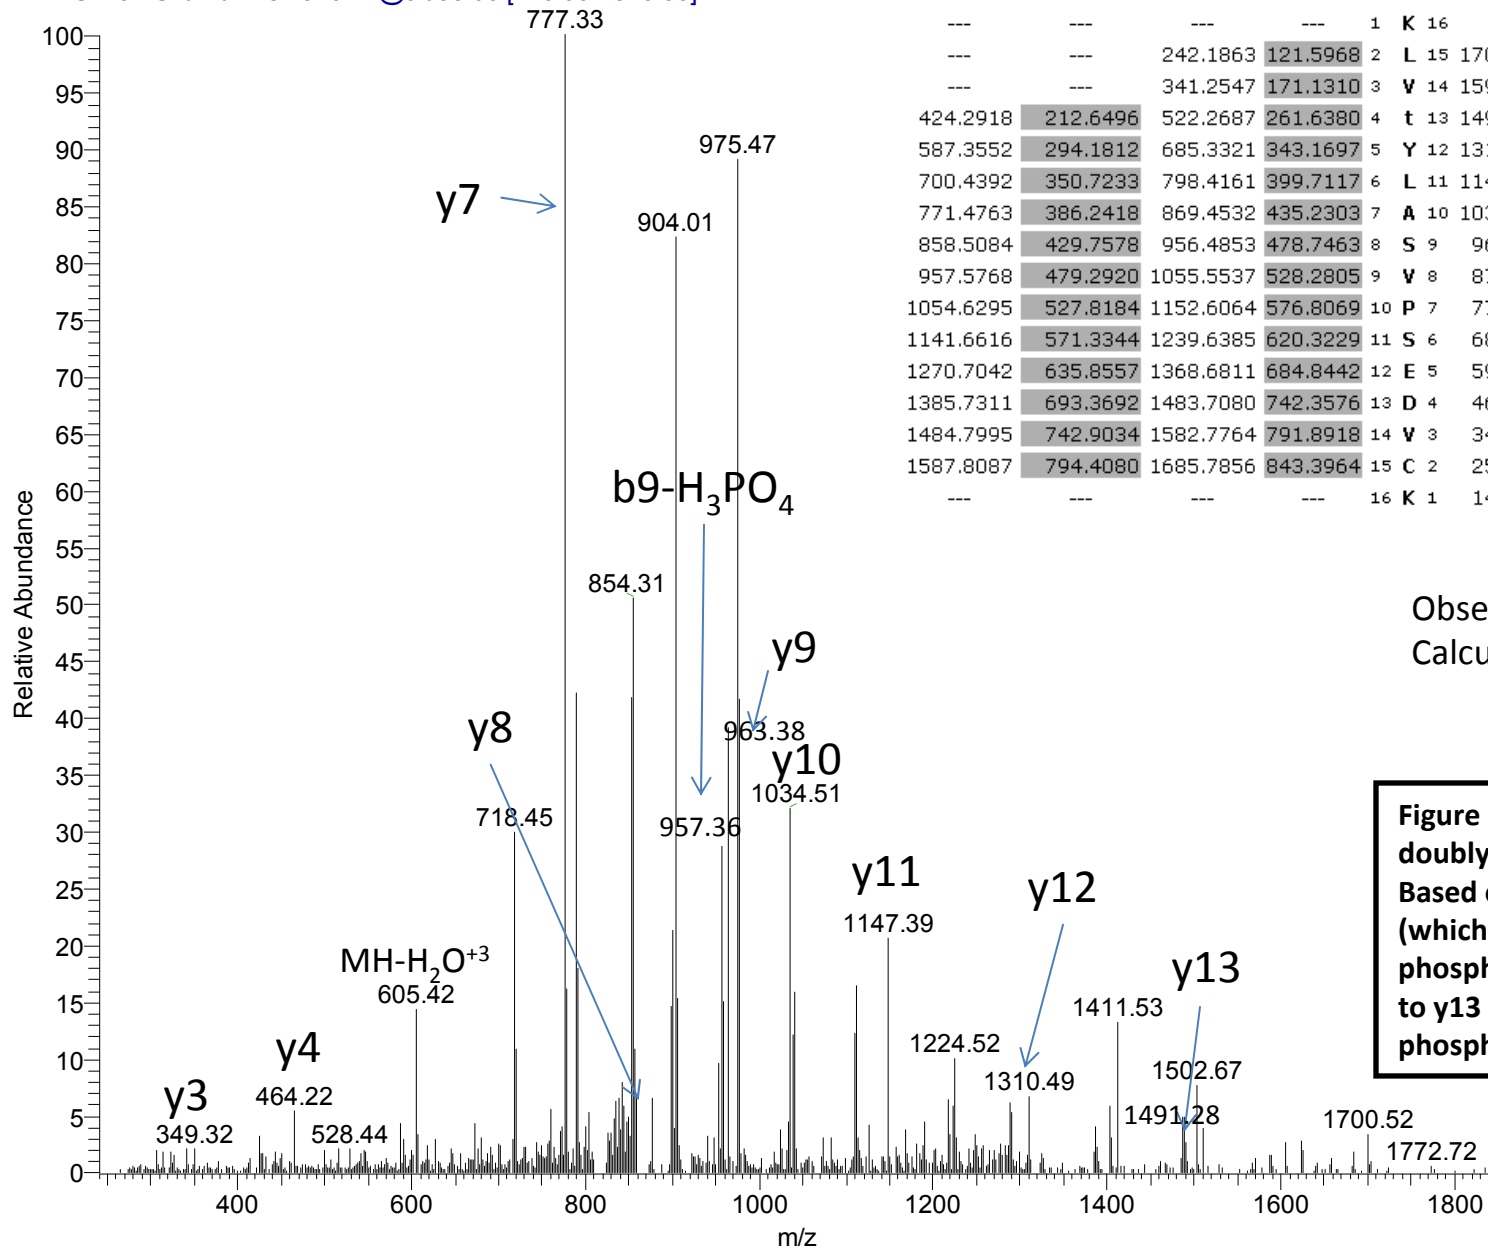

Observed M=1830.8685  
 Calculated M=1830.8838

**Figure S1. MS/MS on the doubly charged 916.44 ion. Based on the intact mass (which indicated 1 site of phosphorylation) and the y10 to y13 ions, residue 79 is a phosphothreonine.**

# CamKII

# MS/MS of peptide LVTYLA<sup>p</sup>SVPS<sup>S</sup>EDVCKR

OT10-3482 #3180 RT: 36.95 AV: 1 NL: 9.98E4  
 T: ITMS + c NSI d Full ms2 931.45@cid35.00 [245.00-1875.00]

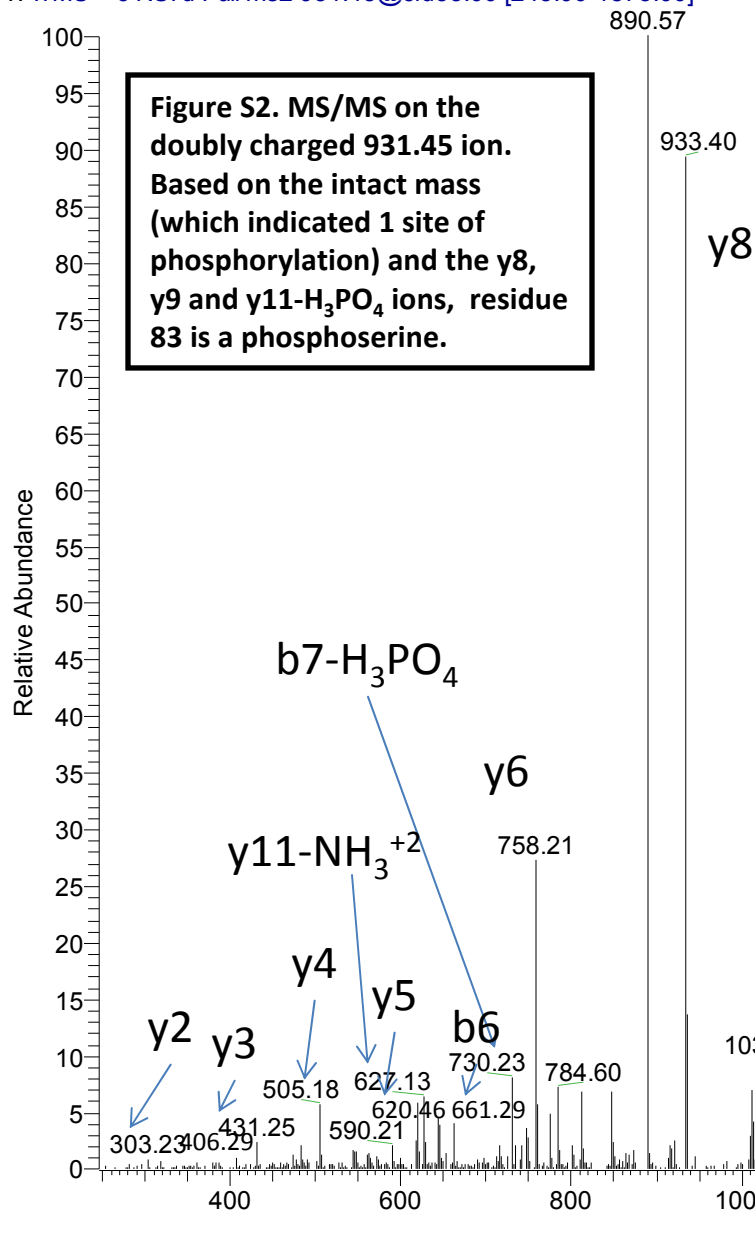

**Figure S2. MS/MS on the doubly charged 931.45 ion. Based on the intact mass (which indicated 1 site of phosphorylation) and the y8, y9 and y11-H<sub>3</sub>PO<sub>4</sub> ions, residue 83 is a phosphoserine.**

| b-H <sub>3</sub> PO <sub>4</sub> | b-H <sub>3</sub> PO <sub>4</sub> <sup>+2</sup> | b         | b <sup>+2</sup> |    | y    | y <sup>+2</sup> | y-H <sub>3</sub> PO <sub>4</sub> | y-H <sub>3</sub> PO <sub>4</sub> <sup>+2</sup> |          |
|----------------------------------|------------------------------------------------|-----------|-----------------|----|------|-----------------|----------------------------------|------------------------------------------------|----------|
| ---                              | ---                                            | ---       | ---             | 1  | L 16 | ---             | ---                              | ---                                            |          |
| ---                              | ---                                            | 213.1598  | 107.0835        | 2  | V 15 | 1746.8132       | 873.9102                         | 1648.8363                                      | 824.9218 |
| ---                              | ---                                            | 314.2074  | 157.6074        | 3  | T 14 | 1647.7448       | 824.3760                         | 1549.7679                                      | 775.3876 |
| ---                              | ---                                            | 477.2708  | 239.1390        | 4  | Y 13 | 1546.6971       | 773.8522                         | 1448.7202                                      | 724.8638 |
| ---                              | ---                                            | 590.3548  | 295.6811        | 5  | L 12 | 1383.6338       | 692.3205                         | 1285.6569                                      | 643.3321 |
| ---                              | ---                                            | 661.3919  | 331.1996        | 6  | A 11 | 1270.5497       | 635.7785                         | 1172.5728                                      | 586.7901 |
| 730.4134                         | 365.7103                                       | 828.3903  | 414.6988        | 7  | S 10 | 1199.5126       | 600.2599                         | 1101.5357                                      | 551.2715 |
| 829.4818                         | 415.2445                                       | 927.4587  | 464.2330        | 8  | V 9  | 1032.5143       | 516.7608                         | ---                                            | ---      |
| 926.5346                         | 463.7709                                       | 1024.5115 | 512.7594        | 9  | P 8  | 933.4458        | 467.2266                         | ---                                            | ---      |
| 1013.5666                        | 507.2869                                       | 1111.5435 | 556.2754        | 10 | S 7  | 836.3931        | 418.7002                         | ---                                            | ---      |
| 1142.6092                        | 571.8082                                       | 1240.5861 | 620.7967        | 11 | E 6  | 749.3610        | 375.1842                         | ---                                            | ---      |
| 1257.6361                        | 629.3217                                       | 1355.6130 | 678.3102        | 12 | D 5  | 620.3185        | 310.6629                         | ---                                            | ---      |
| 1356.7046                        | 678.8559                                       | 1454.6815 | 727.8444        | 13 | V 4  | 505.2915        | 253.1494                         | ---                                            | ---      |
| 1459.7137                        | 730.3605                                       | 1557.6906 | 779.3490        | 14 | C 3  | 406.2231        | 203.6152                         | ---                                            | ---      |
| 1587.8087                        | 794.4080                                       | 1685.7856 | 843.3964        | 15 | K 2  | 303.2139        | 152.1106                         | ---                                            | ---      |
| ---                              | ---                                            | ---       | ---             | 16 | R 1  | 175.1190        | 88.0631                          | ---                                            | ---      |

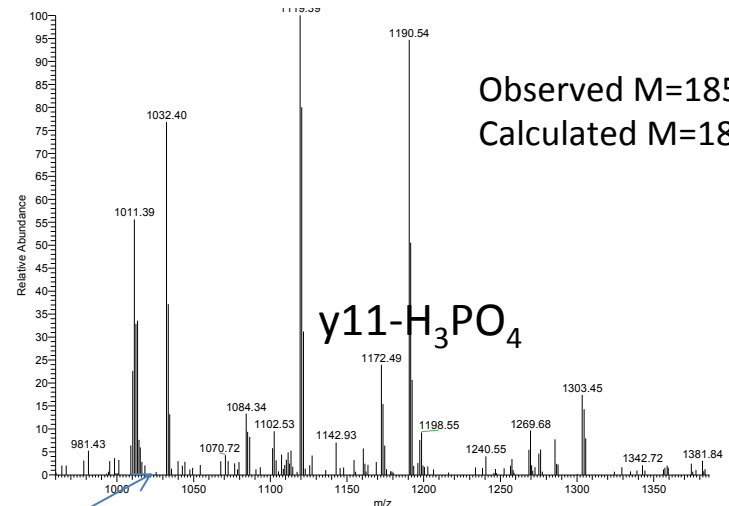

Observed M=1858.8736  
 Calculated M=1858.8900

# CamKII

## MS/MS of peptide pT/pSEQVCSVLESLEQYR

OT10-3482 #4297 RT: 45.66 AV: 1 NL: 1.91E5  
 T: ITMS + c NSI d Full ms2 693.98@cid35.00 [180.00-2000.00]

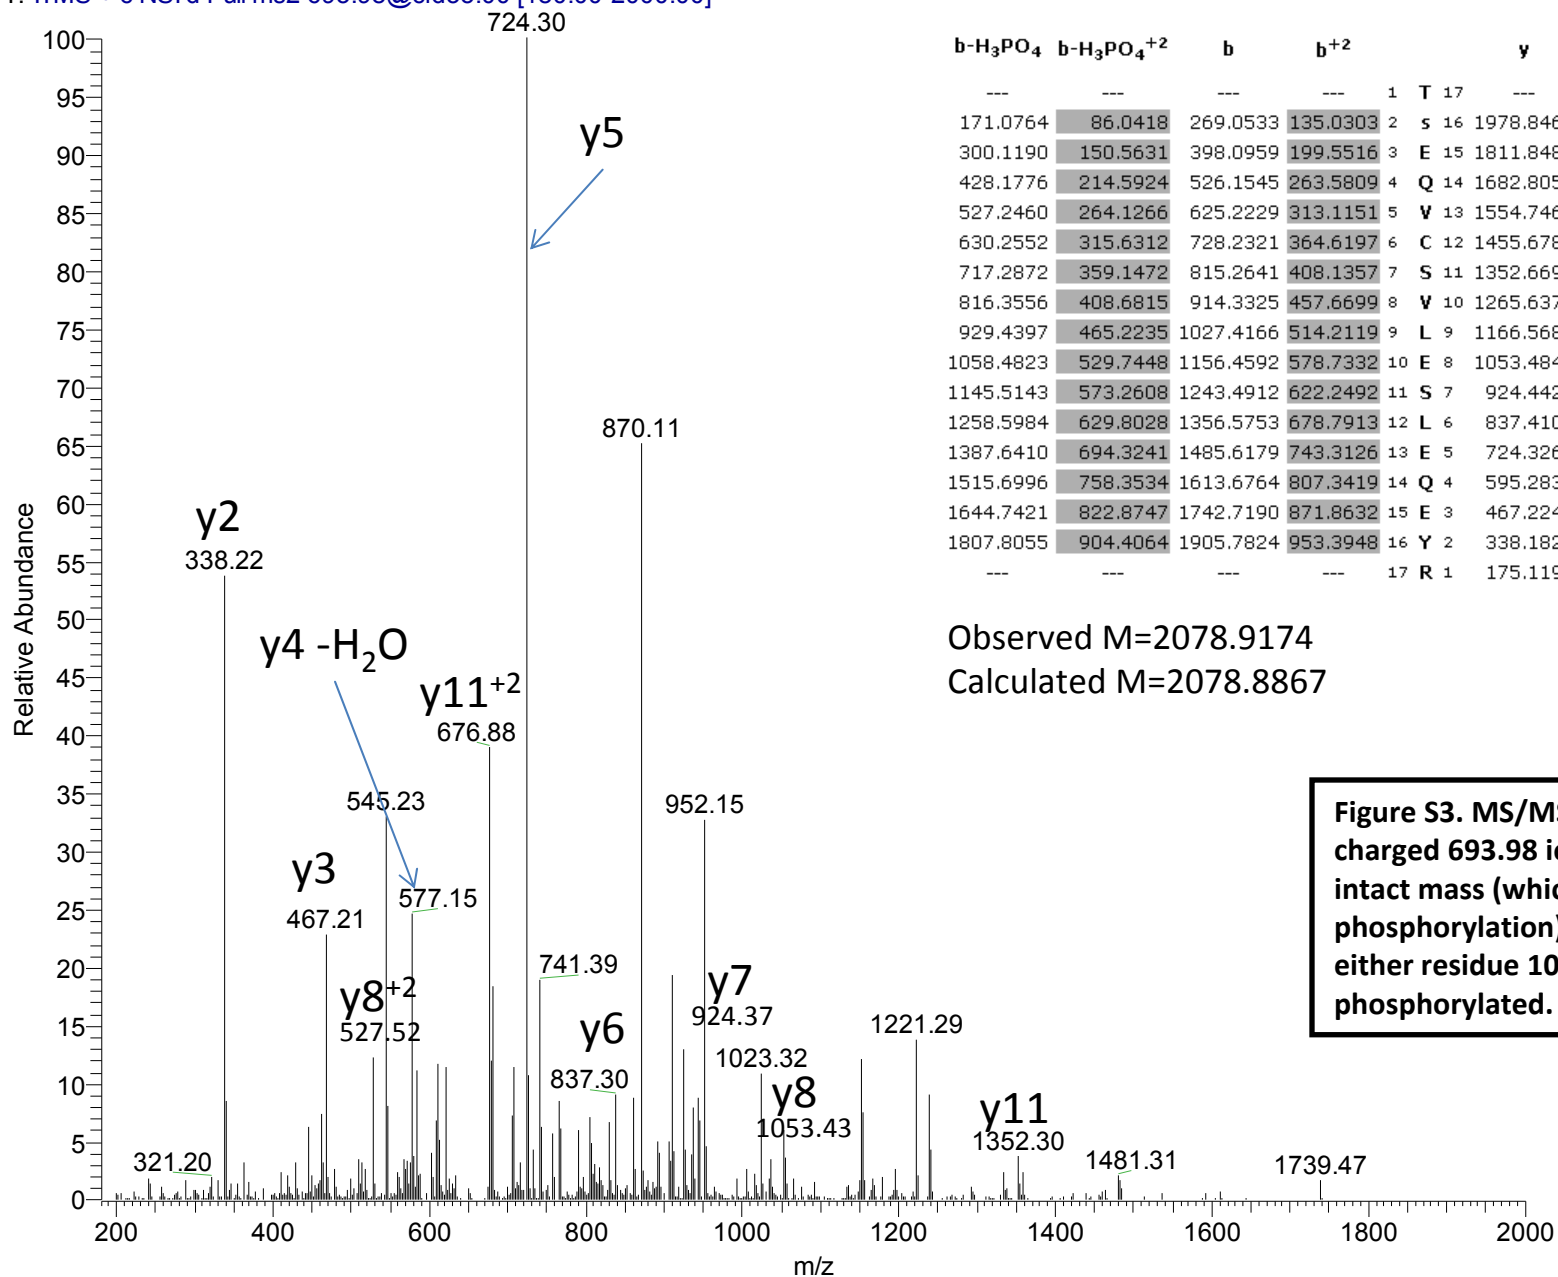

| b-H <sub>3</sub> PO <sub>4</sub> | b-H <sub>3</sub> PO <sub>4</sub> +2 | b         | b+2      |    | y    | y+2       | y-H <sub>3</sub> PO <sub>4</sub> | y-H <sub>3</sub> PO <sub>4</sub> +2 |
|----------------------------------|-------------------------------------|-----------|----------|----|------|-----------|----------------------------------|-------------------------------------|
| ---                              | ---                                 | ---       | ---      | 1  | T 17 | ---       | ---                              | ---                                 |
| 171.0764                         | 86.0418                             | 269.0533  | 135.0303 | 2  | s 16 | 1978.8464 | 989.9268                         | 1880.8695                           |
| 300.1190                         | 150.5631                            | 398.0959  | 199.5516 | 3  | E 15 | 1811.8480 | 906.4276                         | ---                                 |
| 428.1776                         | 214.5924                            | 526.1545  | 263.5809 | 4  | Q 14 | 1682.8054 | 841.9063                         | ---                                 |
| 527.2460                         | 264.1266                            | 625.2229  | 313.1151 | 5  | V 13 | 1554.7468 | 777.8771                         | ---                                 |
| 630.2552                         | 315.6312                            | 728.2321  | 364.6197 | 6  | C 12 | 1455.6784 | 728.3428                         | ---                                 |
| 717.2872                         | 359.1472                            | 815.2641  | 408.1357 | 7  | S 11 | 1352.6692 | 676.8383                         | ---                                 |
| 816.3556                         | 408.6815                            | 914.3325  | 457.6699 | 8  | V 10 | 1265.6372 | 633.3222                         | ---                                 |
| 929.4397                         | 465.2235                            | 1027.4166 | 514.2119 | 9  | L 9  | 1166.5688 | 583.7880                         | ---                                 |
| 1058.4823                        | 529.7448                            | 1156.4592 | 578.7332 | 10 | E 8  | 1053.4847 | 527.2460                         | ---                                 |
| 1145.5143                        | 573.2608                            | 1243.4912 | 622.2492 | 11 | S 7  | 924.4421  | 462.7247                         | ---                                 |
| 1258.5984                        | 629.8028                            | 1356.5753 | 678.7913 | 12 | L 6  | 837.4101  | 419.2087                         | ---                                 |
| 1387.6410                        | 694.3241                            | 1485.6179 | 743.3126 | 13 | E 5  | 724.3260  | 362.6667                         | ---                                 |
| 1515.6996                        | 758.3534                            | 1613.6764 | 807.3419 | 14 | Q 4  | 595.2835  | 298.1454                         | ---                                 |
| 1644.7421                        | 822.8747                            | 1742.7190 | 871.8632 | 15 | E 3  | 467.2249  | 234.1161                         | ---                                 |
| 1807.8055                        | 904.4064                            | 1905.7824 | 953.3948 | 16 | Y 2  | 338.1823  | 169.5948                         | ---                                 |
| ---                              | ---                                 | ---       | ---      | 17 | R 1  | 175.1190  | 88.0631                          | ---                                 |

Observed M=2078.9174  
 Calculated M=2078.8867

**Figure S3. MS/MS on the triply charged 693.98 ion. Based on the intact mass (which indicated 1 site of phosphorylation) and the y ions, either residue 1002 or 1003 is phosphorylated.**

# CamKII

## MS/MS of peptide GFTVIIDMR

OT10-3482 #3773 RT: 41.58 AV: 1 NL: 3.32E4

T: ITMS + c NSI d Full ms2 526.28@cid35.00 [130.00-1065.00]

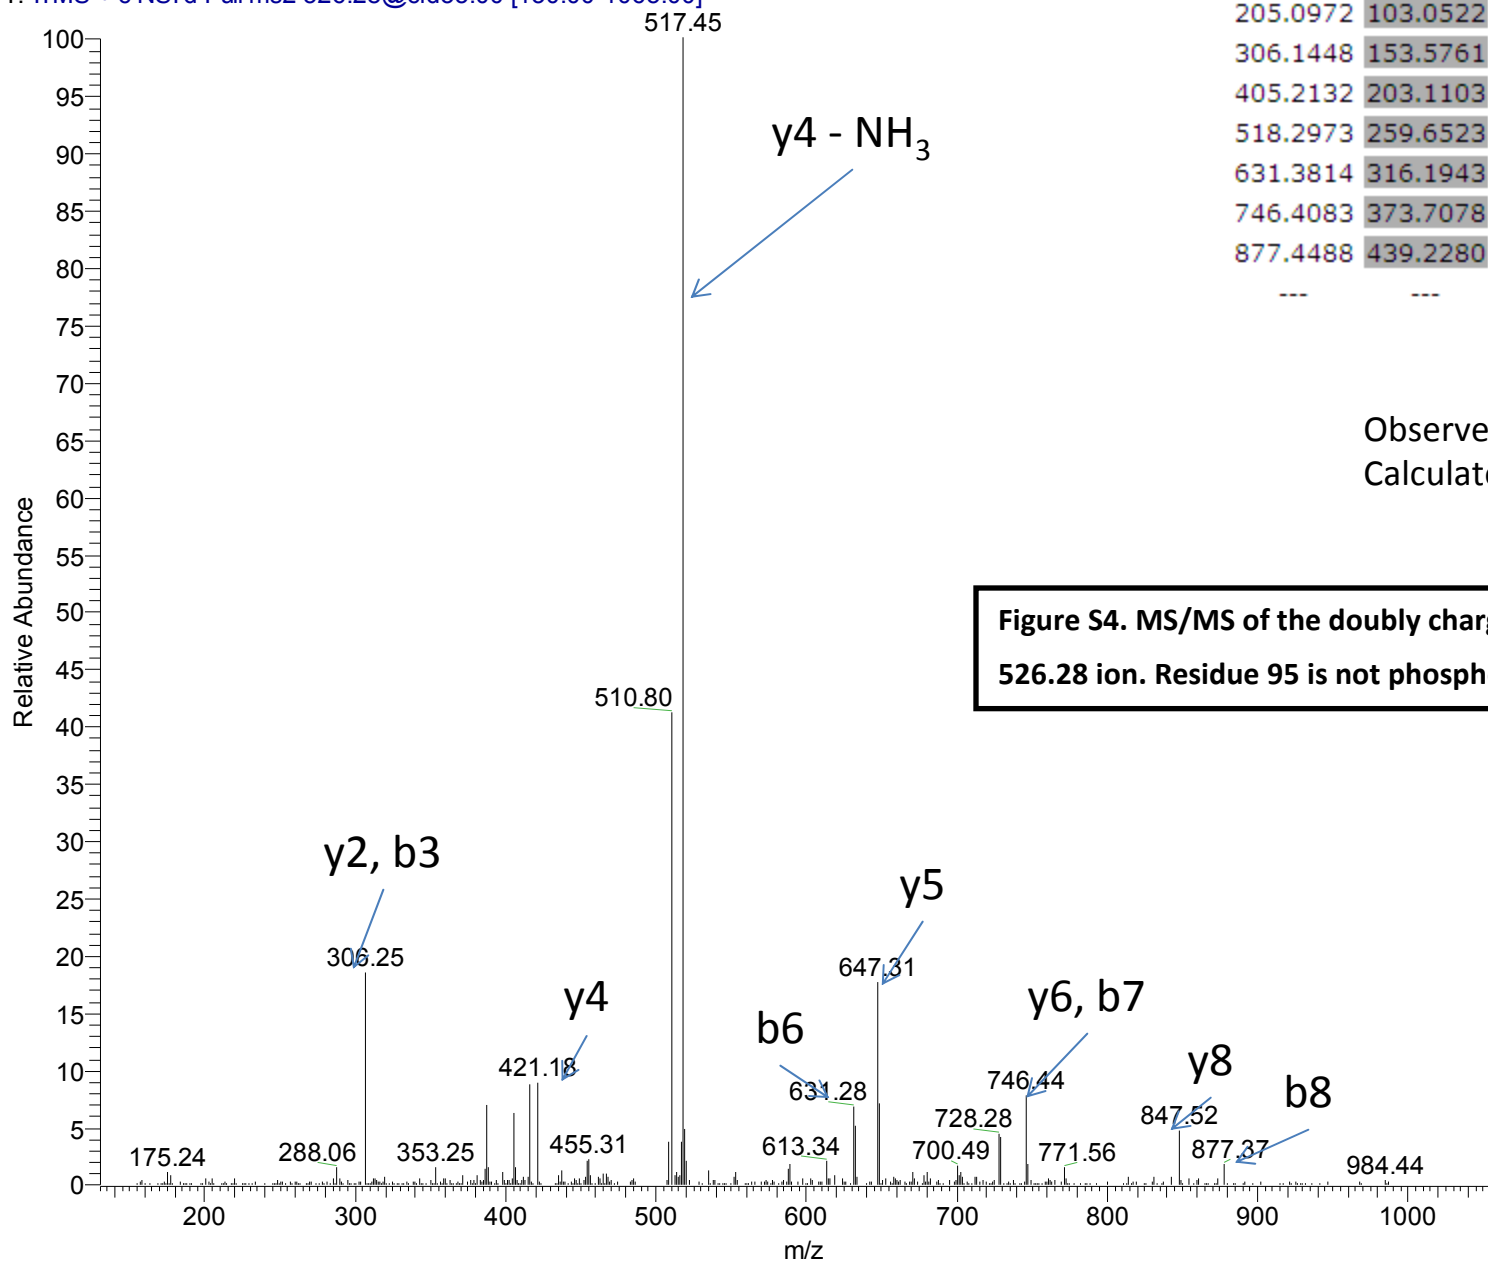

| b        | b <sup>+</sup> | y     | y <sup>+</sup> |
|----------|----------------|-------|----------------|
| ---      | ---            | 1 G 9 | ---            |
| 205.0972 | 103.0522       | 2 F 8 | 994.5390       |
| 306.1448 | 153.5761       | 3 T 7 | 847.4706       |
| 405.2132 | 203.1103       | 4 V 6 | 746.4229       |
| 518.2973 | 259.6523       | 5 I 5 | 647.3545       |
| 631.3814 | 316.1943       | 6 I 4 | 534.2704       |
| 746.4083 | 373.7078       | 7 D 3 | 421.1864       |
| 877.4488 | 439.2280       | 8 M 2 | 306.1594       |
| ---      | ---            | 9 R 1 | 175.1190       |

Observed M=1050.5511  
Calculated M=1050.5532

Figure S4. MS/MS of the doubly charged 526.28 ion. Residue 95 is not phosphorylated.

**PKA**

**MS/MS of peptide KLVpTYLASVPSEDVCK**

OT10-3486 #3221 RT: 37.38 AV: 1 NL: 1.13E4  
 T: ITMS + c NSI d Full ms2 916.94@cid35.00 [240.00-1845.00]

| b-H <sub>3</sub> PO <sub>4</sub> | b-H <sub>3</sub> PO <sub>4</sub> +2 | b         | b+2      |    | y | y+2 | y-H <sub>3</sub> PO <sub>4</sub> | y-H <sub>3</sub> PO <sub>4</sub> +2 |
|----------------------------------|-------------------------------------|-----------|----------|----|---|-----|----------------------------------|-------------------------------------|
| ---                              | ---                                 | ---       | ---      | 1  | K | 16  | ---                              | ---                                 |
| ---                              | ---                                 | 242.1863  | 121.5968 | 2  | L | 15  | 1703.7962                        | 852.4017                            |
| ---                              | ---                                 | 341.2547  | 171.1310 | 3  | V | 14  | 1590.7121                        | 795.8597                            |
| 424.2918                         | 212.6496                            | 522.2687  | 261.6380 | 4  | t | 13  | 1491.6437                        | 746.3255                            |
| 587.3552                         | 294.1812                            | 685.3321  | 343.1697 | 5  | Y | 12  | 1310.6297                        | 655.8185                            |
| 700.4392                         | 350.7233                            | 798.4161  | 399.7117 | 6  | L | 11  | 1147.5664                        | 574.2868                            |
| 771.4763                         | 386.2418                            | 869.4532  | 435.2303 | 7  | A | 10  | 1034.4823                        | 517.7448                            |
| 858.5084                         | 429.7578                            | 956.4853  | 478.7463 | 8  | S | 9   | 963.4452                         | 482.2262                            |
| 957.5768                         | 479.2920                            | 1055.5537 | 528.2805 | 9  | V | 8   | 876.4131                         | 438.7102                            |
| 1054.6295                        | 527.8184                            | 1152.6064 | 576.8069 | 10 | P | 7   | 777.3447                         | 389.1760                            |
| 1141.6616                        | 571.3344                            | 1239.6385 | 620.3229 | 11 | S | 6   | 680.2920                         | 340.6496                            |
| 1270.7042                        | 635.8557                            | 1368.6811 | 684.8442 | 12 | E | 5   | 593.2599                         | 297.1336                            |
| 1385.7311                        | 693.3692                            | 1483.7080 | 742.3576 | 13 | D | 4   | 464.2173                         | 232.6123                            |
| 1484.7995                        | 742.9034                            | 1582.7764 | 791.8918 | 14 | V | 3   | 349.1904                         | 175.0988                            |
| 1587.8087                        | 794.4080                            | 1685.7856 | 843.3964 | 15 | C | 2   | 250.1220                         | 125.5646                            |
| ---                              | ---                                 | ---       | ---      | 16 | K | 1   | 147.1128                         | 74.0600                             |

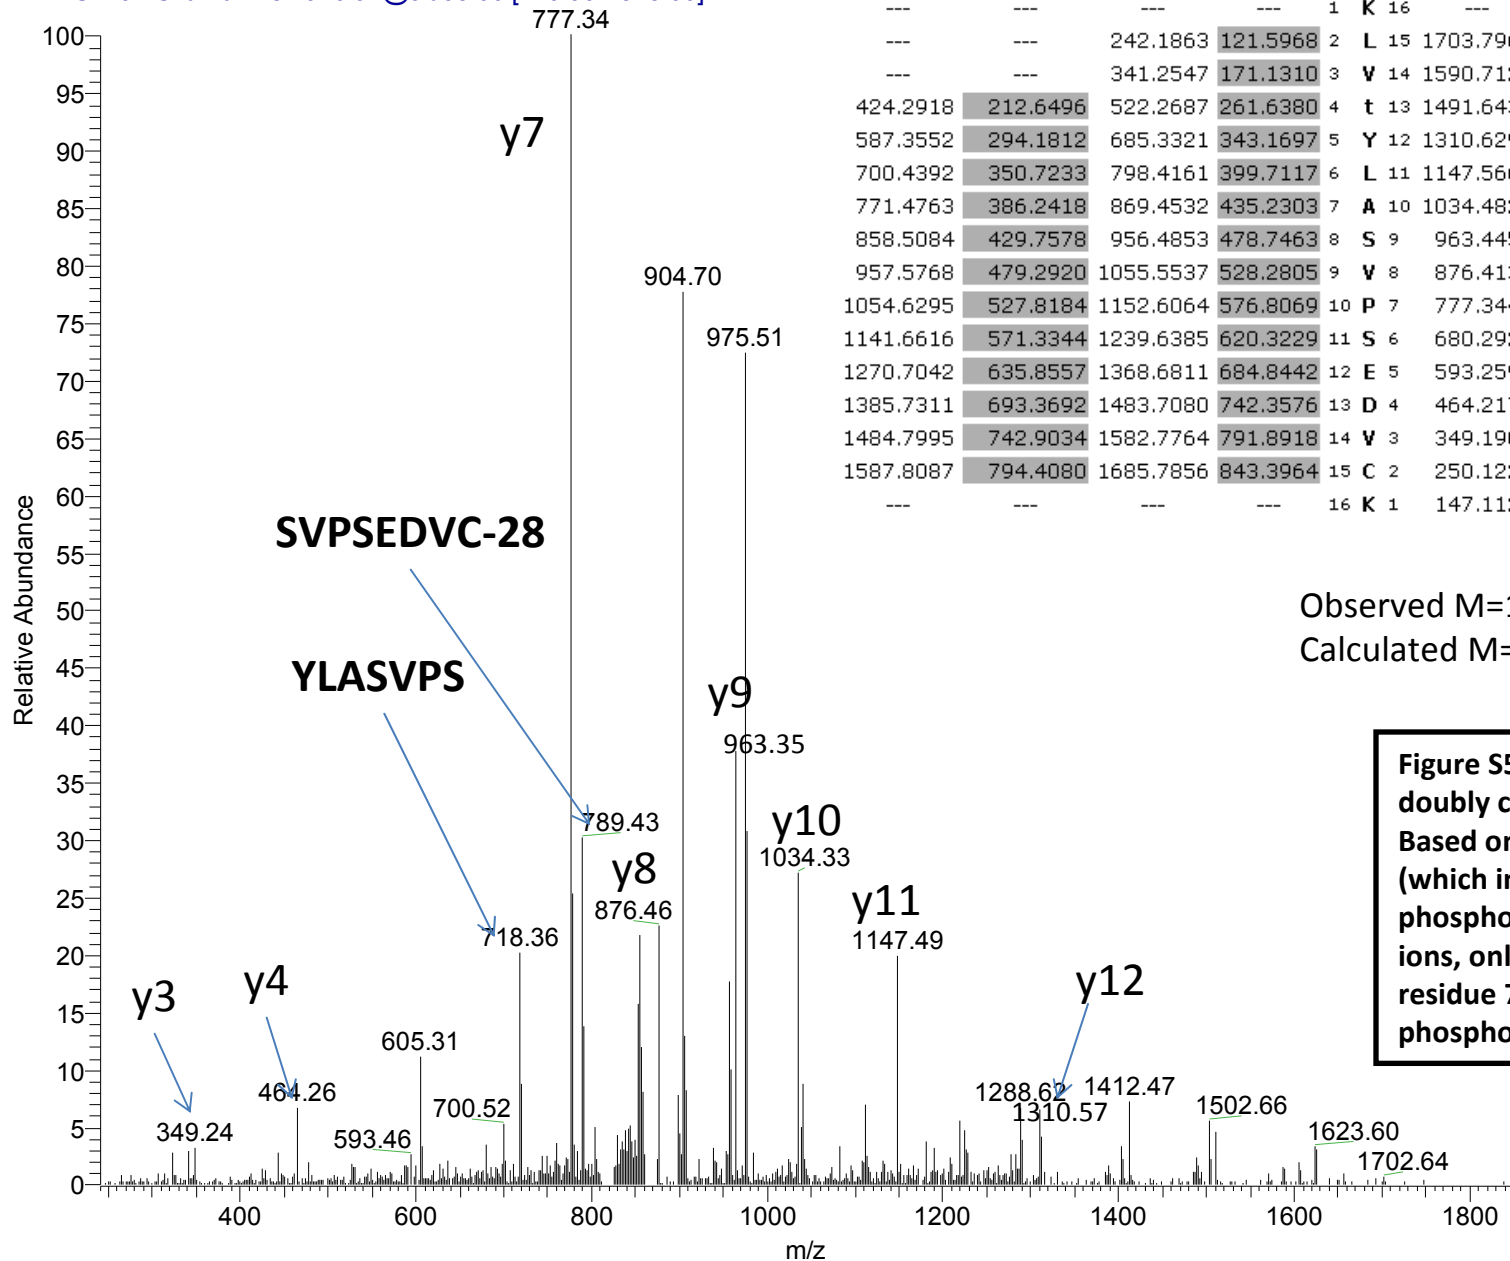

Observed M=1830.8690  
 Calculated M=1830.8838

Figure S5. MS/MS on the doubly charged 916.94 ion. Based on the intact mass (which indicated 1 site of phosphorylation) and the y ions, only the threonine at residue 79 can be phosphorylated.

**PKA**

**MS/MS of peptide LVTYLA<sup>p</sup>SVPSE<sup>D</sup>VCKR**

OT10-3486 #3176 RT: 37.04 AV: 1 NL: 2.73E4  
 T: ITMS + c NSI d Full ms2 930.44@cid35.00 [245.00-1875.00]

|  | b-H <sub>3</sub> PO <sub>4</sub> | b-H <sub>3</sub> PO <sub>4</sub> <sup>+2</sup> | b         | b <sup>+2</sup> |    | y    | y <sup>+2</sup> | y-H <sub>3</sub> PO <sub>4</sub> | y-H <sub>3</sub> PO <sub>4</sub> <sup>+2</sup> |          |
|--|----------------------------------|------------------------------------------------|-----------|-----------------|----|------|-----------------|----------------------------------|------------------------------------------------|----------|
|  | ---                              | ---                                            | ---       | ---             | 1  | L 16 | ---             | ---                              | ---                                            |          |
|  | ---                              | ---                                            | 213.1598  | 107.0835        | 2  | V 15 | 1746.8132       | 873.9102                         | 1648.8363                                      | 824.9218 |
|  | ---                              | ---                                            | 314.2074  | 157.6074        | 3  | T 14 | 1647.7448       | 824.3760                         | 1549.7679                                      | 775.3876 |
|  | ---                              | ---                                            | 477.2708  | 239.1390        | 4  | Y 13 | 1546.6971       | 773.8522                         | 1448.7202                                      | 724.8638 |
|  | ---                              | ---                                            | 590.3548  | 295.6811        | 5  | L 12 | 1383.6338       | 692.3205                         | 1285.6569                                      | 643.3321 |
|  | ---                              | ---                                            | 661.3919  | 331.1996        | 6  | A 11 | 1270.5497       | 635.7785                         | 1172.5728                                      | 586.7901 |
|  | 730.4134                         | 365.7103                                       | 828.3903  | 414.6988        | 7  | s 10 | 1199.5126       | 600.2599                         | 1101.5357                                      | 551.2715 |
|  | 829.4818                         | 415.2445                                       | 927.4587  | 464.2330        | 8  | V 9  | 1032.5143       | 516.7608                         | ---                                            | ---      |
|  | 926.5346                         | 463.7709                                       | 1024.5115 | 512.7594        | 9  | P 8  | 933.4458        | 467.2266                         | ---                                            | ---      |
|  | 1013.5666                        | 507.2869                                       | 1111.5435 | 556.2754        | 10 | S 7  | 836.3931        | 418.7002                         | ---                                            | ---      |
|  | 1142.6092                        | 571.8082                                       | 1240.5861 | 620.7967        | 11 | E 6  | 749.3610        | 375.1842                         | ---                                            | ---      |
|  | 1257.6361                        | 629.3217                                       | 1355.6130 | 678.3102        | 12 | D 5  | 620.3185        | 310.6629                         | ---                                            | ---      |
|  | 1356.7046                        | 678.8559                                       | 1454.6815 | 727.8444        | 13 | V 4  | 505.2915        | 253.1494                         | ---                                            | ---      |
|  | 1459.7137                        | 730.3605                                       | 1557.6906 | 779.3490        | 14 | C 3  | 406.2231        | 203.6152                         | ---                                            | ---      |
|  | 1587.8087                        | 794.4080                                       | 1685.7856 | 843.3964        | 15 | K 2  | 303.2139        | 152.1106                         | ---                                            | ---      |
|  | ---                              | ---                                            | ---       | ---             | 16 | R 1  | 175.1190        | 88.0631                          | ---                                            | ---      |

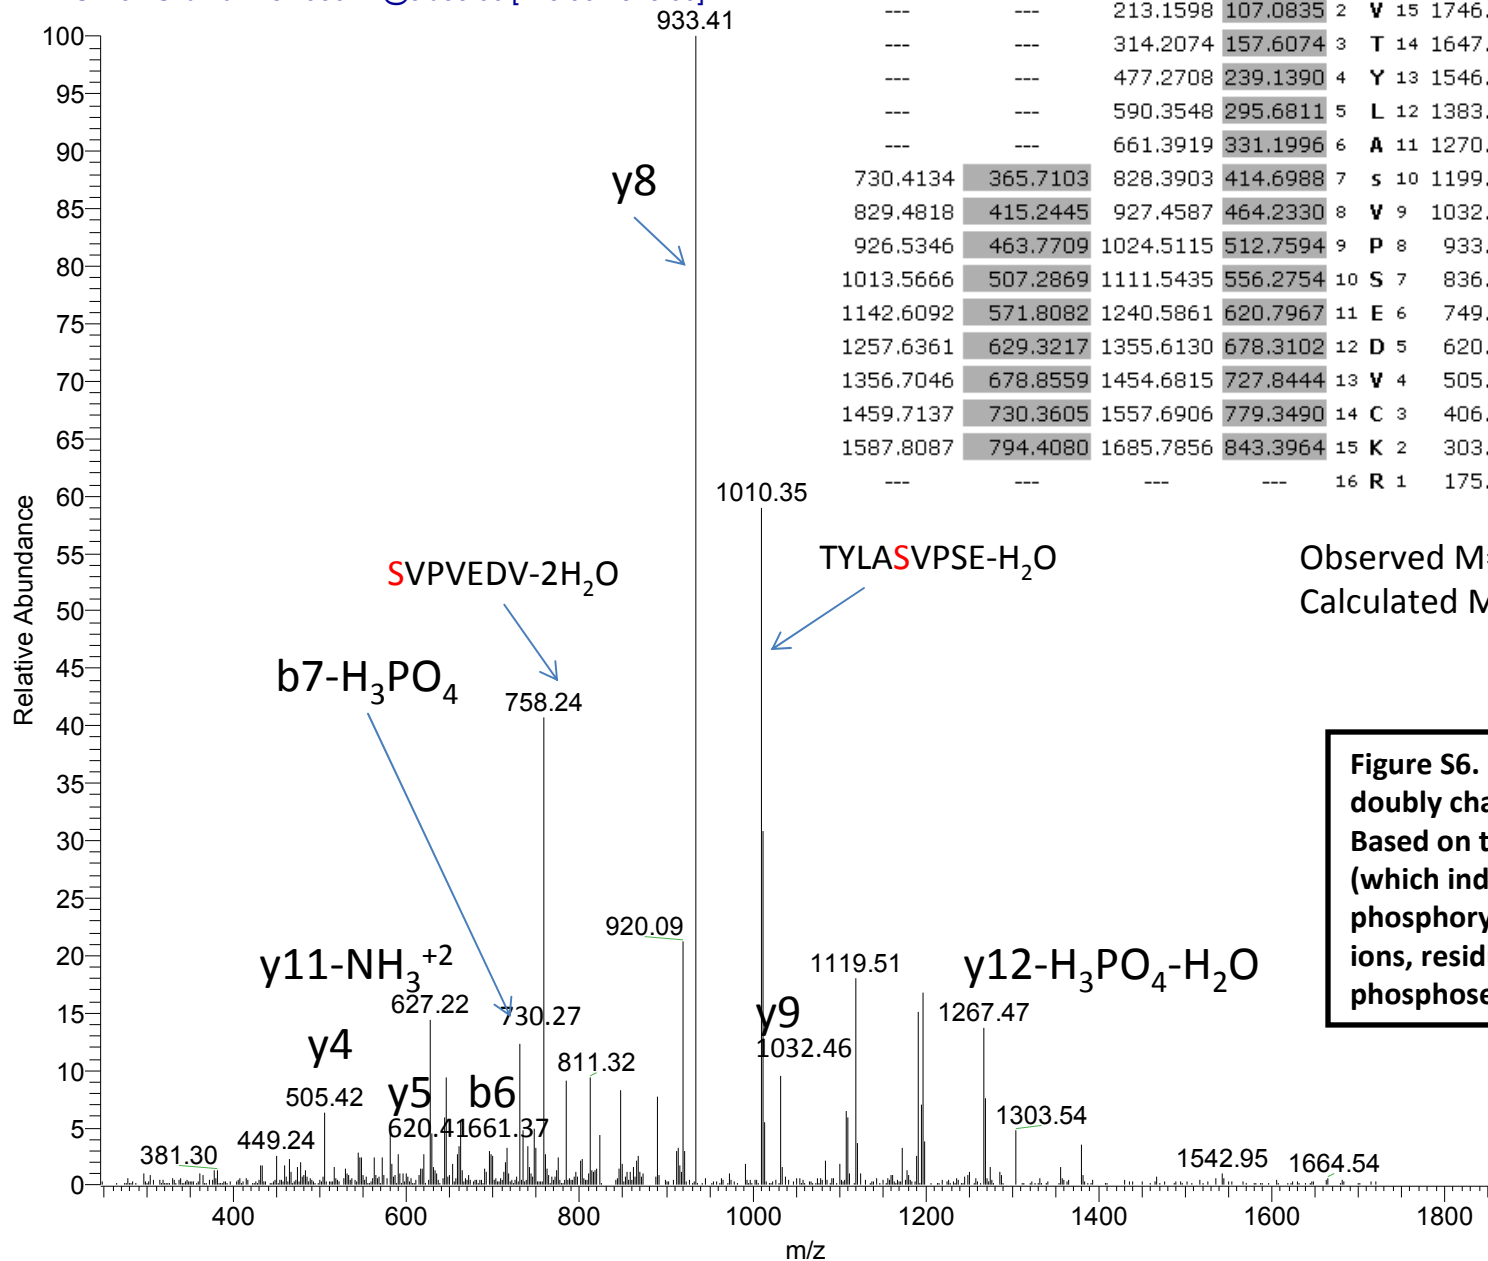

Observed M=1858.8751  
 Calculated M=1858.8900

**Figure S6. MS/MS on the doubly charged 930.44 ion. Based on the intact mass (which indicated 1 site of phosphorylation) and the y ions, residue 83 is a phosphoserine.**

**PKC**

**MS/MS of peptide KLVpTYLASVPSEDVCK**

OT10-3470 #3256 RT: 37.31 AV: 1 NL: 1.65E4  
 T: ITMS + c NSI d Full ms2 916.44@cid35.00 [240.00-1845.00]

| b-H <sub>3</sub> PO <sub>4</sub> | b-H <sub>3</sub> PO <sub>4</sub> +2 | b         | b+2      |        | y         | y+2      | y-H <sub>3</sub> PO <sub>4</sub> | y-H <sub>3</sub> PO <sub>4</sub> +2 |
|----------------------------------|-------------------------------------|-----------|----------|--------|-----------|----------|----------------------------------|-------------------------------------|
| ---                              | ---                                 | ---       | ---      | 1 K 16 | ---       | ---      | ---                              | ---                                 |
| ---                              | ---                                 | 242.1863  | 121.5968 | 2 L 15 | 1703.7962 | 852.4017 | 1605.8193                        | 803.4133                            |
| ---                              | ---                                 | 341.2547  | 171.1310 | 3 V 14 | 1590.7121 | 795.8597 | 1492.7352                        | 746.8712                            |
| 424.2918                         | 212.6496                            | 522.2687  | 261.6380 | 4 t 13 | 1491.6437 | 746.3255 | 1393.6668                        | 697.3370                            |
| 587.3552                         | 294.1812                            | 685.3321  | 343.1697 | 5 Y 12 | 1310.6297 | 655.8185 | ---                              | ---                                 |
| 700.4392                         | 350.7233                            | 798.4161  | 399.7117 | 6 L 11 | 1147.5664 | 574.2868 | ---                              | ---                                 |
| 771.4763                         | 386.2418                            | 869.4532  | 435.2303 | 7 A 10 | 1034.4823 | 517.7448 | ---                              | ---                                 |
| 858.5084                         | 429.7578                            | 956.4853  | 478.7463 | 8 S 9  | 963.4452  | 482.2262 | ---                              | ---                                 |
| 957.5768                         | 479.2920                            | 1055.5537 | 528.2805 | 9 V 8  | 876.4131  | 438.7102 | ---                              | ---                                 |
| 1054.6295                        | 527.8184                            | 1152.6064 | 576.8069 | 10 P 7 | 777.3447  | 389.1760 | ---                              | ---                                 |
| 1141.6616                        | 571.3344                            | 1239.6385 | 620.3229 | 11 S 6 | 680.2920  | 340.6496 | ---                              | ---                                 |
| 1270.7042                        | 635.8557                            | 1368.6811 | 684.8442 | 12 E 5 | 593.2599  | 297.1336 | ---                              | ---                                 |
| 1385.7311                        | 693.3692                            | 1483.7080 | 742.3576 | 13 D 4 | 464.2173  | 232.6123 | ---                              | ---                                 |
| 1484.7995                        | 742.9034                            | 1582.7764 | 791.8918 | 14 V 3 | 349.1904  | 175.0988 | ---                              | ---                                 |
| 1587.8087                        | 794.4080                            | 1685.7856 | 843.3964 | 15 C 2 | 250.1220  | 125.5646 | ---                              | ---                                 |
| ---                              | ---                                 | ---       | ---      | 16 K 1 | 147.1128  | 74.0600  | ---                              | ---                                 |

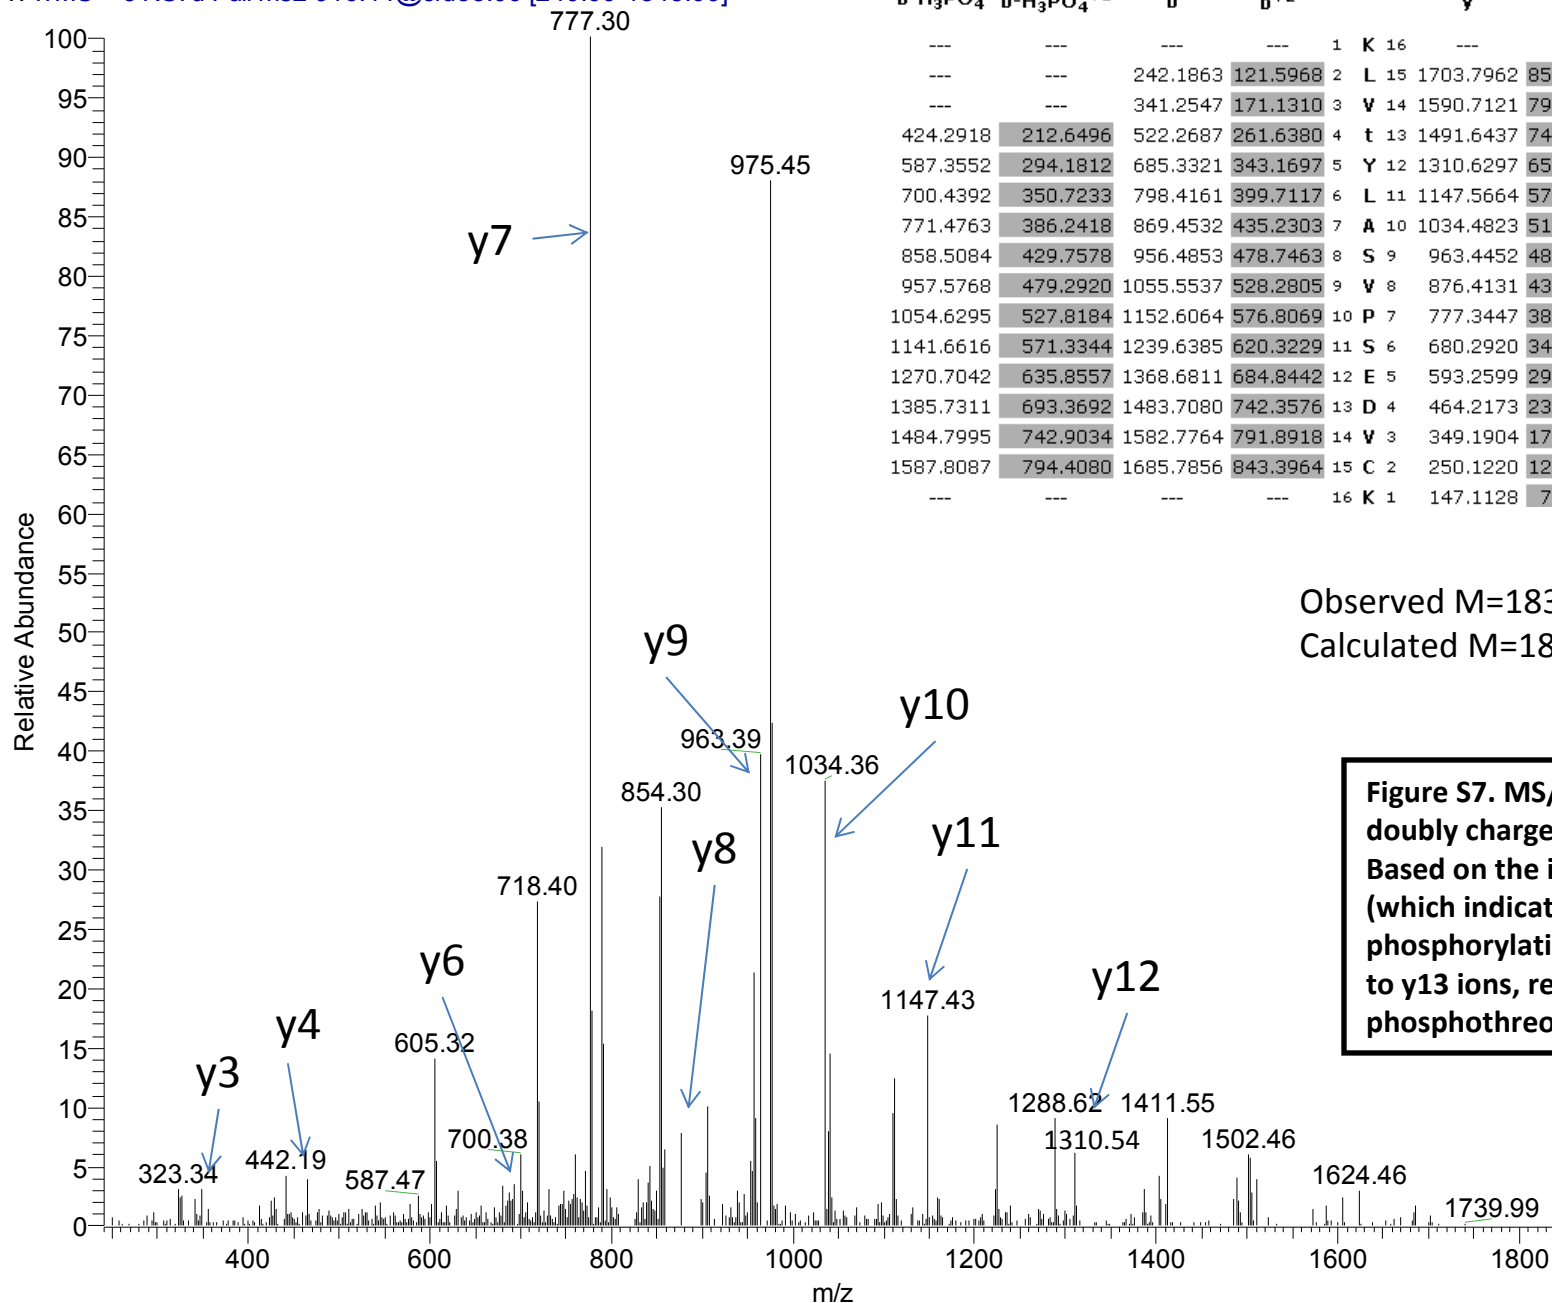

**Figure S7. MS/MS on the doubly charged 916.44 ion. Based on the intact mass (which indicated 1 site of phosphorylation) and the y10 to y13 ions, residue 79 is a phosphothreonine.**

PKC

# MS/MS of peptide LVTYLA<sup>p</sup>SVPS<sup>ED</sup>VCKR

OT10-3470 #3220 RT: 37.05 AV: 1 NL: 9.50E4  
T: ITMS + c NSI d Full ms2 930.44@cid35.00 [245.00-1875.00]

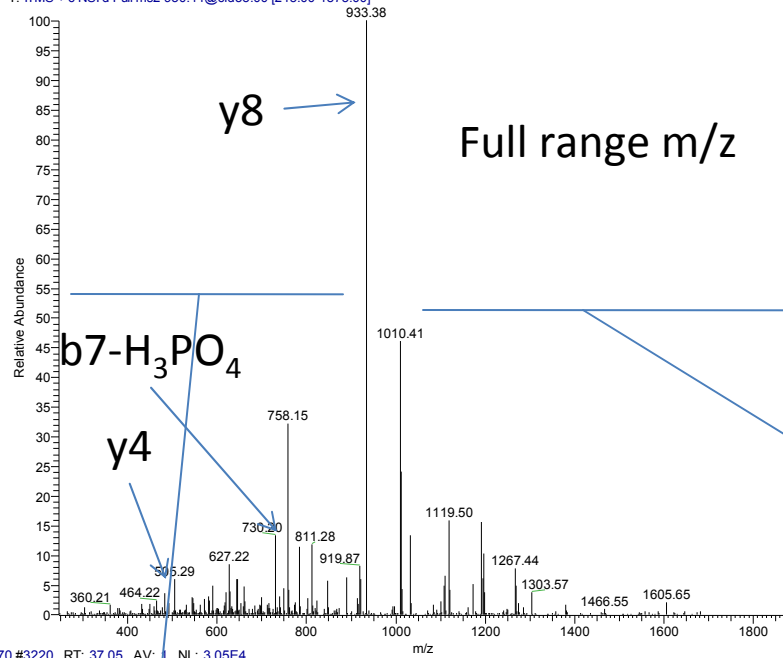

| b-H <sub>3</sub> PO <sub>4</sub> | b-H <sub>3</sub> PO <sub>4</sub> <sup>+2</sup> | b         | b <sup>+2</sup> | y      | y <sup>+2</sup> | y-H <sub>3</sub> PO <sub>4</sub> | y-H <sub>3</sub> PO <sub>4</sub> <sup>+2</sup> |          |
|----------------------------------|------------------------------------------------|-----------|-----------------|--------|-----------------|----------------------------------|------------------------------------------------|----------|
| ---                              | ---                                            | ---       | ---             | 1 L 16 | ---             | ---                              | ---                                            |          |
| ---                              | ---                                            | 213.1598  | 107.0835        | 2 V 15 | 1746.8132       | 873.9102                         | 1648.8363                                      | 824.9218 |
| ---                              | ---                                            | 314.2074  | 157.6074        | 3 T 14 | 1647.7448       | 824.3760                         | 1549.7679                                      | 775.3876 |
| ---                              | ---                                            | 477.2708  | 239.1390        | 4 Y 13 | 1546.6971       | 773.8522                         | 1448.7202                                      | 724.8638 |
| ---                              | ---                                            | 590.3548  | 295.6811        | 5 L 12 | 1383.6338       | 692.3205                         | 1285.6569                                      | 643.3321 |
| ---                              | ---                                            | 661.3919  | 331.1996        | 6 A 11 | 1270.5497       | 635.7785                         | 1172.5728                                      | 586.7901 |
| 730.4134                         | 365.7103                                       | 828.3903  | 414.6988        | 7 S 10 | 1199.5126       | 600.2599                         | 1101.5357                                      | 551.2715 |
| 829.4818                         | 415.2445                                       | 927.4587  | 464.2330        | 8 V 9  | 1032.5143       | 516.7608                         | ---                                            | ---      |
| 926.5346                         | 463.7709                                       | 1024.5115 | 512.7594        | 9 P 8  | 933.4458        | 467.2266                         | ---                                            | ---      |
| 1013.5666                        | 507.2869                                       | 1111.5435 | 556.2754        | 10 S 7 | 836.3931        | 418.7002                         | ---                                            | ---      |
| 1142.6092                        | 571.8082                                       | 1240.5861 | 620.7967        | 11 E 6 | 749.3610        | 375.1842                         | ---                                            | ---      |
| 1257.6361                        | 629.3217                                       | 1355.6130 | 678.3102        | 12 D 5 | 620.3185        | 310.6629                         | ---                                            | ---      |
| 1356.7046                        | 678.8559                                       | 1454.6815 | 727.8444        | 13 V 4 | 505.2915        | 253.1494                         | ---                                            | ---      |
| 1459.7137                        | 730.3605                                       | 1557.6906 | 779.3490        | 14 C 3 | 406.2231        | 203.6152                         | ---                                            | ---      |
| 1587.8087                        | 794.4080                                       | 1685.7856 | 843.3964        | 15 K 2 | 303.2139        | 152.1106                         | ---                                            | ---      |
| ---                              | ---                                            | ---       | ---             | 16 R 1 | 175.1190        | 88.0631                          | ---                                            | ---      |

Observed M=1858.8723  
Calculated M=1858.8900

OT10-3470 #3220 RT: 37.05 AV: 1 NL: 3.05E4  
T: ITMS + c NSI d Full ms2 930.44@cid35.00 [245.00-1875.00]

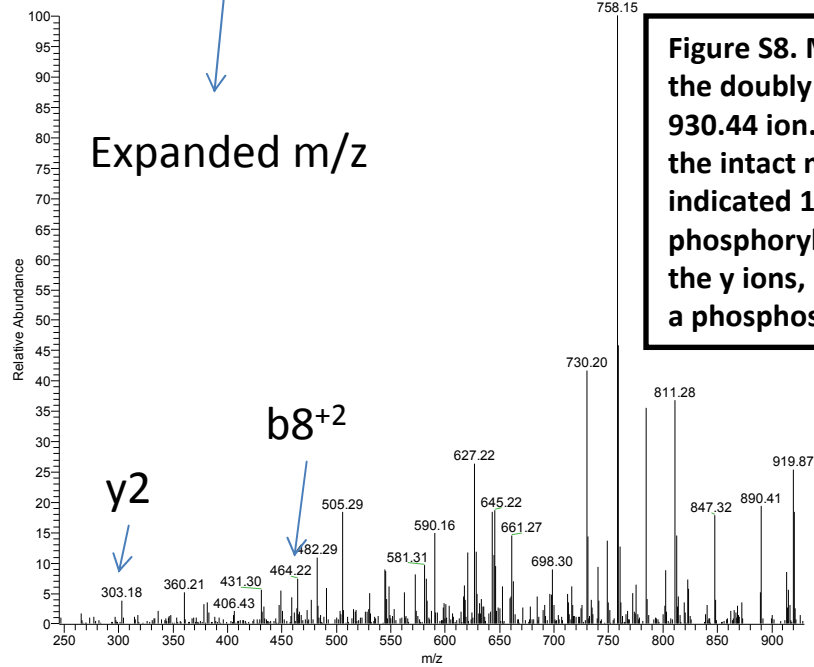

Figure S8. MS/MS on the doubly charged 930.44 ion. Based on the intact mass (which indicated 1 site of phosphorylation) and the y ions, residue 83 is a phosphoserine.

OT10-3470 #3220 RT: 37.05 AV: 1 NL: 4.38E4  
T: ITMS + c NSI d Full ms2 930.44@cid35.00 [245.00-1875.00]

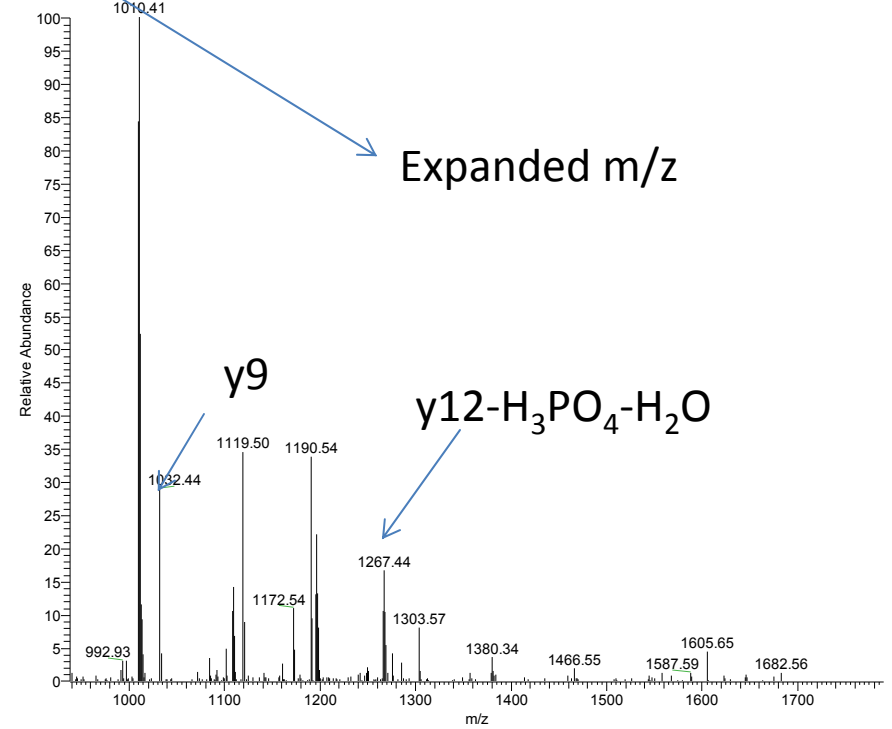



**PKC**

**MS/MS of peptide LLT<sub>p</sub>SELGVTEHVEGDPCK**

OT10-3470 #3170 RT: 36.64 AV: 1 NL: 4.47E4  
 T: ITMS + c NSI d Full ms2 1004.95@cid35.00 [265.00-2000.00]

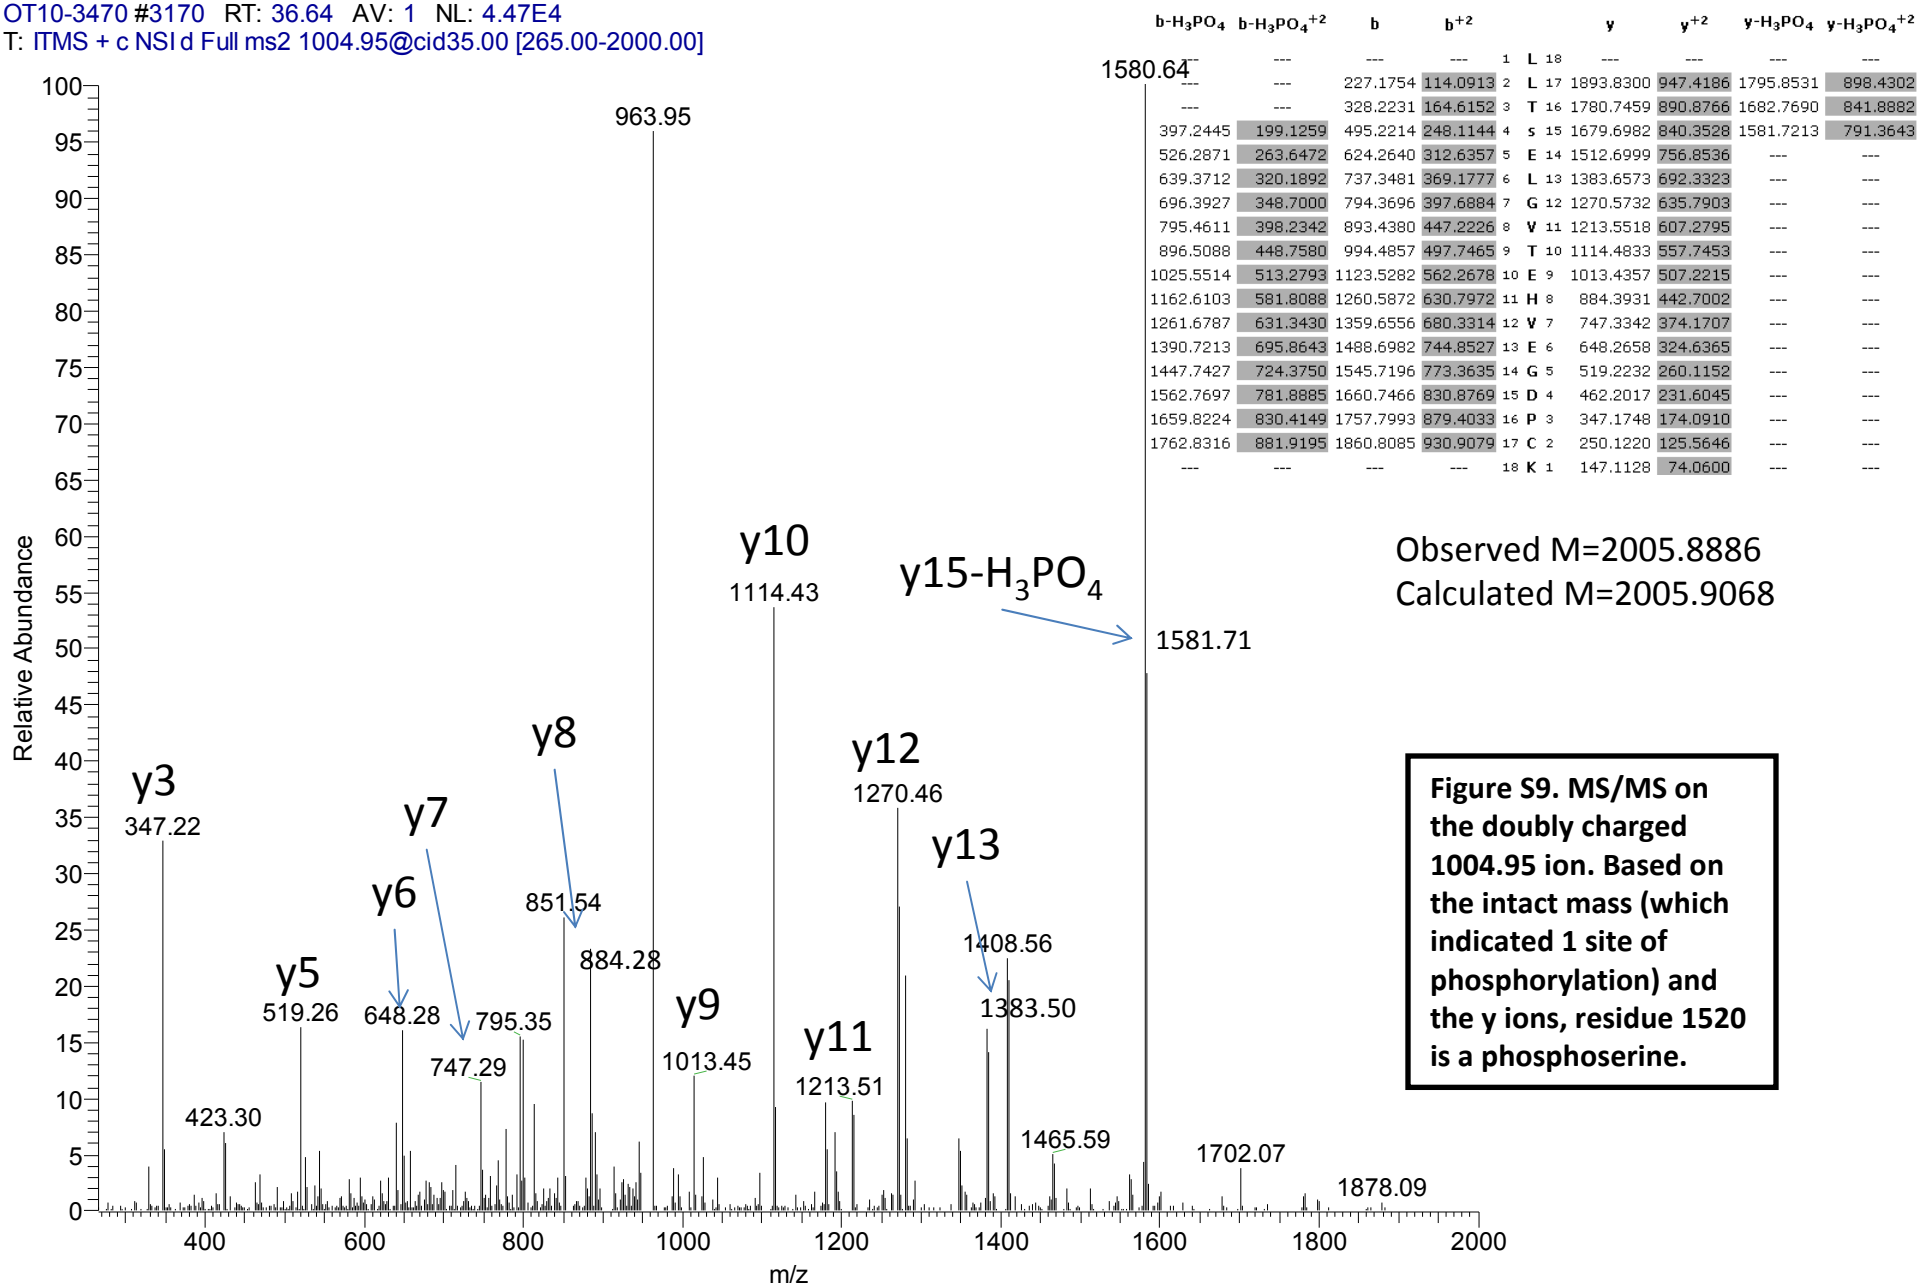

**Figure S9. MS/MS on the doubly charged 1004.95 ion. Based on the intact mass (which indicated 1 site of phosphorylation) and the y ions, residue 1520 is a phosphoserine.**

**CKII****MS/MS of peptide LVTYLA<sup>p</sup>SVPS<sup>e</sup>EDVCKR**

OT10-3474 #3220 RT: 37.05 AV: 1 NL: 5.40E4

T: ITMS + c NSI d Full ms2 930.95@cid35.00 [245.00-1875.00]

|  | b-H <sub>3</sub> PO <sub>4</sub> | b-H <sub>3</sub> PO <sub>4</sub> <sup>+2</sup> | b         | b <sup>+2</sup> |    | y    | y <sup>+2</sup> | y-H <sub>3</sub> PO <sub>4</sub> | y-H <sub>3</sub> PO <sub>4</sub> <sup>+2</sup> |          |
|--|----------------------------------|------------------------------------------------|-----------|-----------------|----|------|-----------------|----------------------------------|------------------------------------------------|----------|
|  | ---                              | ---                                            | ---       | ---             | 1  | L 16 | ---             | ---                              | ---                                            |          |
|  |                                  |                                                | 213.1598  | 107.0835        | 2  | V 15 | 1746.8132       | 873.9102                         | 1648.8363                                      | 824.9218 |
|  |                                  |                                                | 314.2074  | 157.6074        | 3  | T 14 | 1647.7448       | 824.3760                         | 1549.7679                                      | 775.3876 |
|  |                                  |                                                | 477.2708  | 239.1390        | 4  | Y 13 | 1546.6971       | 773.8522                         | 1448.7202                                      | 724.8638 |
|  |                                  |                                                | 590.3548  | 295.6811        | 5  | L 12 | 1383.6338       | 692.3205                         | 1285.6569                                      | 643.3321 |
|  |                                  |                                                | 661.3919  | 331.1996        | 6  | A 11 | 1270.5497       | 635.7785                         | 1172.5728                                      | 586.7901 |
|  | 730.4134                         | 365.7103                                       | 828.3903  | 414.6988        | 7  | s 10 | 1199.5126       | 600.2599                         | 1101.5357                                      | 551.2715 |
|  | 829.4818                         | 415.2445                                       | 927.4587  | 464.2330        | 8  | V 9  | 1032.5143       | 516.7608                         | ---                                            | ---      |
|  | 926.5346                         | 463.7709                                       | 1024.5115 | 512.7594        | 9  | P 8  | 933.4458        | 467.2266                         | ---                                            | ---      |
|  | 1013.5666                        | 507.2869                                       | 1111.5435 | 556.2754        | 10 | S 7  | 836.3931        | 418.7002                         | ---                                            | ---      |
|  | 1142.6092                        | 571.8082                                       | 1240.5861 | 620.7967        | 11 | E 6  | 749.3610        | 375.1842                         | ---                                            | ---      |
|  | 1257.6361                        | 629.3217                                       | 1355.6130 | 678.3102        | 12 | D 5  | 620.3185        | 310.6629                         | ---                                            | ---      |
|  | 1356.7046                        | 678.8559                                       | 1454.6815 | 727.8444        | 13 | V 4  | 505.2915        | 253.1494                         | ---                                            | ---      |
|  | 1459.7137                        | 730.3605                                       | 1557.6906 | 779.3490        | 14 | C 3  | 406.2231        | 203.6152                         | ---                                            | ---      |
|  | 1587.8087                        | 794.4080                                       | 1685.7856 | 843.3964        | 15 | K 2  | 303.2139        | 152.1106                         | ---                                            | ---      |
|  | ---                              | ---                                            | ---       | ---             | 16 | R 1  | 175.1190        | 88.0631                          | ---                                            | ---      |

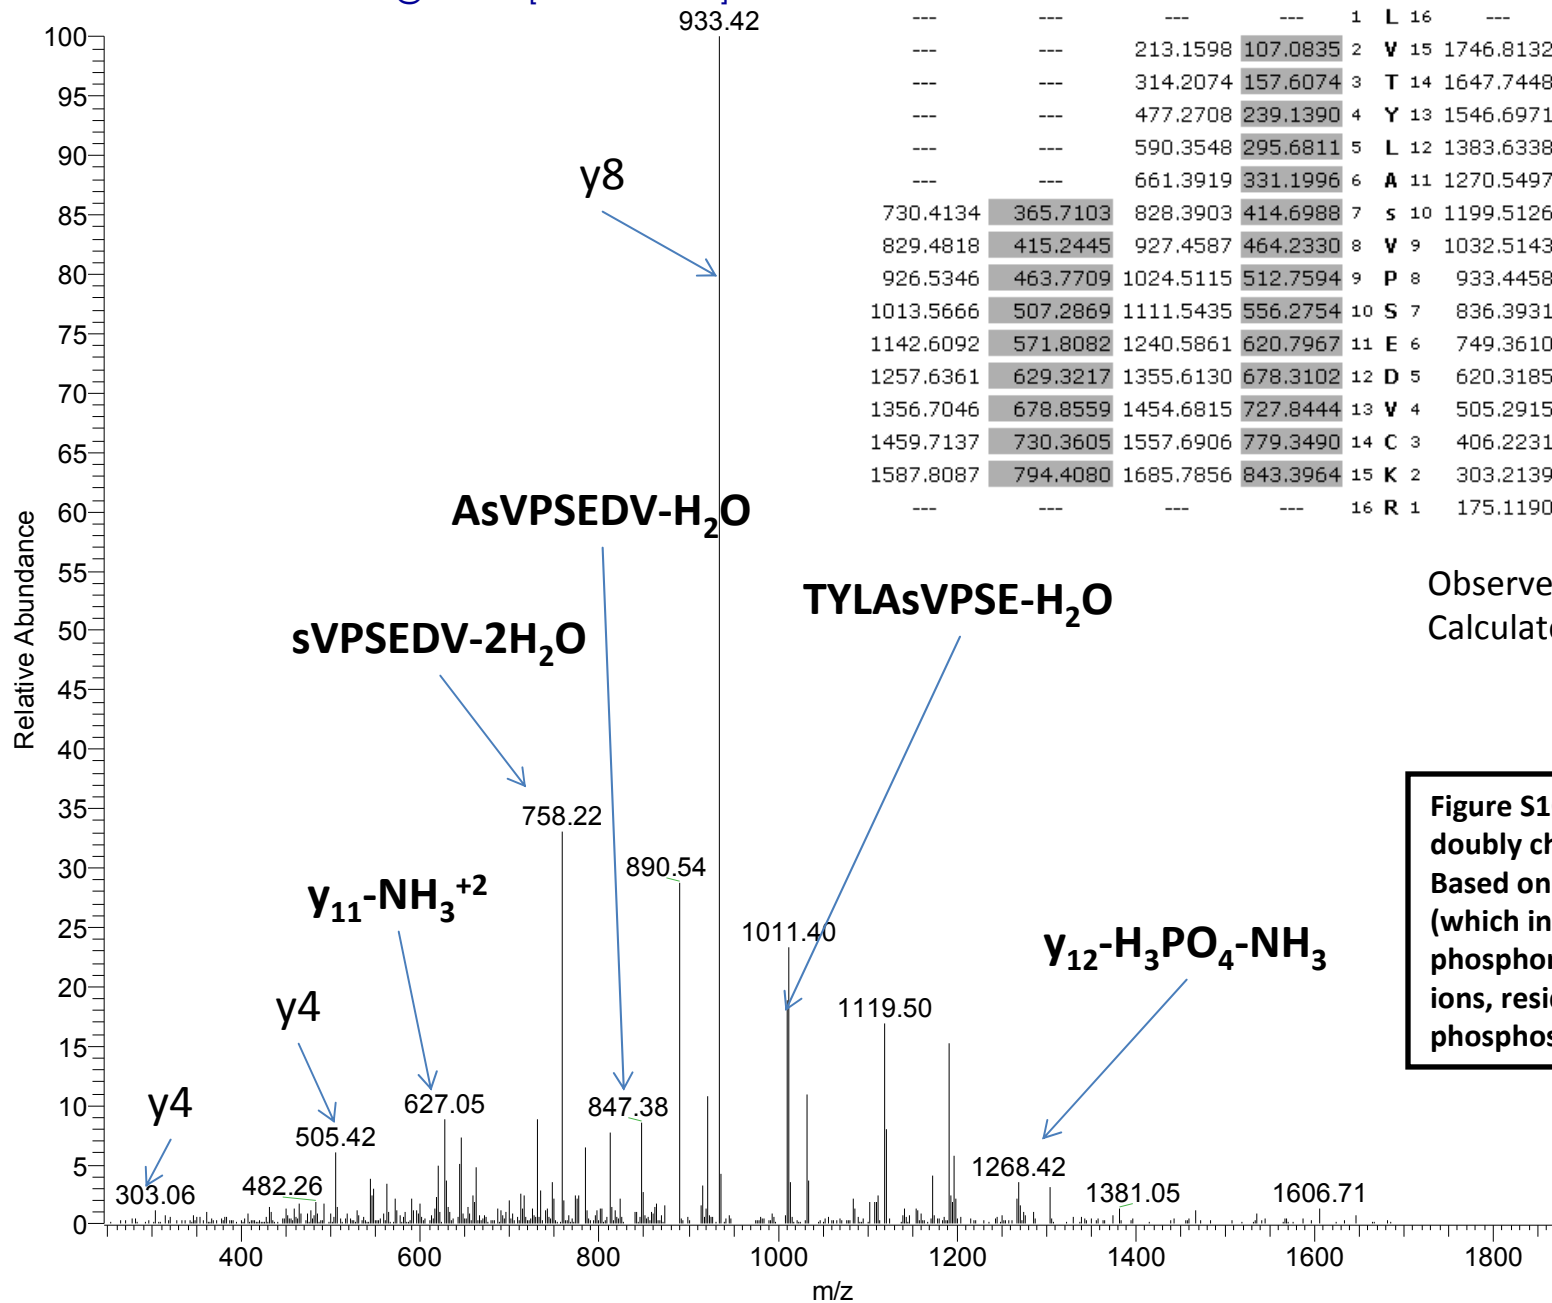

Observed M=1858.8710  
 Calculated M=1858.8900

Figure S10. MS/MS on the doubly charged 930.95 ion. Based on the intact mass (which indicated 1 site of phosphorylation) and the y ions, residue 83 is a phosphoserine.

**CKII**

# MS/MS of peptide **pTpSEQVCSVLESLEQYR**

OT10-3474 #4333 RT: 45.74 AV: 1 NL: 1.40E5  
T: ITMS + c NSI d Full ms2 1040.47@cid35.00 [275.00-2000.00]

| b-H <sub>3</sub> PO <sub>4</sub> | b-H <sub>3</sub> PO <sub>4</sub> +2 | b         | b+2      |        | y         | y+2      | y-H <sub>3</sub> PO <sub>4</sub> | y-H <sub>3</sub> PO <sub>4</sub> +2 |
|----------------------------------|-------------------------------------|-----------|----------|--------|-----------|----------|----------------------------------|-------------------------------------|
| ---                              | ---                                 | ---       | ---      | 1 T 17 | ---       | ---      | ---                              | ---                                 |
| 171.0764                         | 86.0418                             | 269.0533  | 135.0303 | 2 s 16 | 1978.8464 | 989.9268 | 1880.8695                        | 940.9384                            |
| 300.1190                         | 150.5631                            | 398.0959  | 199.5516 | 3 E 15 | 1811.8480 | 906.4276 | ---                              | ---                                 |
| 428.1776                         | 214.5924                            | 526.1545  | 263.5809 | 4 Q 14 | 1682.8054 | 841.9063 | ---                              | ---                                 |
| 527.2460                         | 264.1266                            | 625.2229  | 313.1151 | 5 V 13 | 1554.7468 | 777.8771 | ---                              | ---                                 |
| 630.2552                         | 315.6312                            | 728.2321  | 364.6197 | 6 C 12 | 1455.6784 | 728.3428 | ---                              | ---                                 |
| 717.2872                         | 359.1472                            | 815.2641  | 408.1357 | 7 S 11 | 1352.6692 | 676.8383 | ---                              | ---                                 |
| 816.3556                         | 408.6815                            | 914.3325  | 457.6699 | 8 V 10 | 1265.6372 | 633.3222 | ---                              | ---                                 |
| 929.4397                         | 465.2235                            | 1027.4166 | 514.2119 | 9 L 9  | 1166.5688 | 583.7880 | ---                              | ---                                 |
| 1058.4823                        | 529.7448                            | 1156.4592 | 578.7332 | 10 E 8 | 1053.4847 | 527.2460 | ---                              | ---                                 |
| 1145.5143                        | 573.2608                            | 1243.4912 | 622.2492 | 11 S 7 | 924.4421  | 462.7247 | ---                              | ---                                 |
| 1258.5984                        | 629.8028                            | 1356.5753 | 678.7913 | 12 L 6 | 837.4101  | 419.2087 | ---                              | ---                                 |
| 1387.6410                        | 694.3241                            | 1485.6179 | 743.3126 | 13 E 5 | 724.3260  | 362.6667 | ---                              | ---                                 |
| 1515.6996                        | 758.3534                            | 1613.6764 | 807.3419 | 14 Q 4 | 595.2835  | 298.1454 | ---                              | ---                                 |
| 1644.7421                        | 822.8747                            | 1742.7190 | 871.8632 | 15 E 3 | 467.2249  | 234.1161 | ---                              | ---                                 |
| 1807.8055                        | 904.4064                            | 1905.7824 | 953.3948 | 16 Y 2 | 338.1823  | 169.5948 | ---                              | ---                                 |
| ---                              | ---                                 | ---       | ---      | 17 R 1 | 175.1190  | 88.0631  | ---                              | ---                                 |

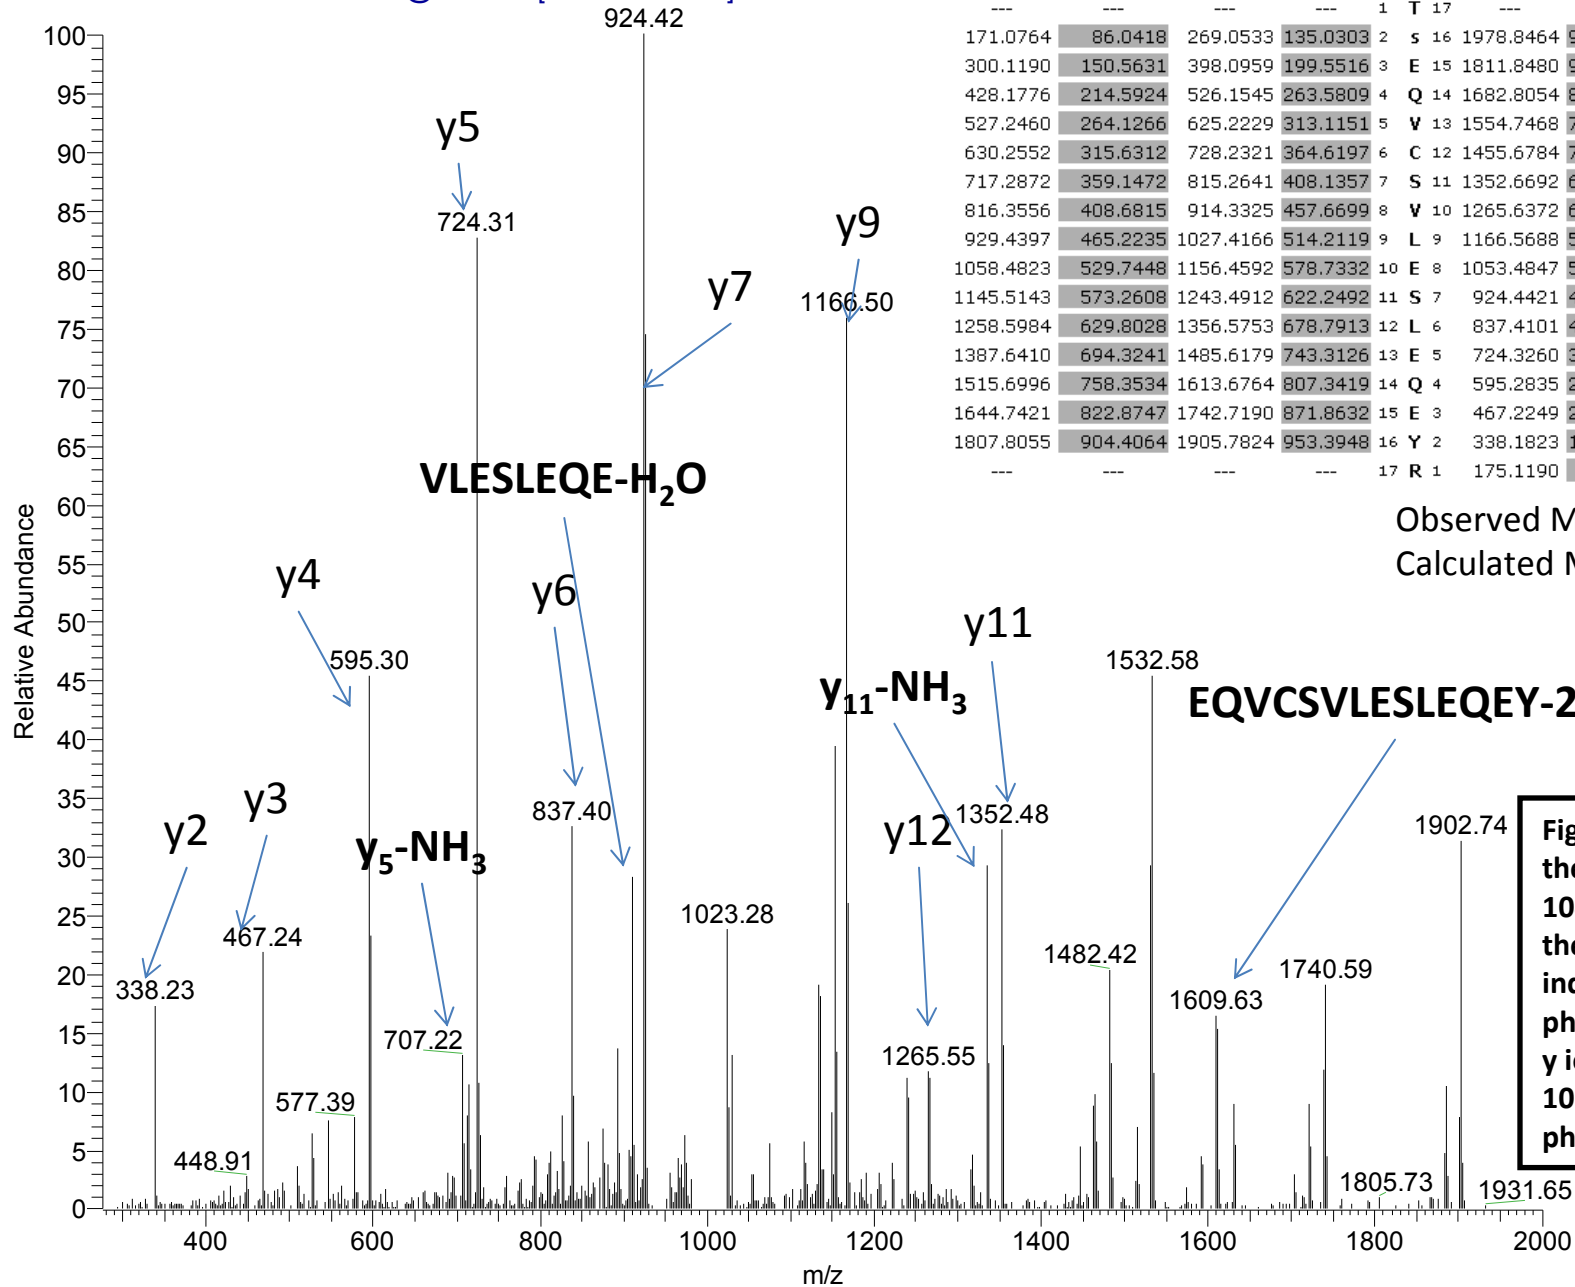

**Figure S11. MS/MS on the doubly charged 1040.47 ion. Based on the intact mass (which indicated 1 site of phosphorylation) and the y ions, either residue 1002 or 1003 is phosphorylated.**

**CKII**

# MS/MS of peptide DLELDIIPASLpSDR

OT10-3473 #3543 RT: 45.24 AV: 1 NL: 1.03E4  
T: ITMS + c NSI d Full ms2 818.89@cid35.00 [215.00-1650.00]

| b-H <sub>3</sub> PO <sub>4</sub> | b-H <sub>3</sub> PO <sub>4</sub> <sup>+2</sup> | b         | b <sup>+2</sup> |    | y    | y <sup>+2</sup> | y-H <sub>3</sub> PO <sub>4</sub> | y-H <sub>3</sub> PO <sub>4</sub> <sup>+2</sup> |          |
|----------------------------------|------------------------------------------------|-----------|-----------------|----|------|-----------------|----------------------------------|------------------------------------------------|----------|
| ---                              | ---                                            | ---       | ---             | 1  | D 14 | ---             | ---                              | ---                                            |          |
| ---                              | ---                                            | 229.1183  | 115.0628        | 2  | L 13 | 1521.7560       | 761.3816                         | 1423.7791                                      | 712.3932 |
| ---                              | ---                                            | 358.1609  | 179.5841        | 3  | E 12 | 1408.6720       | 704.8396                         | 1310.6951                                      | 655.8512 |
| ---                              | ---                                            | 471.2449  | 236.1261        | 4  | L 11 | 1279.6294       | 640.3183                         | 1181.6525                                      | 591.3299 |
| ---                              | ---                                            | 586.2719  | 293.6396        | 5  | D 10 | 1166.5453       | 583.7763                         | 1068.5684                                      | 534.7878 |
| ---                              | ---                                            | 699.3559  | 350.1816        | 6  | I 9  | 1051.5184       | 526.2628                         | 953.5415                                       | 477.2744 |
| ---                              | ---                                            | 812.4400  | 406.7236        | 7  | I 8  | 938.4343        | 469.7208                         | 840.4574                                       | 420.7323 |
| ---                              | ---                                            | 909.4928  | 455.2500        | 8  | P 7  | 825.3502        | 413.1788                         | 727.3733                                       | 364.1903 |
| ---                              | ---                                            | 980.5299  | 490.7686        | 9  | A 6  | 728.2975        | 364.6524                         | 630.3206                                       | 315.6639 |
| ---                              | ---                                            | 1067.5619 | 534.2846        | 10 | S 5  | 657.2603        | 329.1338                         | 559.2835                                       | 280.1454 |
| ---                              | ---                                            | 1180.6460 | 590.8266        | 11 | L 4  | 570.2283        | 285.6178                         | 472.2514                                       | 236.6293 |
| 1249.6674                        | 625.3374                                       | 1347.6443 | 674.3258        | 12 | s 3  | 457.1443        | 229.0758                         | 359.1674                                       | 180.0873 |
| 1364.6944                        | 682.8508                                       | 1462.6713 | 731.8393        | 13 | D 2  | 290.1459        | 145.5766                         | ---                                            | ---      |
| ---                              | ---                                            | ---       | ---             | 14 | R 1  | 175.1190        | 88.0631                          | ---                                            | ---      |

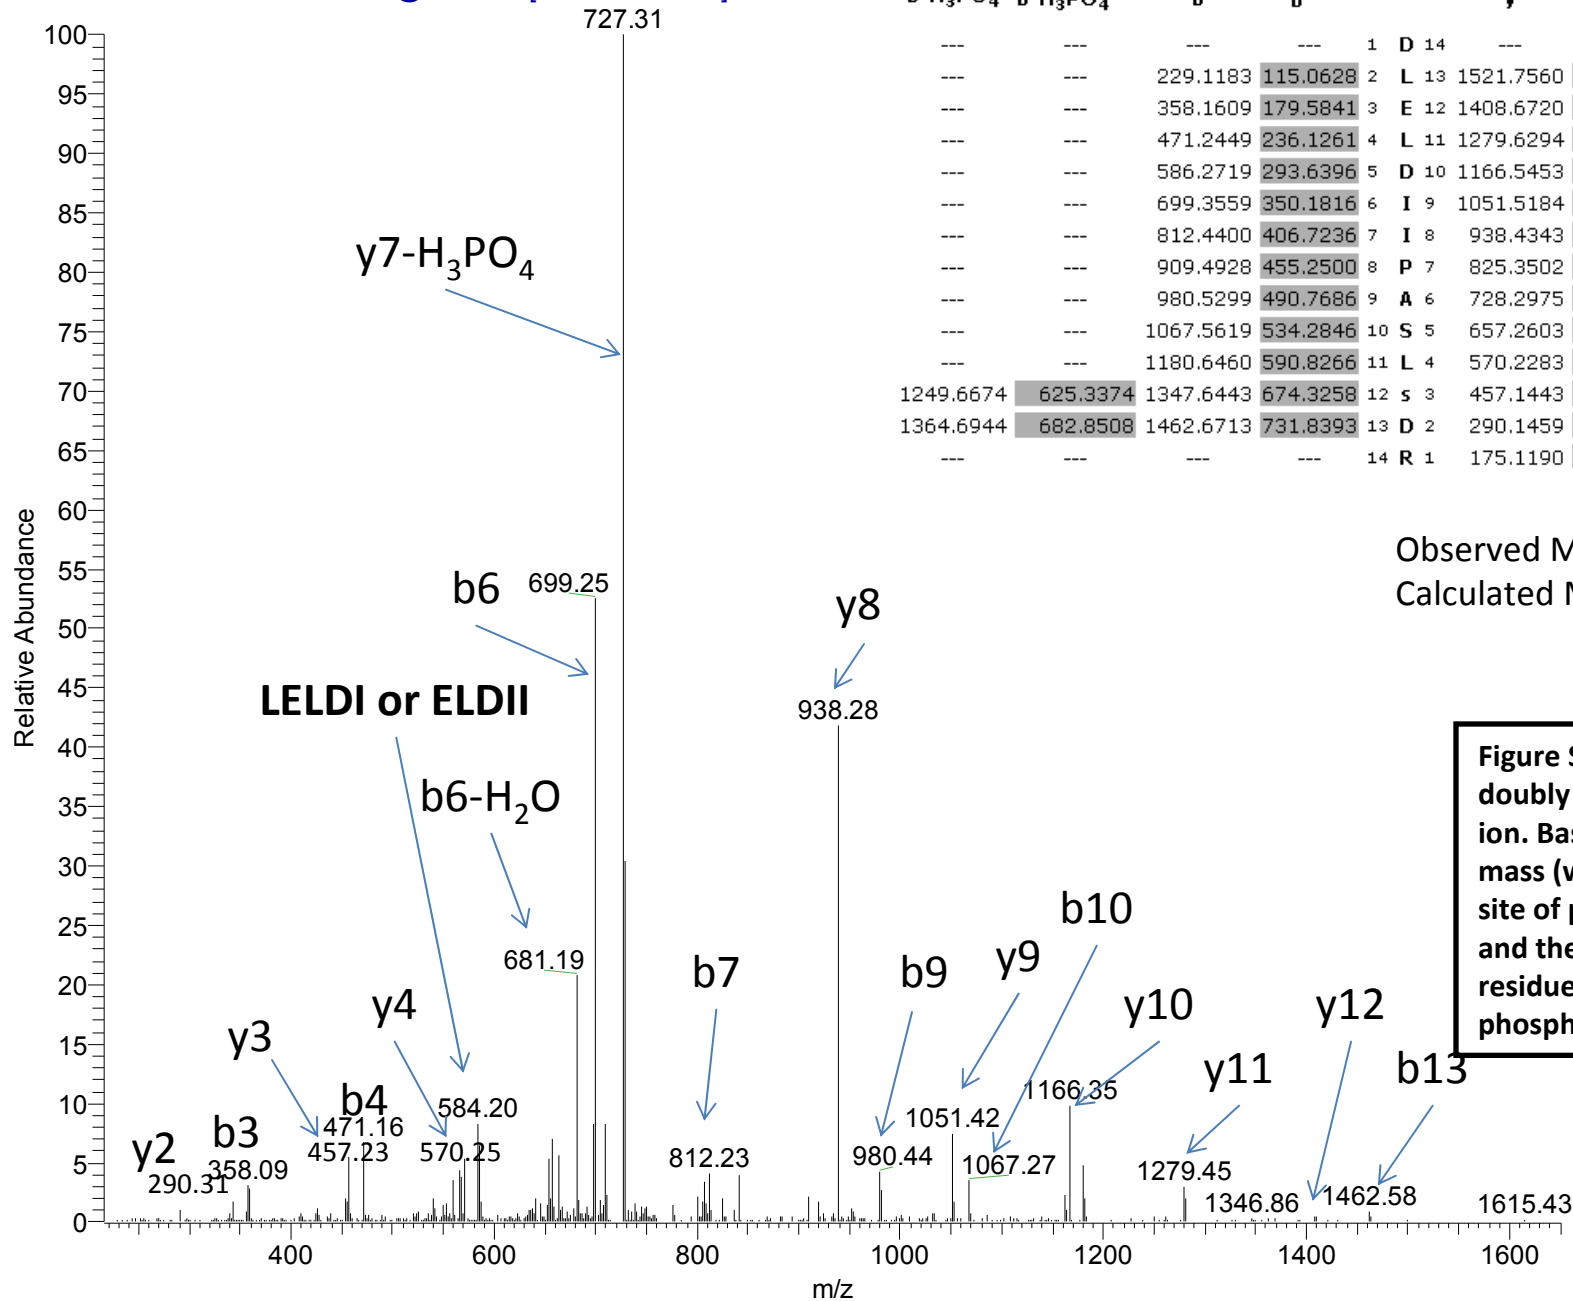

Observed M=1635.7706  
Calculated M=1635.7757

Figure S12. MS/MS on the doubly charged 818.89 ion. Based on the intact mass (which indicated 1 site of phosphorylation) and the y2, y3 and y4 ions, residue 1249 is a phosphoserine.

OT10-3474 #3173 RT: 36.68 AV: 1 NL: 4.41E4  
 T: ITMS + c NSI d Full ms2 1003.95@cid35.00 [265.00-2000.00]

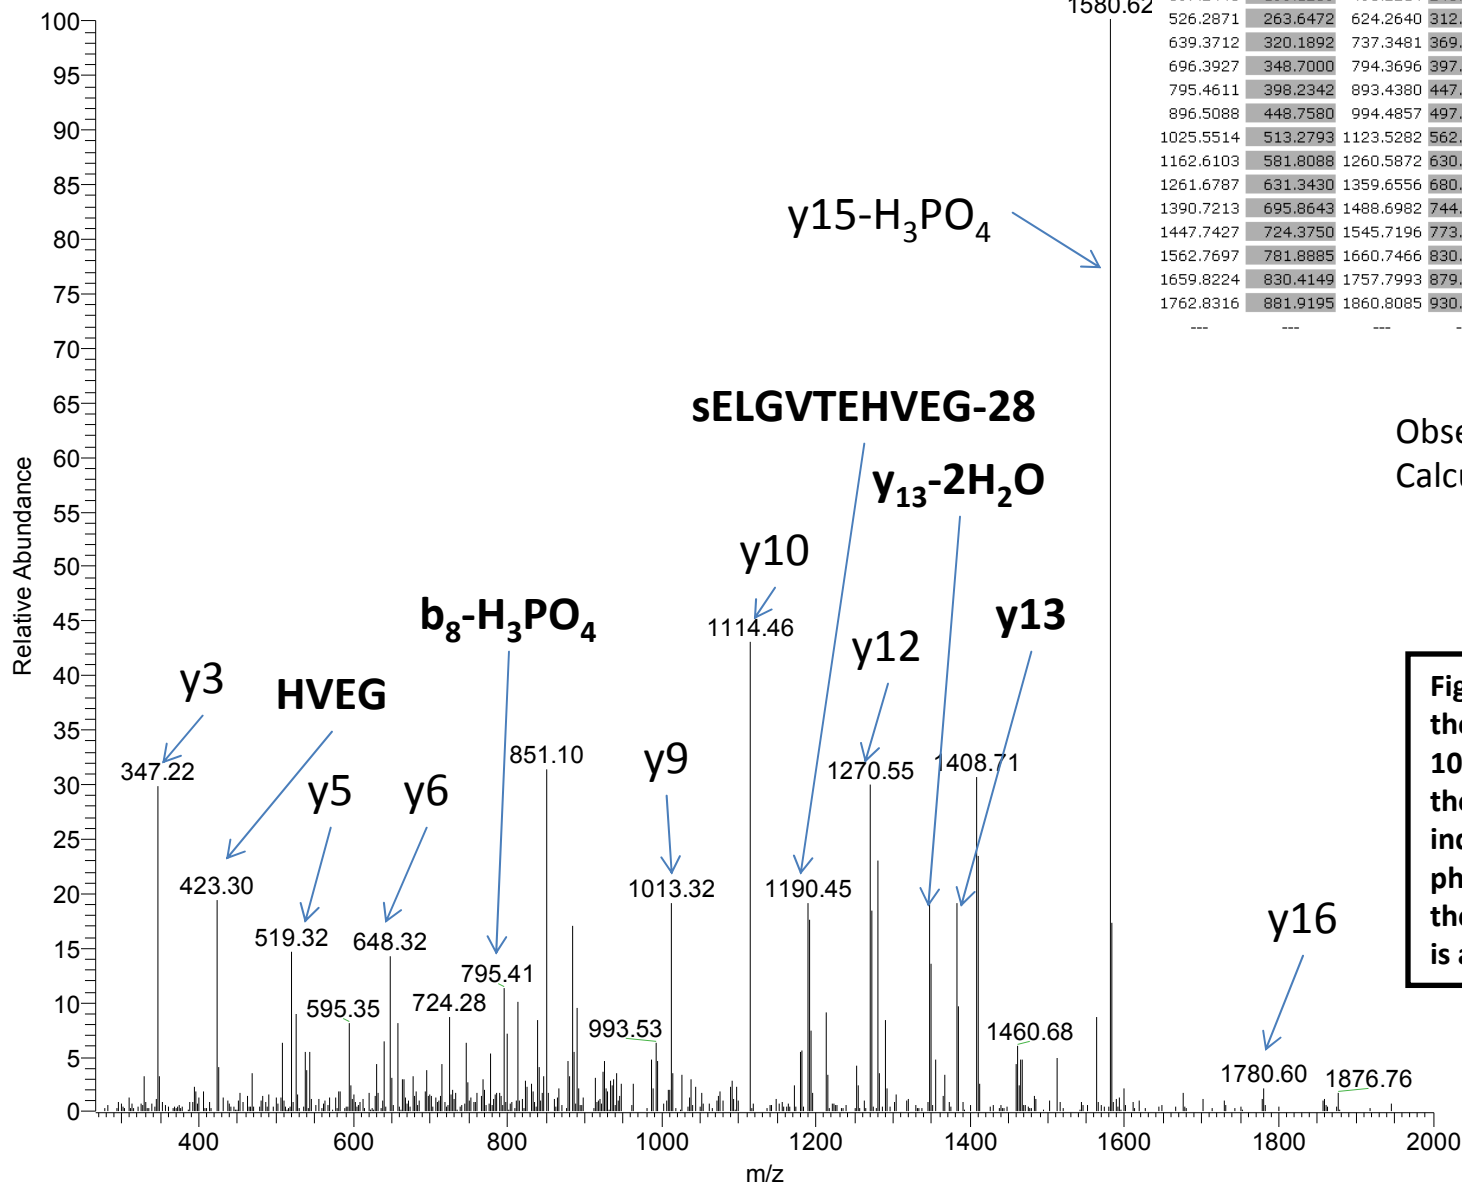

| b-H <sub>3</sub> PO <sub>4</sub> | b-H <sub>3</sub> PO <sub>4</sub> <sup>+2</sup> | b         | b <sup>+2</sup> |    | y | y <sup>+2</sup> | y-H <sub>3</sub> PO <sub>4</sub> | y-H <sub>3</sub> PO <sub>4</sub> <sup>+2</sup> |
|----------------------------------|------------------------------------------------|-----------|-----------------|----|---|-----------------|----------------------------------|------------------------------------------------|
| ---                              | ---                                            | ---       | ---             | 1  | L | 18              | ---                              | ---                                            |
| ---                              | ---                                            | 227.1754  | 114.0913        | 2  | L | 17              | 1893.8300                        | 947.4186                                       |
| ---                              | ---                                            | 328.2231  | 164.6152        | 3  | T | 16              | 1780.7459                        | 890.8766                                       |
| ---                              | ---                                            | ---       | ---             | 4  | S | 15              | 1679.6982                        | 840.3528                                       |
| 526.2871                         | 263.6472                                       | 624.2640  | 312.6357        | 5  | E | 14              | 1512.6999                        | 756.8536                                       |
| 639.3712                         | 320.1892                                       | 737.3481  | 369.1777        | 6  | L | 13              | 1383.6573                        | 692.3323                                       |
| 696.3927                         | 348.7000                                       | 794.3696  | 397.6884        | 7  | G | 12              | 1270.5732                        | 635.7903                                       |
| 795.4611                         | 398.2342                                       | 893.4380  | 447.2226        | 8  | V | 11              | 1213.5518                        | 607.2795                                       |
| 896.5088                         | 448.7580                                       | 994.4857  | 497.7465        | 9  | T | 10              | 1114.4833                        | 557.7453                                       |
| 1025.5514                        | 513.2793                                       | 1123.5282 | 562.2678        | 10 | E | 9               | 1013.4357                        | 507.2215                                       |
| 1162.6103                        | 581.8088                                       | 1260.5872 | 630.7972        | 11 | H | 8               | 884.3931                         | 442.7002                                       |
| 1261.6787                        | 631.3430                                       | 1359.6556 | 680.3314        | 12 | V | 7               | 747.3342                         | 374.1707                                       |
| 1390.7213                        | 695.8643                                       | 1488.6982 | 744.8527        | 13 | E | 6               | 648.2658                         | 324.6365                                       |
| 1447.7427                        | 724.3750                                       | 1545.7196 | 773.3635        | 14 | G | 5               | 519.2232                         | 260.1152                                       |
| 1562.7697                        | 781.8885                                       | 1660.7466 | 830.8769        | 15 | D | 4               | 462.2017                         | 231.6045                                       |
| 1659.8224                        | 830.4149                                       | 1757.7993 | 879.4033        | 16 | P | 3               | 347.1748                         | 174.0910                                       |
| 1762.8316                        | 881.9195                                       | 1860.8085 | 930.9079        | 17 | C | 2               | 250.1220                         | 125.5646                                       |
| ---                              | ---                                            | ---       | ---             | 18 | K | 1               | 147.1128                         | 74.0600                                        |

Observed M=2005.8874  
 Calculated M=2005.9068

Figure S13. MS/MS on the doubly charged 1003.95 ion. Based on the intact mass (which indicated 1 site of phosphorylation) and the y ions, residue 1520 is a phosphoserine.

**CKII**

**MS/MS of peptide DGVEDGDpSQGDGSSQPDTISIASR**

OT10-3473 #2616 RT: 34.30 AV: 1 NL: 1.10E4  
 T: ITMS + c NSI d Full ms2 1237.50@cid35.00 [330.00-2000.00]

|           | b-H <sub>3</sub> PO <sub>4</sub> | b-H <sub>3</sub> PO <sub>4</sub> <sup>+2</sup> | b         | b <sup>+2</sup> |      | y         | y <sup>+2</sup> | y-H <sub>3</sub> PO <sub>4</sub> | y-H <sub>3</sub> PO <sub>4</sub> <sup>+2</sup> |
|-----------|----------------------------------|------------------------------------------------|-----------|-----------------|------|-----------|-----------------|----------------------------------|------------------------------------------------|
| ---       | ---                              | ---                                            | ---       | ---             | 1    | D 24      | ---             | ---                              | ---                                            |
| ---       | ---                              | 173.0557                                       | 87.0315   | 2               | G 23 | 2357.9729 | 1179.4901       | 2259.9960                        | 1130.5016                                      |
| ---       | ---                              | 272.1241                                       | 136.5657  | 3               | V 22 | 2300.9514 | 1150.9794       | 2202.9745                        | 1101.9909                                      |
| ---       | ---                              | 401.1667                                       | 201.0870  | 4               | E 21 | 2201.8830 | 1101.4451       | 2103.9061                        | 1052.4567                                      |
| ---       | ---                              | 516.1936                                       | 258.6005  | 5               | D 20 | 2072.8404 | 1036.9239       | 1974.8635                        | 987.9354                                       |
| ---       | ---                              | 573.2151                                       | 287.1112  | 6               | G 19 | 1957.8135 | 979.4104        | 1859.8366                        | 930.4219                                       |
| ---       | ---                              | 688.2420                                       | 344.6247  | 7               | D 18 | 1900.7920 | 950.8996        | 1802.8151                        | 901.9112                                       |
| 757.2635  | 379.1354                         | 855.2404                                       | 428.1238  | 8               | S 17 | 1785.7651 | 893.3862        | 1687.7882                        | 844.3977                                       |
| 885.3221  | 443.1647                         | 983.2990                                       | 492.1531  | 9               | Q 16 | 1618.7667 | 809.8870        | ---                              | ---                                            |
| 942.3435  | 471.6754                         | 1040.3204                                      | 520.6639  | 10              | G 15 | 1490.7081 | 745.8577        | ---                              | ---                                            |
| 1057.3705 | 529.1889                         | 1155.3474                                      | 578.1773  | 11              | D 14 | 1433.6867 | 717.3470        | ---                              | ---                                            |
| 1114.3920 | 557.6996                         | 1212.3688                                      | 606.6881  | 12              | G 13 | 1318.6597 | 659.8335        | ---                              | ---                                            |
| 1201.4240 | 601.2156                         | 1299.4009                                      | 650.2041  | 13              | S 12 | 1261.6383 | 631.3228        | ---                              | ---                                            |
| 1288.4560 | 644.7316                         | 1386.4329                                      | 693.7201  | 14              | S 11 | 1174.6062 | 587.8068        | ---                              | ---                                            |
| 1416.5146 | 708.7609                         | 1514.4915                                      | 757.7494  | 15              | Q 10 | 1087.5742 | 544.2907        | ---                              | ---                                            |
| 1513.5673 | 757.2873                         | 1611.5442                                      | 806.2758  | 16              | P 9  | 959.5156  | 480.2615        | ---                              | ---                                            |
| 1628.5943 | 814.8008                         | 1726.5712                                      | 863.7892  | 17              | D 8  | 862.4629  | 431.7351        | ---                              | ---                                            |
| 1729.6420 | 865.3246                         | 1827.6189                                      | 914.3131  | 18              | T 7  | 747.4359  | 374.2216        | ---                              | ---                                            |
| 1842.7260 | 921.8667                         | 1940.7029                                      | 970.8551  | 19              | I 6  | 646.3883  | 323.6978        | ---                              | ---                                            |
| 1929.7581 | 965.3827                         | 2027.7350                                      | 1014.3711 | 20              | S 5  | 533.3042  | 267.1557        | ---                              | ---                                            |
| 2042.8421 | 1021.9247                        | 2140.8190                                      | 1070.9131 | 21              | I 4  | 446.2722  | 223.6397        | ---                              | ---                                            |
| 2113.8792 | 1057.4433                        | 2211.8561                                      | 1106.4317 | 22              | A 3  | 333.1881  | 167.0977        | ---                              | ---                                            |
| 2200.9113 | 1100.9593                        | 2298.8882                                      | 1149.9477 | 23              | S 2  | 262.1510  | 131.5791        | ---                              | ---                                            |
| ---       | ---                              | ---                                            | ---       | 24              | R 1  | 175.1190  | 88.0631         | ---                              | ---                                            |

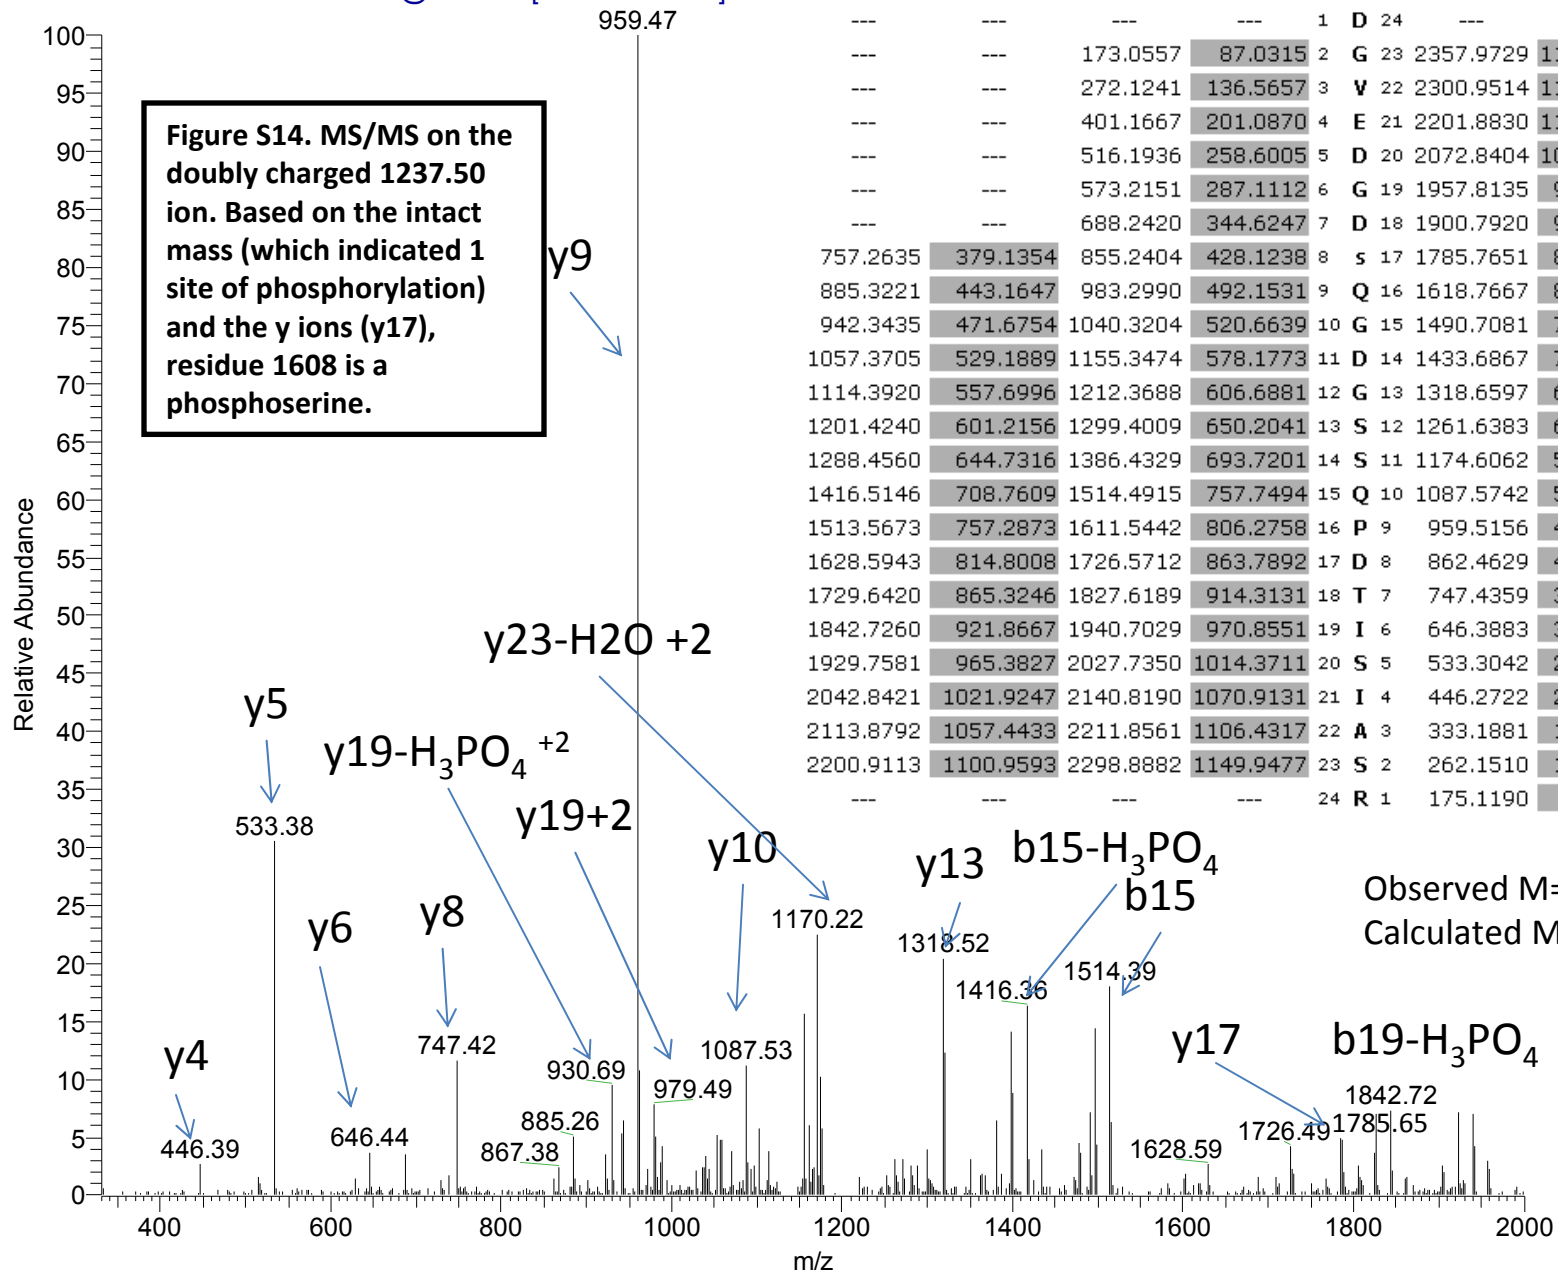

CKII

# MS/MS of peptide TSQNTVEpSDKDGNLVPR

OT10-3473 #2296 RT: 30.44 AV: 1 NL: 1.44E4  
T: ITMS + c NSI d Full ms2 970.94@cid35.00 [255.00-1955.00]

| b-H <sub>3</sub> PO <sub>4</sub> | b-H <sub>3</sub> PO <sub>4</sub> <sup>+2</sup> | b         | b <sup>+2</sup> | y      | y <sup>+2</sup> | y-H <sub>3</sub> PO <sub>4</sub> | y-H <sub>3</sub> PO <sub>4</sub> <sup>+2</sup> |          |
|----------------------------------|------------------------------------------------|-----------|-----------------|--------|-----------------|----------------------------------|------------------------------------------------|----------|
| ---                              | ---                                            | ---       | ---             | 1 T 17 | ---             | ---                              | ---                                            |          |
| ---                              | ---                                            | 189.0870  | 95.0471         | 2 S 16 | 1838.8280       | 919.9176                         | 1740.8511                                      | 870.9292 |
| ---                              | ---                                            | 317.1456  | 159.0764        | 3 Q 15 | 1751.7960       | 876.4016                         | 1653.8191                                      | 827.4132 |
| ---                              | ---                                            | 431.1885  | 216.0979        | 4 N 14 | 1623.7374       | 812.3723                         | 1525.7605                                      | 763.3839 |
| ---                              | ---                                            | 532.2362  | 266.6217        | 5 T 13 | 1509.6945       | 755.3509                         | 1411.7176                                      | 706.3624 |
| ---                              | ---                                            | 631.3046  | 316.1559        | 6 V 12 | 1408.6468       | 704.8270                         | 1310.6699                                      | 655.8386 |
| ---                              | ---                                            | 760.3472  | 380.6772        | 7 E 11 | 1309.5784       | 655.2928                         | 1211.6015                                      | 606.3044 |
| 829.3686                         | 415.1880                                       | 927.3455  | 464.1764        | 8 s 10 | 1180.5358       | 590.7715                         | 1082.5589                                      | 541.7831 |
| 944.3956                         | 472.7014                                       | 1042.3725 | 521.6899        | 9 D 9  | 1013.5374       | 507.2724                         | ---                                            | ---      |
| 1072.4905                        | 536.7489                                       | 1170.4674 | 585.7374        | 10 K 8 | 898.5105        | 449.7589                         | ---                                            | ---      |
| 1187.5175                        | 594.2624                                       | 1285.4944 | 643.2508        | 11 D 7 | 770.4155        | 385.7114                         | ---                                            | ---      |
| 1244.5390                        | 622.7731                                       | 1342.5158 | 671.7616        | 12 G 6 | 655.3886        | 328.1979                         | ---                                            | ---      |
| 1358.5819                        | 679.7946                                       | 1456.5588 | 728.7830        | 13 N 5 | 598.3671        | 299.6872                         | ---                                            | ---      |
| 1471.6659                        | 736.3366                                       | 1569.6428 | 785.3251        | 14 L 4 | 484.3242        | 242.6657                         | ---                                            | ---      |
| 1570.7344                        | 785.8708                                       | 1668.7113 | 834.8593        | 15 V 3 | 371.2401        | 186.1237                         | ---                                            | ---      |
| 1667.7871                        | 834.3972                                       | 1765.7640 | 883.3856        | 16 P 2 | 272.1717        | 136.5895                         | ---                                            | ---      |
| ---                              | ---                                            | ---       | ---             | 17 R 1 | 175.1190        | 88.0631                          | ---                                            | ---      |

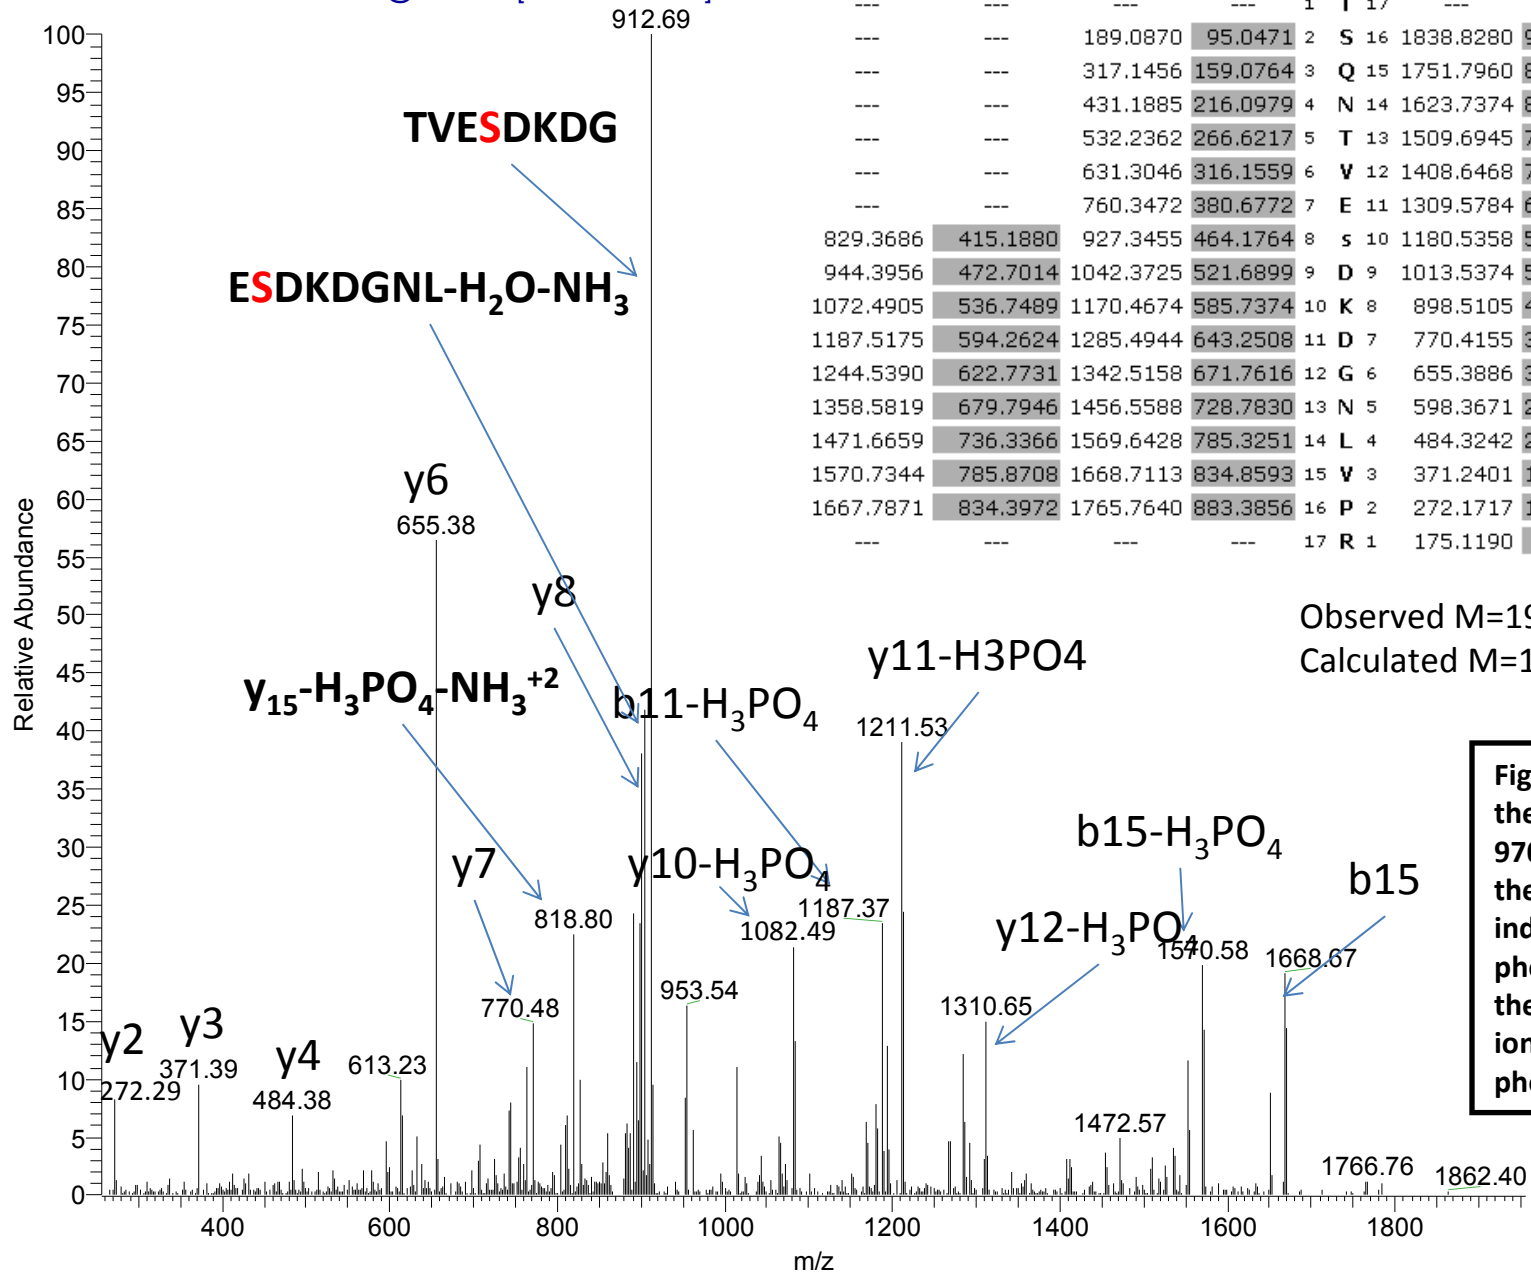

Observed M=1938.8607  
Calculated M=1938.8684

Figure S15. MS/MS on the doubly charged 970.94 ion. Based on the intact mass (which indicated 1 site of phosphorylation) and the y2 to y10-H<sub>3</sub>PO<sub>4</sub> ions, residue 1632 is a phosphoserine.

**Fyn**

**MS/MS of peptide RHDDFEEVAQNTpYTNADK**

OT10-3477 #2355 RT: 31.26 AV: 1 NL: 6.96E2  
T: ITMS + c NSI d Full ms2 743.83@cid35.00 [190.00-1500.00]

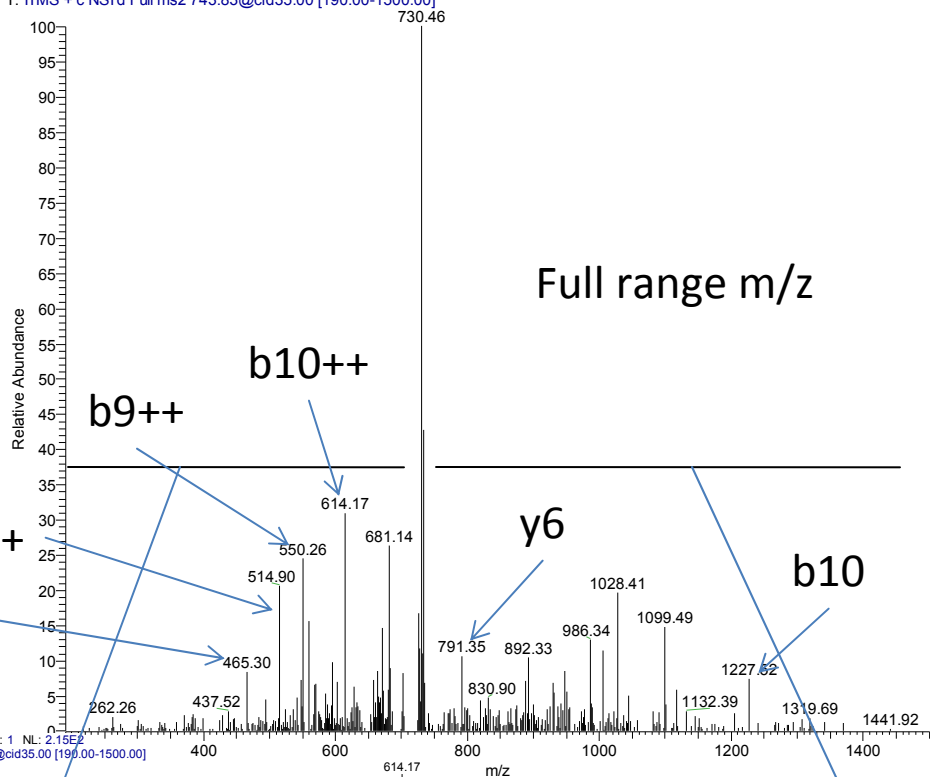

| b         | b+2       |    | y    | y+2       |
|-----------|-----------|----|------|-----------|
| ---       | ---       | 1  | R 18 | ---       |
| 294.1673  | 147.5873  | 2  | H 17 | 2076.8182 |
| 409.1942  | 205.1008  | 3  | D 16 | 1939.7593 |
| 524.2212  | 262.6142  | 4  | D 15 | 1824.7324 |
| 671.2896  | 336.1484  | 5  | F 14 | 1709.7054 |
| 800.3322  | 400.6697  | 6  | E 13 | 1562.6370 |
| 929.3748  | 465.1910  | 7  | E 12 | 1433.5944 |
| 1028.4432 | 514.7252  | 8  | V 11 | 1304.5518 |
| 1099.4803 | 550.2438  | 9  | A 10 | 1205.4834 |
| 1227.5389 | 614.2731  | 10 | Q 9  | 1134.4463 |
| 1341.5818 | 671.2945  | 11 | N 8  | 1006.3877 |
| 1442.6295 | 721.8184  | 12 | T 7  | 892.3448  |
| 1685.6592 | 843.3332  | 13 | y 6  | 791.2971  |
| 1786.7068 | 893.8571  | 14 | T 5  | 548.2675  |
| 1900.7498 | 950.8785  | 15 | N 4  | 447.2198  |
| 1971.7869 | 986.3971  | 16 | A 3  | 333.1769  |
| 2086.8138 | 1043.9105 | 17 | D 2  | 262.1397  |
| ---       | ---       | 18 | K 1  | 147.1128  |

Observed M=2231.9017  
Calculated M=2231.9120

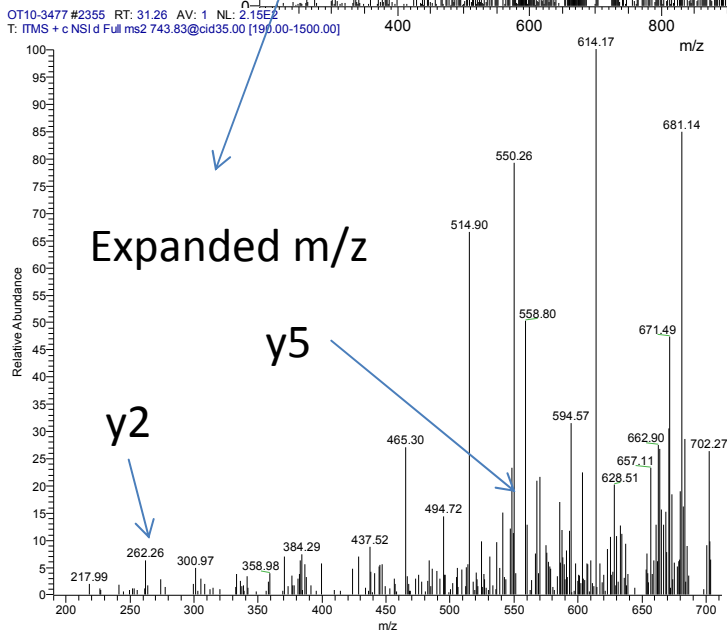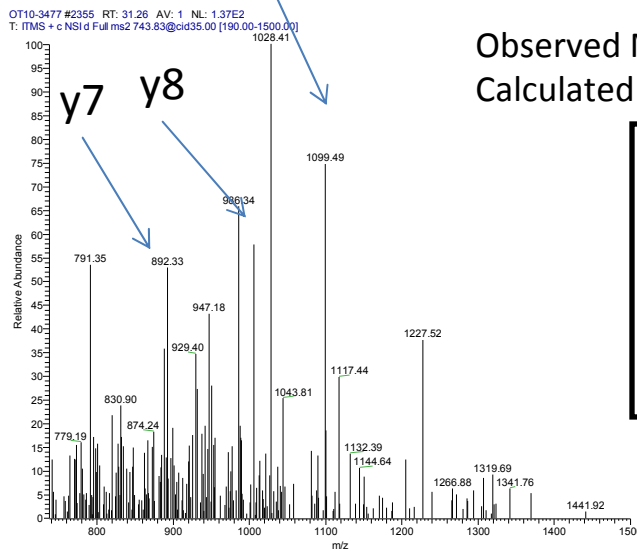

**Figure S16. MS/MS on the triply charged 743.83 ion. Based on the intact mass (which indicated 1 site of phosphorylation) and the y2 to y8 ions, residue 591 is a phosphotyrosine**



**Fyn**

# MS/MS of peptide WHLGGDPFSTpYV

OT10-3477 #3451 RT: 44.62 AV: 1 NL: 2.21E3  
T: ITMS + c NSI d Full ms2 778.33@cid35.00 [200.00-1570.00]

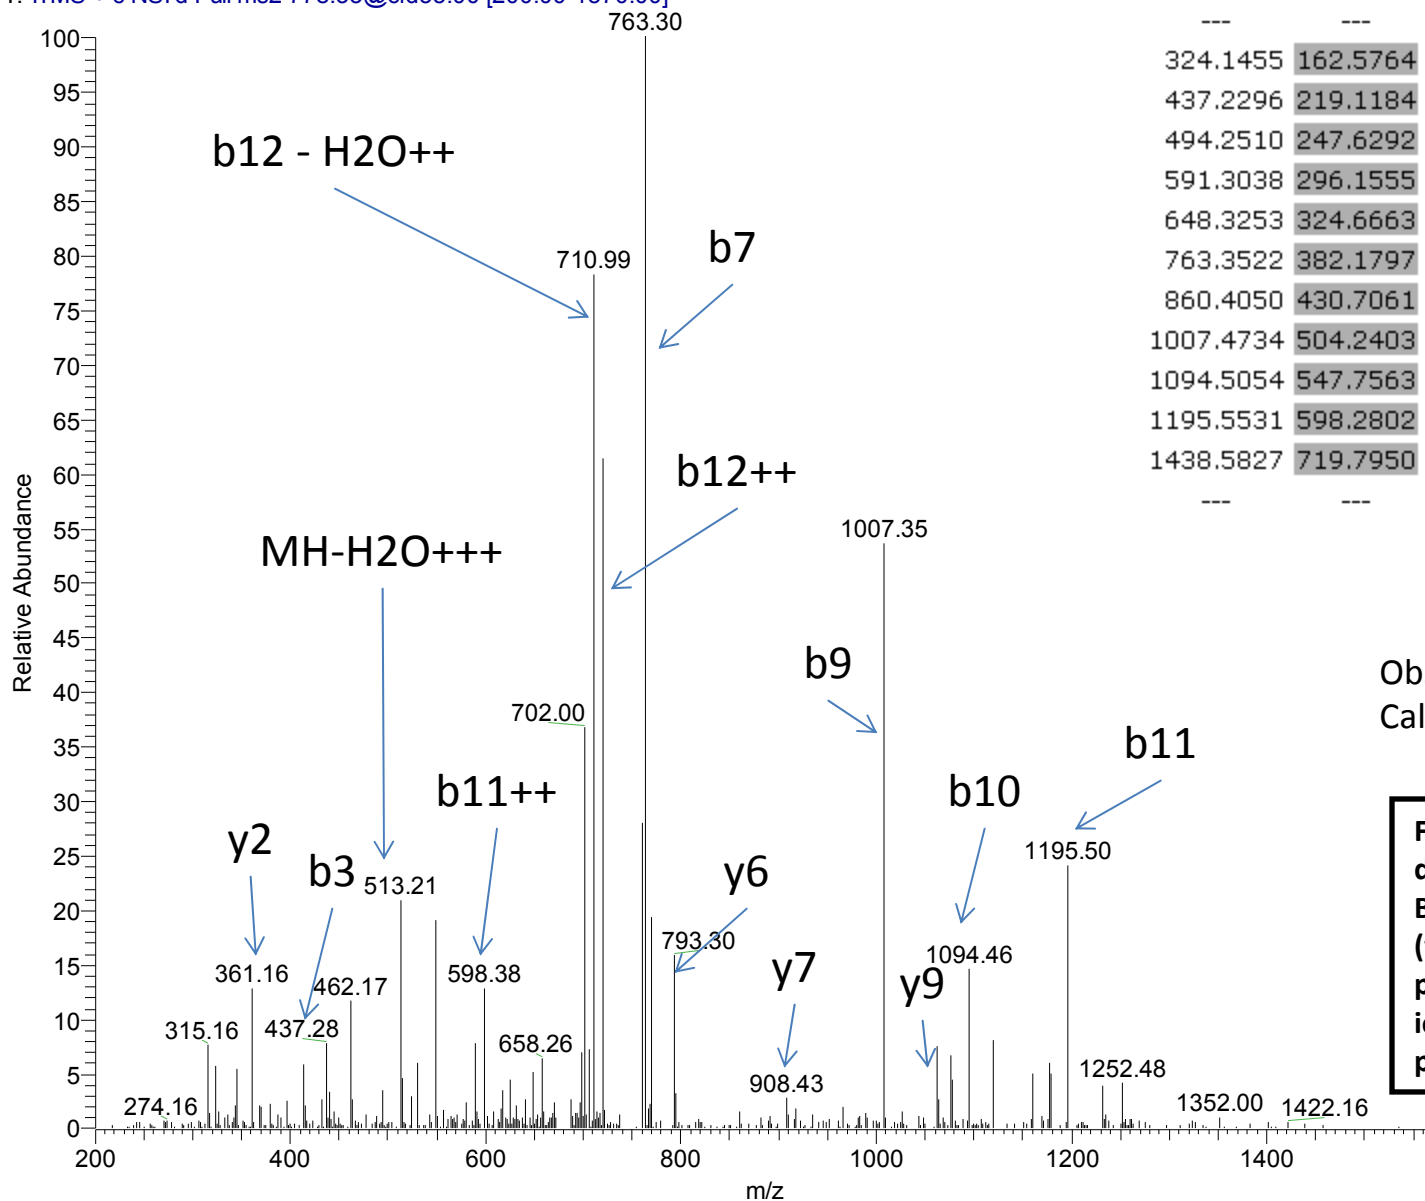

| b         | b <sup>+2</sup> |    | y    | y <sup>+2</sup> |
|-----------|-----------------|----|------|-----------------|
| ---       | ---             | 1  | W 13 | ---             |
| 324.1455  | 162.5764        | 2  | H 12 | 1369.5824       |
| 437.2296  | 219.1184        | 3  | L 11 | 1232.5235       |
| 494.2510  | 247.6292        | 4  | G 10 | 1119.4394       |
| 591.3038  | 296.1555        | 5  | P 9  | 1062.4180       |
| 648.3253  | 324.6663        | 6  | G 8  | 965.3652        |
| 763.3522  | 382.1797        | 7  | D 7  | 908.3437        |
| 860.4050  | 430.7061        | 8  | P 6  | 793.3168        |
| 1007.4734 | 504.2403        | 9  | F 5  | 696.2640        |
| 1094.5054 | 547.7563        | 10 | S 4  | 549.1956        |
| 1195.5531 | 598.2802        | 11 | T 3  | 462.1636        |
| 1438.5827 | 719.7950        | 12 | y 2  | 361.1159        |
| ---       | ---             | 13 | V 1  | 118.0863        |

Observed M=1554.6487  
Calculated M=1554.6545

**Figure S17. MS/MS on the doubly charged 778.33 ion. Based on the intact mass (which indicated 1 site of phosphorylation) and the y2 ion, residue 1653 is a phosphotyrosine.**

# Lambda

# MS/MS of peptide LLEAAEQLAQpTGECDPEEIYK

OT10-3466 #3647 RT: 40.03 AV: 1 NL: 1.37E4  
 T: ITMS + c NSI d Full ms2 1216.03@cid35.00 [320.00-2000.00]

|           | b-H <sub>3</sub> PO <sub>4</sub> | b-H <sub>3</sub> PO <sub>4</sub> <sup>+2</sup> | b         | b <sup>+2</sup> |    | y | y <sup>+2</sup> | y-H <sub>3</sub> PO <sub>4</sub> | y-H <sub>3</sub> PO <sub>4</sub> <sup>+2</sup> |           |           |
|-----------|----------------------------------|------------------------------------------------|-----------|-----------------|----|---|-----------------|----------------------------------|------------------------------------------------|-----------|-----------|
| ---       | ---                              | ---                                            | ---       | ---             | 1  | L | 21              | ---                              | ---                                            |           |           |
| ---       | ---                              | ---                                            | 227.1754  | 114.0913        | 2  | L | 20              | 2316.9942                        | 1159.0007                                      | 2219.0173 | 1110.0123 |
| ---       | ---                              | ---                                            | 356.2180  | 178.6126        | 3  | E | 19              | 2203.9101                        | 1102.4587                                      | 2105.9332 | 1053.4702 |
| ---       | ---                              | ---                                            | 427.2551  | 214.1312        | 4  | A | 18              | 2074.8675                        | 1037.9374                                      | 1976.8906 | 988.9489  |
| ---       | ---                              | ---                                            | 498.2922  | 249.6498        | 5  | A | 17              | 2003.8304                        | 1002.4188                                      | 1905.8535 | 953.4304  |
| ---       | ---                              | ---                                            | 627.3348  | 314.1710        | 6  | E | 16              | 1932.7933                        | 966.9003                                       | 1834.8164 | 917.9118  |
| ---       | ---                              | ---                                            | 755.3934  | 378.2003        | 7  | Q | 15              | 1803.7507                        | 902.3790                                       | 1705.7738 | 853.3905  |
| ---       | ---                              | ---                                            | 868.4775  | 434.7424        | 8  | L | 14              | 1675.6921                        | 838.3497                                       | 1577.7152 | 789.3612  |
| ---       | ---                              | ---                                            | 939.5146  | 470.2609        | 9  | A | 13              | 1562.6080                        | 781.8077                                       | 1464.6311 | 732.8192  |
| ---       | ---                              | ---                                            | 1067.5732 | 534.2902        | 10 | Q | 12              | 1491.5709                        | 746.2891                                       | 1393.5940 | 697.3006  |
| 1150.6103 | 575.8088                         | 1248.5872                                      | 624.7972  | 653.3080        | 11 | t | 11              | 1363.5123                        | 682.2598                                       | 1265.5354 | 633.2714  |
| 1207.6317 | 604.3195                         | 1305.6086                                      | 717.8292  | 769.3338        | 12 | G | 10              | 1182.4983                        | 591.7528                                       | ---       | ---       |
| 1336.6743 | 668.8408                         | 1434.6512                                      | 826.8473  | 875.3737        | 13 | E | 9               | 1125.4769                        | 563.2421                                       | ---       | ---       |
| 1439.6835 | 720.3454                         | 1537.6604                                      | 939.8950  | 1004.4163       | 14 | C | 8               | 996.4343                         | 498.7208                                       | ---       | ---       |
| 1554.7104 | 777.8589                         | 1652.6873                                      | 1060.9583 | 1142.4900       | 15 | D | 7               | 893.4251                         | 447.2162                                       | ---       | ---       |
| 1651.7632 | 826.3852                         | 1749.7401                                      | 1185.8227 | 1248.5872       | 16 | P | 6               | 778.3981                         | 389.7027                                       | ---       | ---       |
| 1780.8058 | 890.9065                         | 1878.7827                                      | 1305.6086 | 1377.8292       | 17 | E | 5               | 681.3454                         | 341.1763                                       | ---       | ---       |
| 1909.8484 | 955.4278                         | 2007.8253                                      | 1434.6512 | 1477.8292       | 18 | E | 4               | 552.3028                         | 276.6550                                       | ---       | ---       |
| 2022.9325 | 1011.9699                        | 2120.9094                                      | 1562.6873 | 1577.8292       | 19 | I | 3               | 423.2602                         | 212.1337                                       | ---       | ---       |
| 2185.9958 | 1093.5015                        | 2283.9727                                      | 1682.6080 | 1675.6921       | 20 | Y | 2               | 310.1761                         | 155.5917                                       | ---       | ---       |
| ---       | ---                              | ---                                            | ---       | ---             | 21 | K | 1               | 147.1128                         | 74.0600                                        | ---       | ---       |

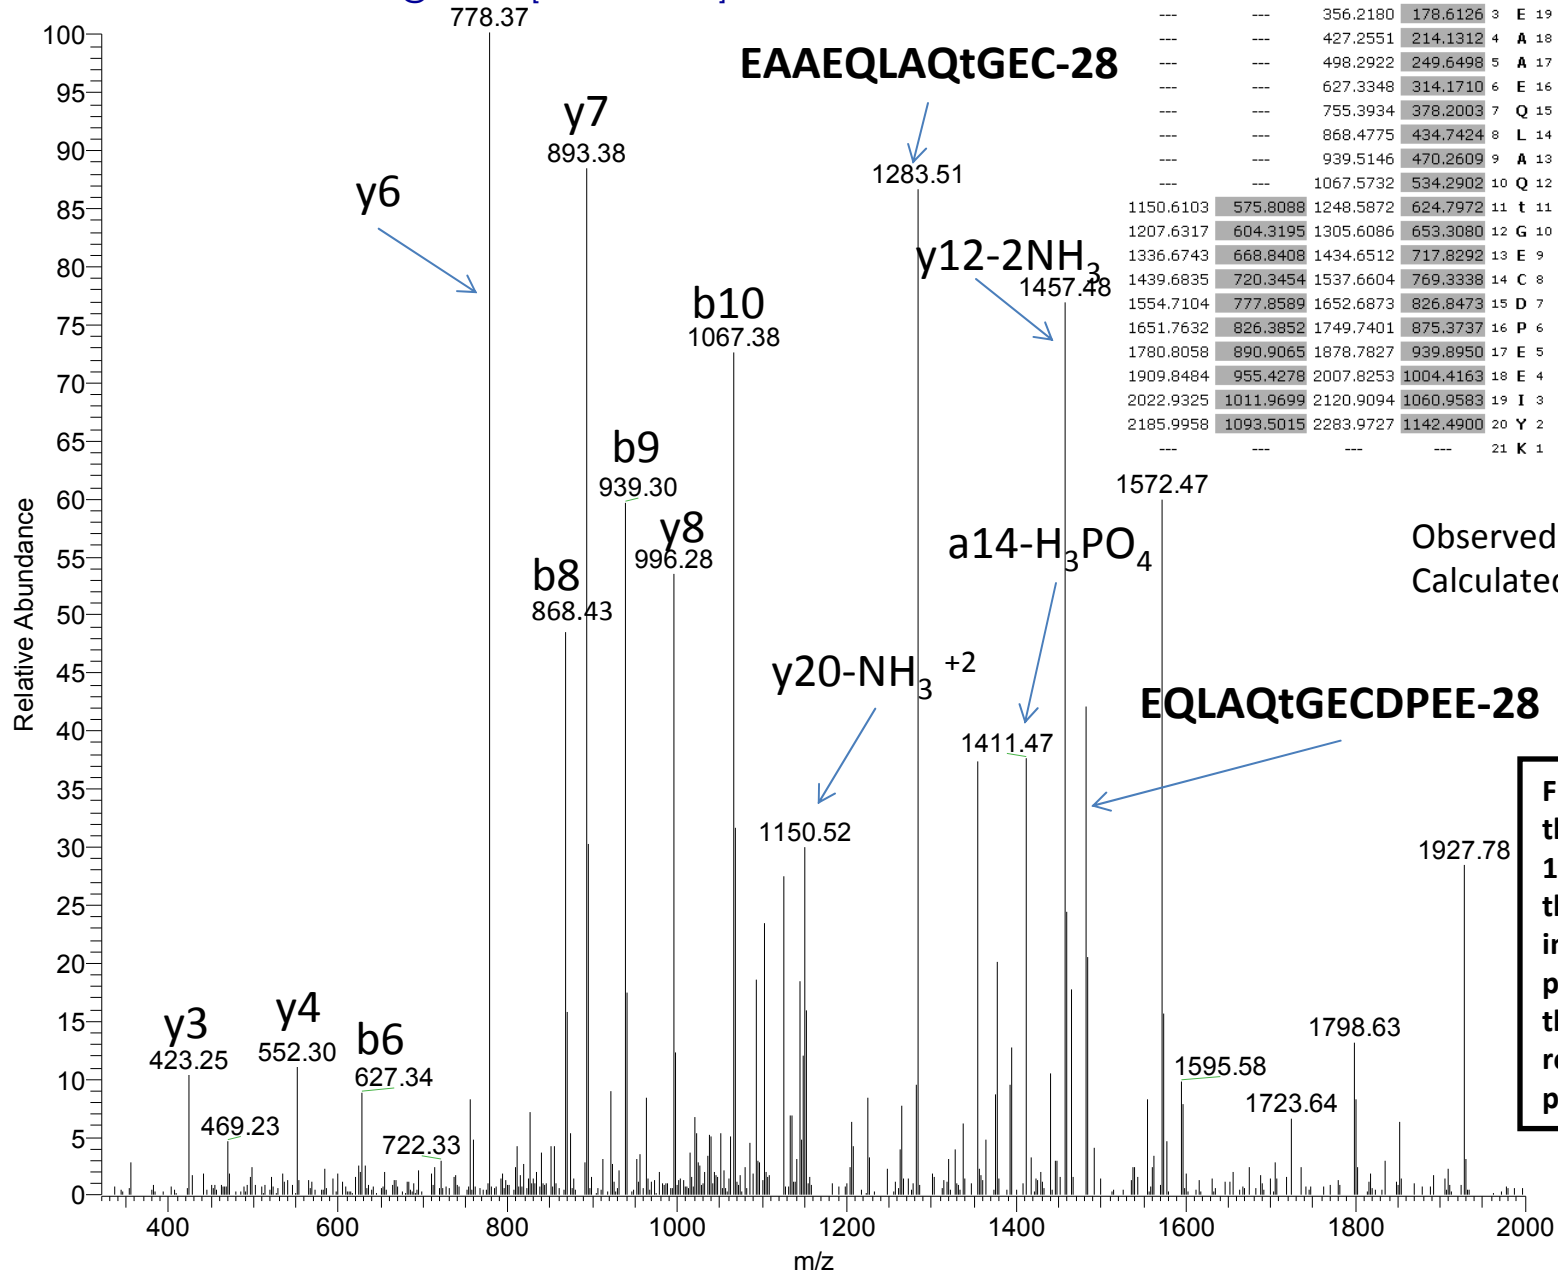

Observed M=2429.0478  
 Calculated M=2429.0709

Figure S18. MS/MS on the doubly charged 1216.03 ion. Based on the intact mass (which indicated 1 site of phosphorylation) and the b10 and y ions, residue 607 is a phosphothreonine.

# Lambda

# MS/MS of peptide EVLEDVCADpSVDAVQELIK

OT10-3466 #4489 RT: 46.70 AV: 1 NL: 6.81E3  
 T: ITMS + c NSI d Full ms2 1078.49@cid35.00 [285.00-2000.00]

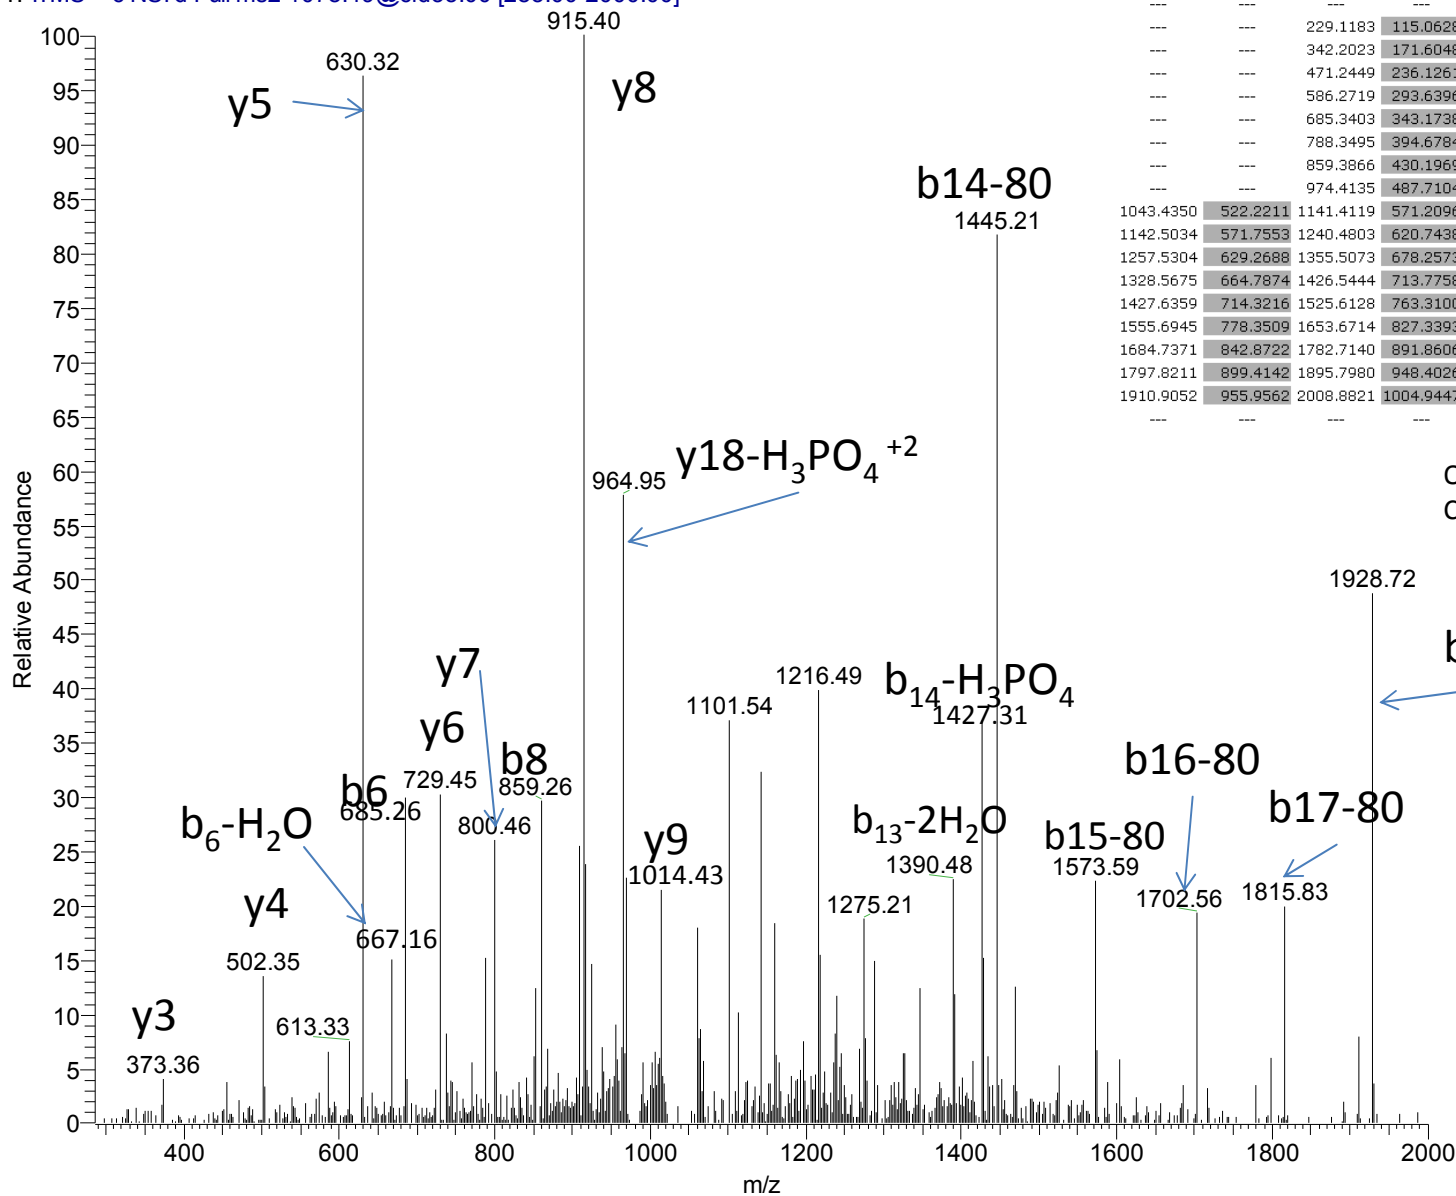

| b-H <sub>3</sub> PO <sub>4</sub> | b-H <sub>3</sub> PO <sub>4</sub> <sup>+2</sup> | b         | b <sup>+2</sup> | y                 | y <sup>+2</sup> | y-H <sub>3</sub> PO <sub>4</sub> | y-H <sub>3</sub> PO <sub>4</sub> <sup>+2</sup> |
|----------------------------------|------------------------------------------------|-----------|-----------------|-------------------|-----------------|----------------------------------|------------------------------------------------|
| ---                              | ---                                            | ---       | ---             | 1 E 19            | ---             | ---                              | ---                                            |
| ---                              | ---                                            | 229.1183  | 115.0628        | 2 V 18 2025.9450  | 1013.4761       | 1927.9681                        | 964.4877                                       |
| ---                              | ---                                            | 342.2023  | 171.6048        | 3 L 17 1926.8766  | 963.9419        | 1828.8997                        | 914.9535                                       |
| ---                              | ---                                            | 471.2449  | 236.1261        | 4 E 16 1813.7925  | 907.3999        | 1715.8156                        | 858.4115                                       |
| ---                              | ---                                            | 586.2719  | 293.6396        | 5 D 15 1684.7499  | 842.8786        | 1586.7730                        | 793.8902                                       |
| ---                              | ---                                            | 685.3403  | 343.1738        | 6 V 14 1569.7230  | 785.3651        | 1471.7461                        | 736.3767                                       |
| ---                              | ---                                            | 788.3495  | 394.6784        | 7 C 13 1470.6546  | 735.8309        | 1372.6777                        | 686.8425                                       |
| ---                              | ---                                            | 859.3866  | 430.1969        | 8 A 12 1367.6454  | 684.3263        | 1269.6685                        | 635.3379                                       |
| ---                              | ---                                            | 974.4135  | 487.7104        | 9 D 11 1296.6083  | 648.8078        | 1198.6314                        | 599.8193                                       |
| 1043.4350                        | 522.2211                                       | 1141.4119 | 571.2096        | 10 S 10 1181.5813 | 591.2943        | 1083.6045                        | 542.3059                                       |
| 1142.5034                        | 571.7553                                       | 1240.4803 | 620.7438        | 11 V 9 1014.5830  | 507.7951        | ---                              | ---                                            |
| 1257.5304                        | 629.2688                                       | 1355.5073 | 678.2573        | 12 D 8 915.5146   | 458.2609        | ---                              | ---                                            |
| 1328.5675                        | 664.7874                                       | 1426.5444 | 713.7758        | 13 A 7 800.4876   | 400.7475        | ---                              | ---                                            |
| 1427.6359                        | 714.3216                                       | 1525.6128 | 763.3100        | 14 V 6 729.4505   | 365.2289        | ---                              | ---                                            |
| 1555.6945                        | 778.3509                                       | 1653.6714 | 827.3393        | 15 Q 5 630.3821   | 315.6947        | ---                              | ---                                            |
| 1684.7371                        | 842.8722                                       | 1782.7140 | 891.8606        | 16 E 4 502.3235   | 251.6654        | ---                              | ---                                            |
| 1797.8211                        | 899.4142                                       | 1895.7980 | 948.4026        | 17 L 3 373.2809   | 187.1441        | ---                              | ---                                            |
| 1910.9052                        | 955.9562                                       | 2008.8821 | 1004.9447       | 18 I 2 260.1969   | 130.6021        | ---                              | ---                                            |
| ---                              | ---                                            | ---       | ---             | 19 K 1 147.1128   | 74.0600         | ---                              | ---                                            |

Observed M=2153.9606  
 Calculated M=2153.9803

**Figure S19. MS/MS on the doubly charged 1078.49 ion. Based on the intact mass (which indicated 1 site of phosphorylation) and the b14-H<sub>3</sub>PO<sub>4</sub> and b-80 ions, residue 672 is a phosphoserine.**

# Lambda

# MS/MS of peptide LLpTSELGVTEHVEGDPCCK

U110-5400 #5178 RT: 36.55 AV: 1 NL: 5.54E4

T: ITMS + c NSI d Full ms2 1004.45@cid35.00 [265.00-2000.00]

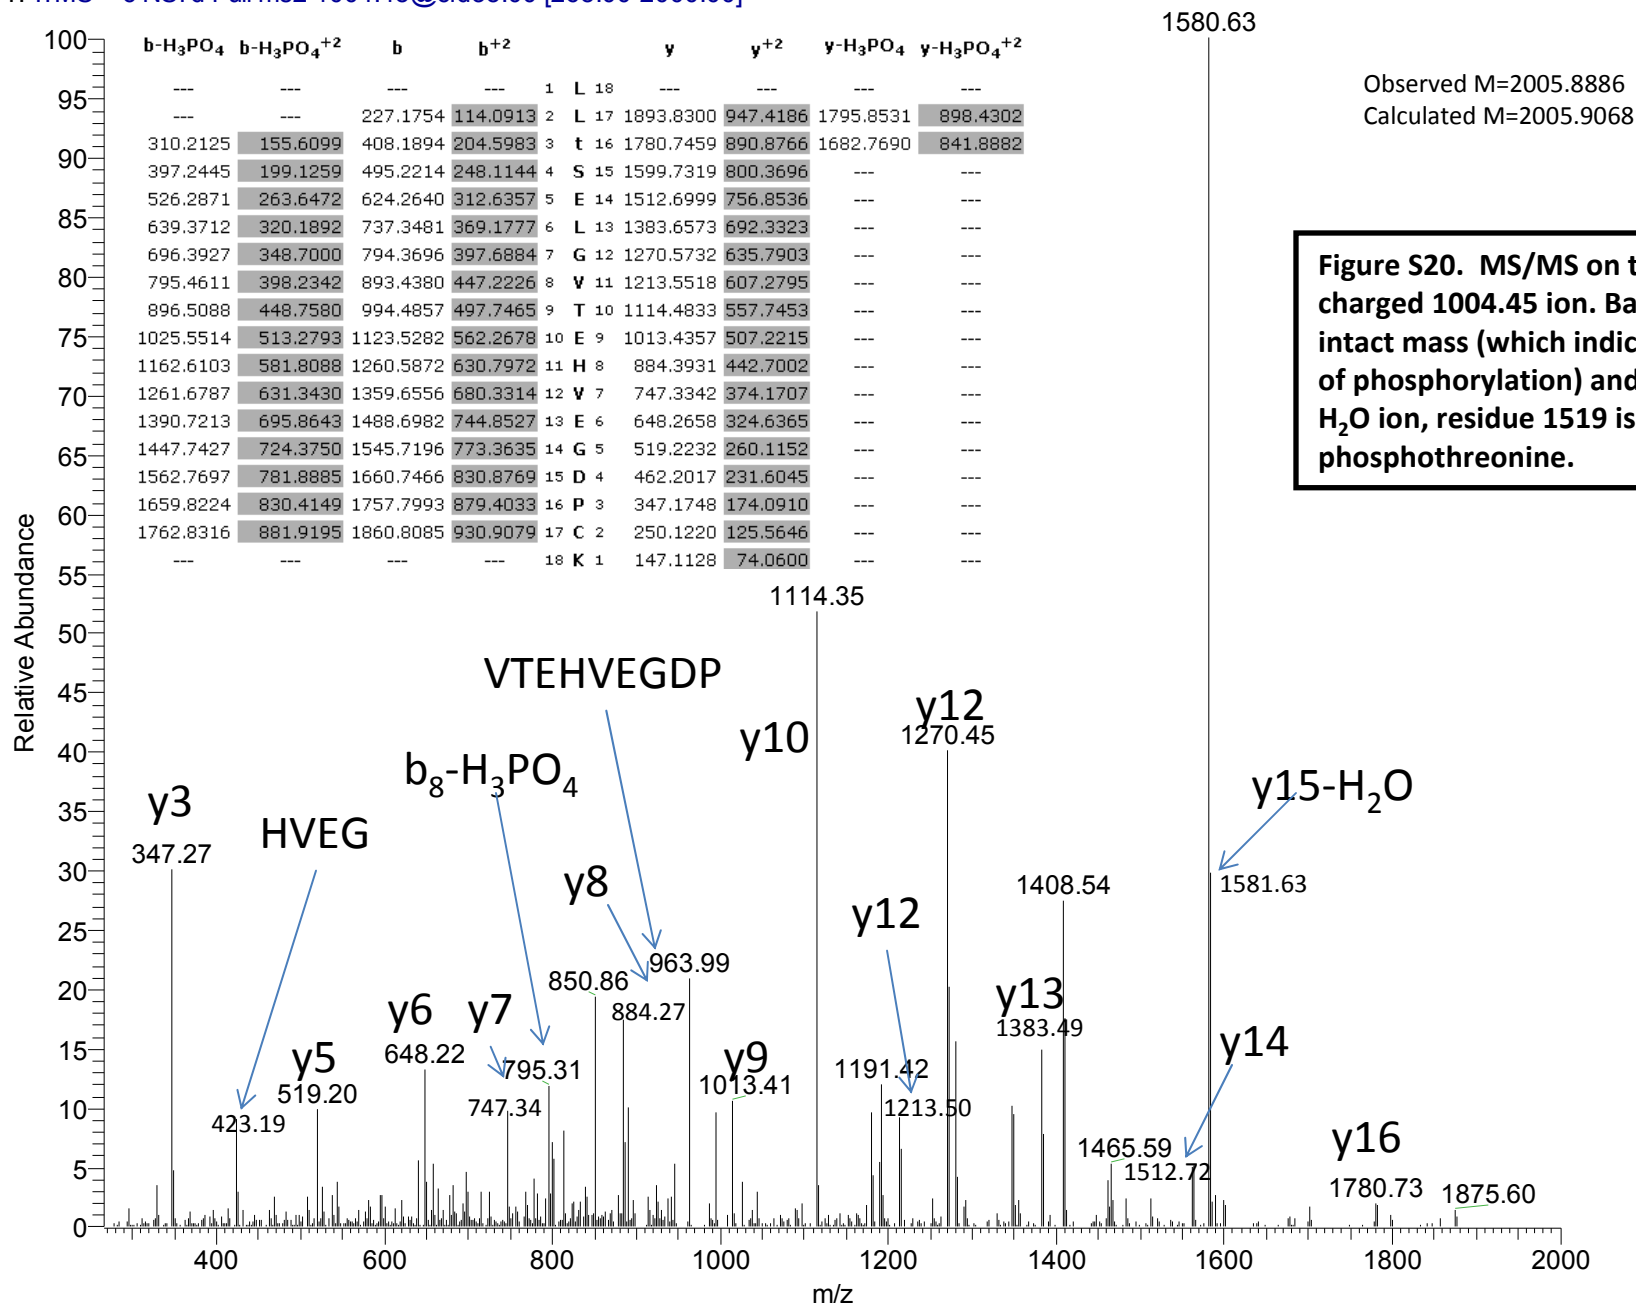

Observed M=2005.8886  
Calculated M=2005.9068

**Figure S20. MS/MS on the doubly charged 1004.45 ion. Based on the intact mass (which indicated 1 site of phosphorylation) and the y15-H<sub>2</sub>O ion, residue 1519 is a phosphothreonine.**

**CIP**

**MS/MS of peptide AEALLQAGHYDADAIRECAEK**

OT10-3490 #3014 RT: 35.41 AV: 1 NL: 2.01E4  
 T: ITMS + c NSI d Full ms2 1178.02@cid35.00 [310.00-2000.00]

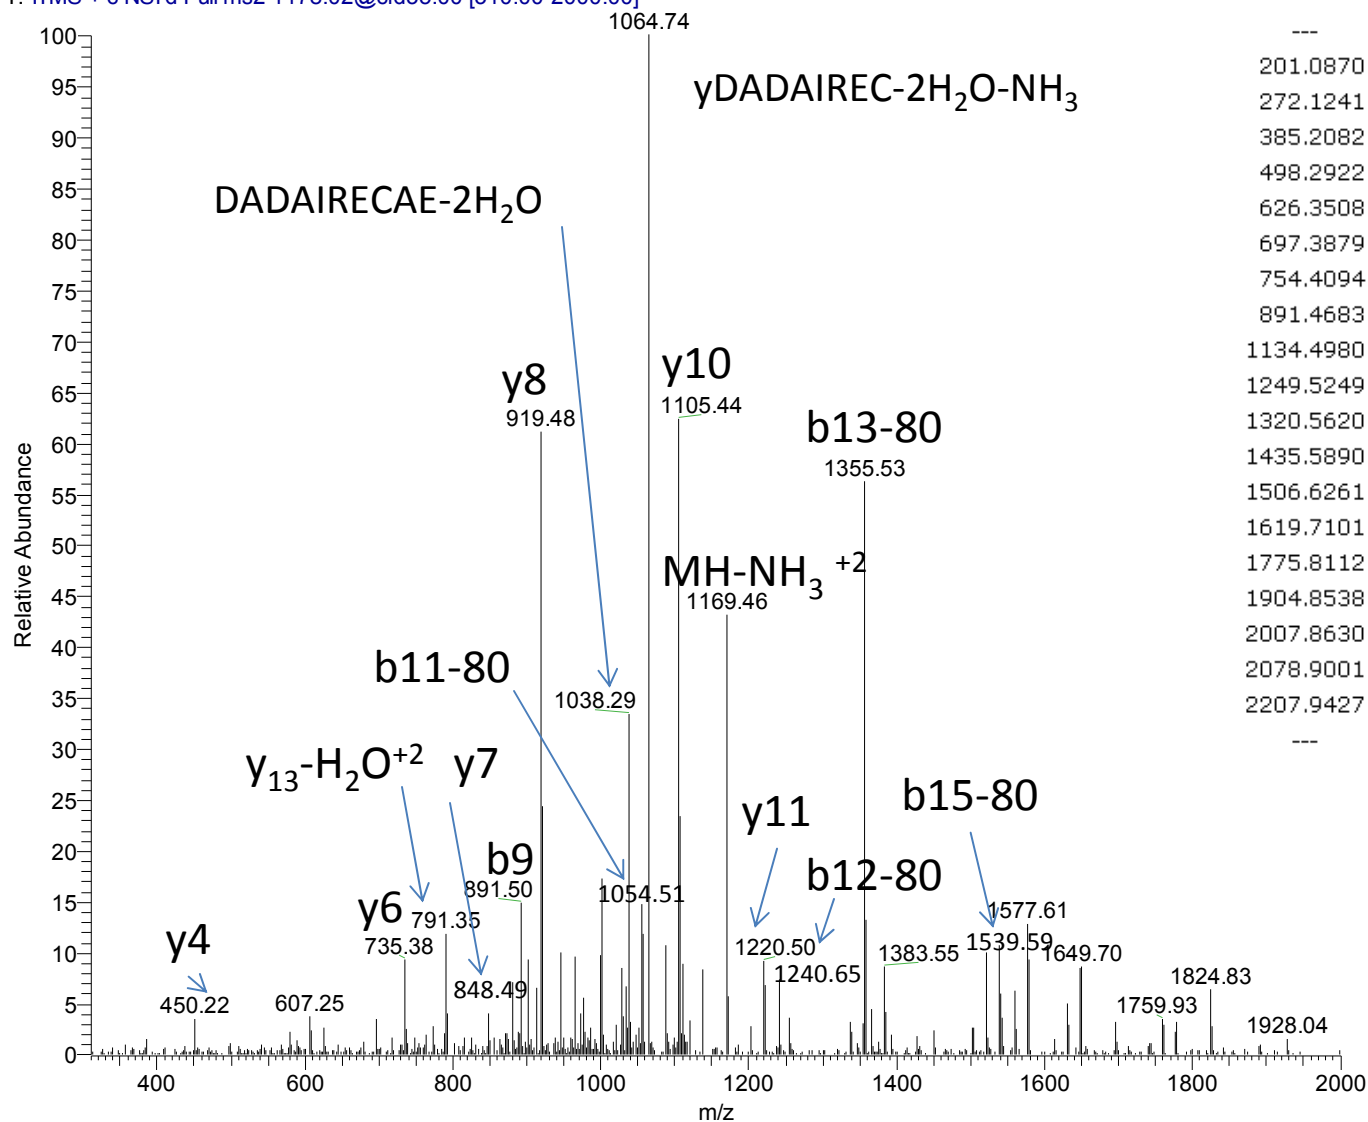

| b         | b <sup>+2</sup> |    | y    | y <sup>+2</sup>     |
|-----------|-----------------|----|------|---------------------|
| ---       | ---             | 1  | A 21 | ---                 |
| 201.0870  | 101.0471        | 2  | E 20 | 2283.0111 1142.0092 |
| 272.1241  | 136.5657        | 3  | A 19 | 2153.9685 1077.4879 |
| 385.2082  | 193.1077        | 4  | L 18 | 2082.9314 1041.9694 |
| 498.2922  | 249.6498        | 5  | L 17 | 1969.8474 985.4273  |
| 626.3508  | 313.6790        | 6  | Q 16 | 1856.7633 928.8853  |
| 697.3879  | 349.1976        | 7  | A 15 | 1728.7047 864.8560  |
| 754.4094  | 377.7083        | 8  | G 14 | 1657.6676 829.3374  |
| 891.4683  | 446.2378        | 9  | H 13 | 1600.6461 800.8267  |
| 1134.4980 | 567.7526        | 10 | y 12 | 1463.5872 732.2973  |
| 1249.5249 | 625.2661        | 11 | D 11 | 1220.5576 610.7824  |
| 1320.5620 | 660.7846        | 12 | A 10 | 1105.5306 553.2690  |
| 1435.5890 | 718.2981        | 13 | D 9  | 1034.4935 517.7504  |
| 1506.6261 | 753.8167        | 14 | A 8  | 919.4666 460.2369   |
| 1619.7101 | 810.3587        | 15 | I 7  | 848.4295 424.7184   |
| 1775.8112 | 888.4093        | 16 | R 6  | 735.3454 368.1763   |
| 1904.8538 | 952.9306        | 17 | E 5  | 579.2443 290.1258   |
| 2007.8630 | 1004.4351       | 18 | C 4  | 450.2017 225.6045   |
| 2078.9001 | 1039.9537       | 19 | A 3  | 347.1925 174.0999   |
| 2207.9427 | 1104.4750       | 20 | E 2  | 276.1554 138.5813   |
| ---       | ---             | 21 | K 1  | 147.1128 74.0600    |

Observed M=2353.0228  
 Calculated M=2353.0409

**Figure S21. MS/MS on the doubly charged 1178.02 ion. Based on the intact mass (which indicated 1 site of phosphorylation) and the b ions, residue 963 is a phosphotyrosine**

# CIP

## MS/MS of peptide pYEQLPEDVGHCFTWADK

OT10-3490 #3979 RT: 43.10 AV: 1 NL: 1.22E4  
T: ITMS + c NSI d Full ms2 1108.97@cid35.00 [295.00-2000.00]

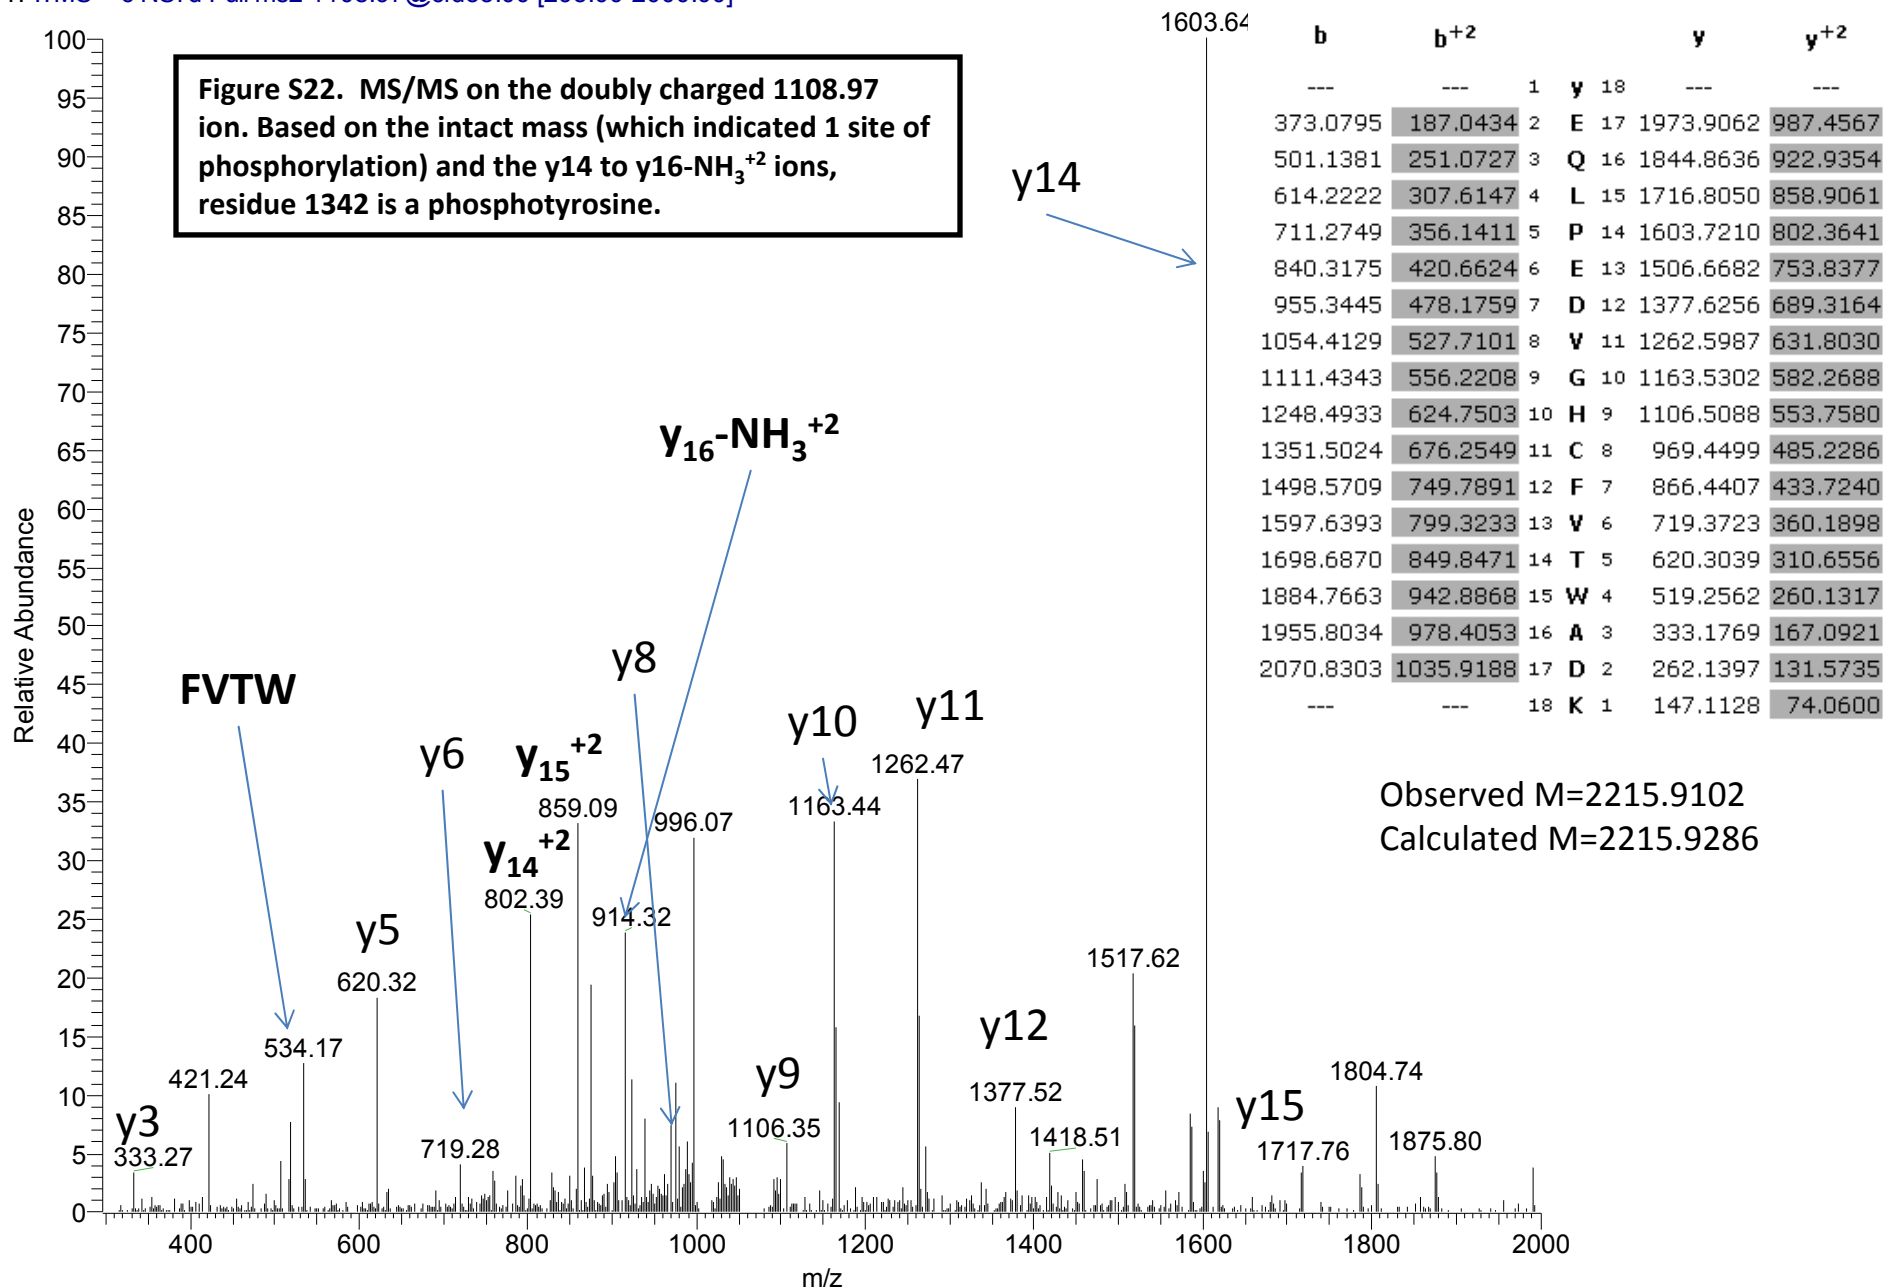

pEAK Rapid Cells AV: 1 NL: 9.86E3  
 .48@cid35.00 [245.00-2000.00]

### MS/MS of Peptide K.ALLDVLQRRLpSPGNSESLTATANYSK.A

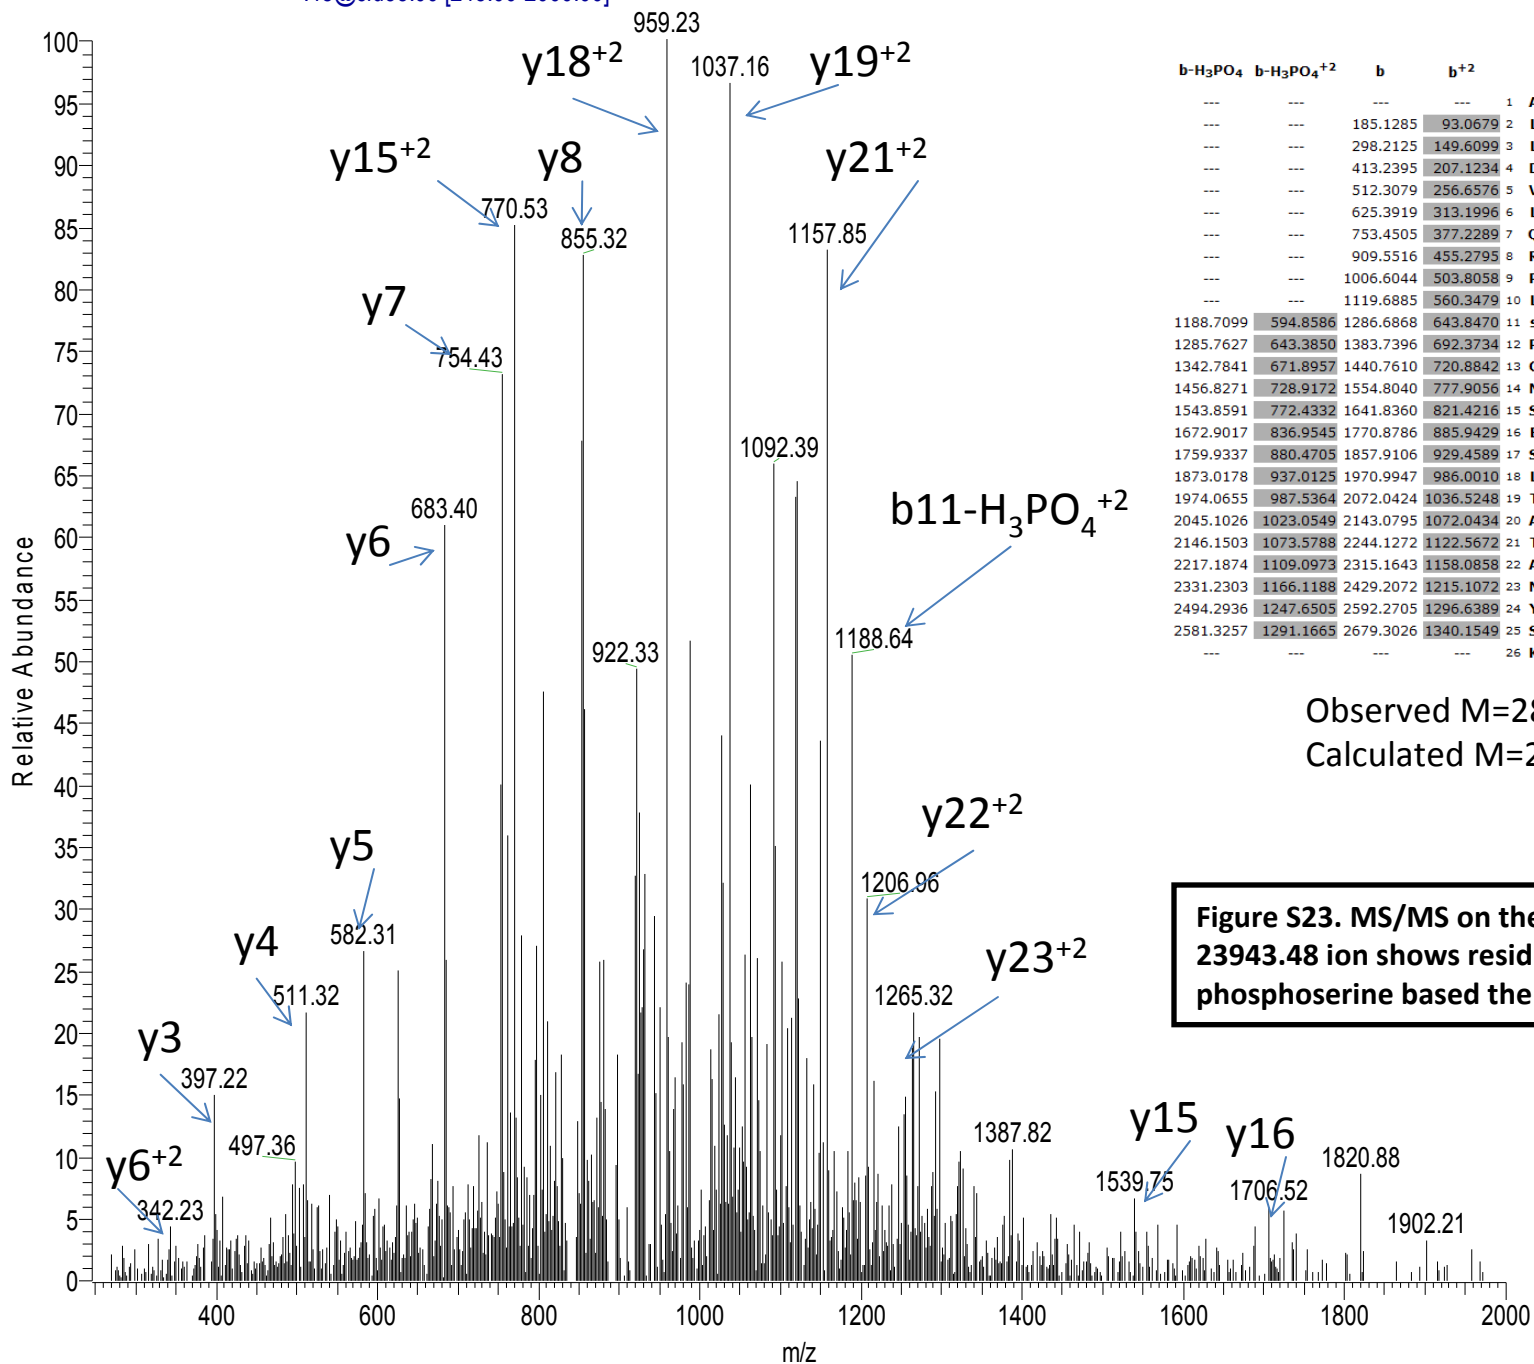

| b-H <sub>3</sub> PO <sub>4</sub> | b-H <sub>3</sub> PO <sub>4</sub> <sup>+2</sup> | b         | b <sup>+2</sup> |    | y    | y <sup>+2</sup> | y-H <sub>3</sub> PO <sub>4</sub> | y-H <sub>3</sub> PO <sub>4</sub> <sup>+2</sup> |
|----------------------------------|------------------------------------------------|-----------|-----------------|----|------|-----------------|----------------------------------|------------------------------------------------|
| ---                              | ---                                            | ---       | ---             | 1  | A 26 | ---             | ---                              | ---                                            |
| ---                              | ---                                            | 185.1285  | 93.0679         | 2  | L 25 | 2754.3710       | 1377.6891                        | 2656.3941                                      |
| ---                              | ---                                            | 298.2125  | 149.6099        | 3  | L 24 | 2641.2869       | 1321.1471                        | 2543.3100                                      |
| ---                              | ---                                            | 413.2395  | 207.1234        | 4  | D 23 | 2528.2028       | 1264.6051                        | 2430.2259                                      |
| ---                              | ---                                            | 512.3079  | 256.6576        | 5  | V 22 | 2413.1759       | 1207.0916                        | 2315.1990                                      |
| ---                              | ---                                            | 625.3919  | 313.1996        | 6  | L 21 | 2314.1075       | 1157.5574                        | 2216.1306                                      |
| ---                              | ---                                            | 753.4505  | 377.2289        | 7  | Q 20 | 2201.0234       | 1101.0153                        | 2103.0465                                      |
| ---                              | ---                                            | 909.5516  | 455.2795        | 8  | R 19 | 2072.9648       | 1036.9861                        | 1974.9879                                      |
| ---                              | ---                                            | 1006.6044 | 503.8058        | 9  | P 18 | 1916.8637       | 958.9355                         | 1818.8868                                      |
| ---                              | ---                                            | 1119.6885 | 560.3479        | 10 | L 17 | 1819.8110       | 910.4091                         | 1721.8341                                      |
| 1188.7099                        | 594.8586                                       | 1286.6868 | 643.8470        | 11 | S 16 | 1706.7269       | 853.8671                         | 1608.7500                                      |
| 1285.7627                        | 643.3850                                       | 1383.7396 | 692.3734        | 12 | P 15 | 1539.7285       | 770.3679                         | ---                                            |
| 1342.7841                        | 671.8957                                       | 1440.7610 | 720.8842        | 13 | G 14 | 1442.6758       | 721.8415                         | ---                                            |
| 1456.8271                        | 728.9172                                       | 1554.8040 | 777.9056        | 14 | N 13 | 1385.6543       | 693.3308                         | ---                                            |
| 1543.8591                        | 772.4332                                       | 1641.8360 | 821.4216        | 15 | S 12 | 1271.6114       | 636.3093                         | ---                                            |
| 1672.9017                        | 836.9545                                       | 1770.8786 | 885.9429        | 16 | E 11 | 1184.5794       | 592.7933                         | ---                                            |
| 1759.9337                        | 880.4705                                       | 1857.9106 | 929.4589        | 17 | S 10 | 1055.5368       | 528.2720                         | ---                                            |
| 1873.0178                        | 937.0125                                       | 1970.9947 | 986.0010        | 18 | L 9  | 968.5047        | 484.7560                         | ---                                            |
| 1974.0655                        | 987.5364                                       | 2072.0424 | 1036.5248       | 19 | T 8  | 855.4207        | 428.2140                         | ---                                            |
| 2045.1026                        | 1023.0549                                      | 2143.0795 | 1072.0434       | 20 | A 7  | 754.3730        | 377.6901                         | ---                                            |
| 2146.1503                        | 1073.5788                                      | 2244.1272 | 1122.5672       | 21 | T 6  | 683.3359        | 342.1716                         | ---                                            |
| 2217.1874                        | 1109.0973                                      | 2315.1643 | 1158.0858       | 22 | A 5  | 582.2882        | 291.6477                         | ---                                            |
| 2331.2303                        | 1166.1188                                      | 2429.2072 | 1215.1072       | 23 | N 4  | 511.2511        | 256.1292                         | ---                                            |
| 2494.2936                        | 1247.6505                                      | 2592.2705 | 1296.6389       | 24 | Y 3  | 397.2082        | 199.1077                         | ---                                            |
| 2581.3257                        | 1291.1665                                      | 2679.3026 | 1340.1549       | 25 | S 2  | 234.1448        | 117.5761                         | ---                                            |
| ---                              | ---                                            | ---       | ---             | 26 | K 1  | 147.1128        | 74.0600                          | ---                                            |

Observed M=2824.3990  
 Calculated M=2824.4008

**Figure S23. MS/MS on the triply charged 23943.48 ion shows residue 487 is a phosphoserine based the y15<sup>+2</sup> ion.**

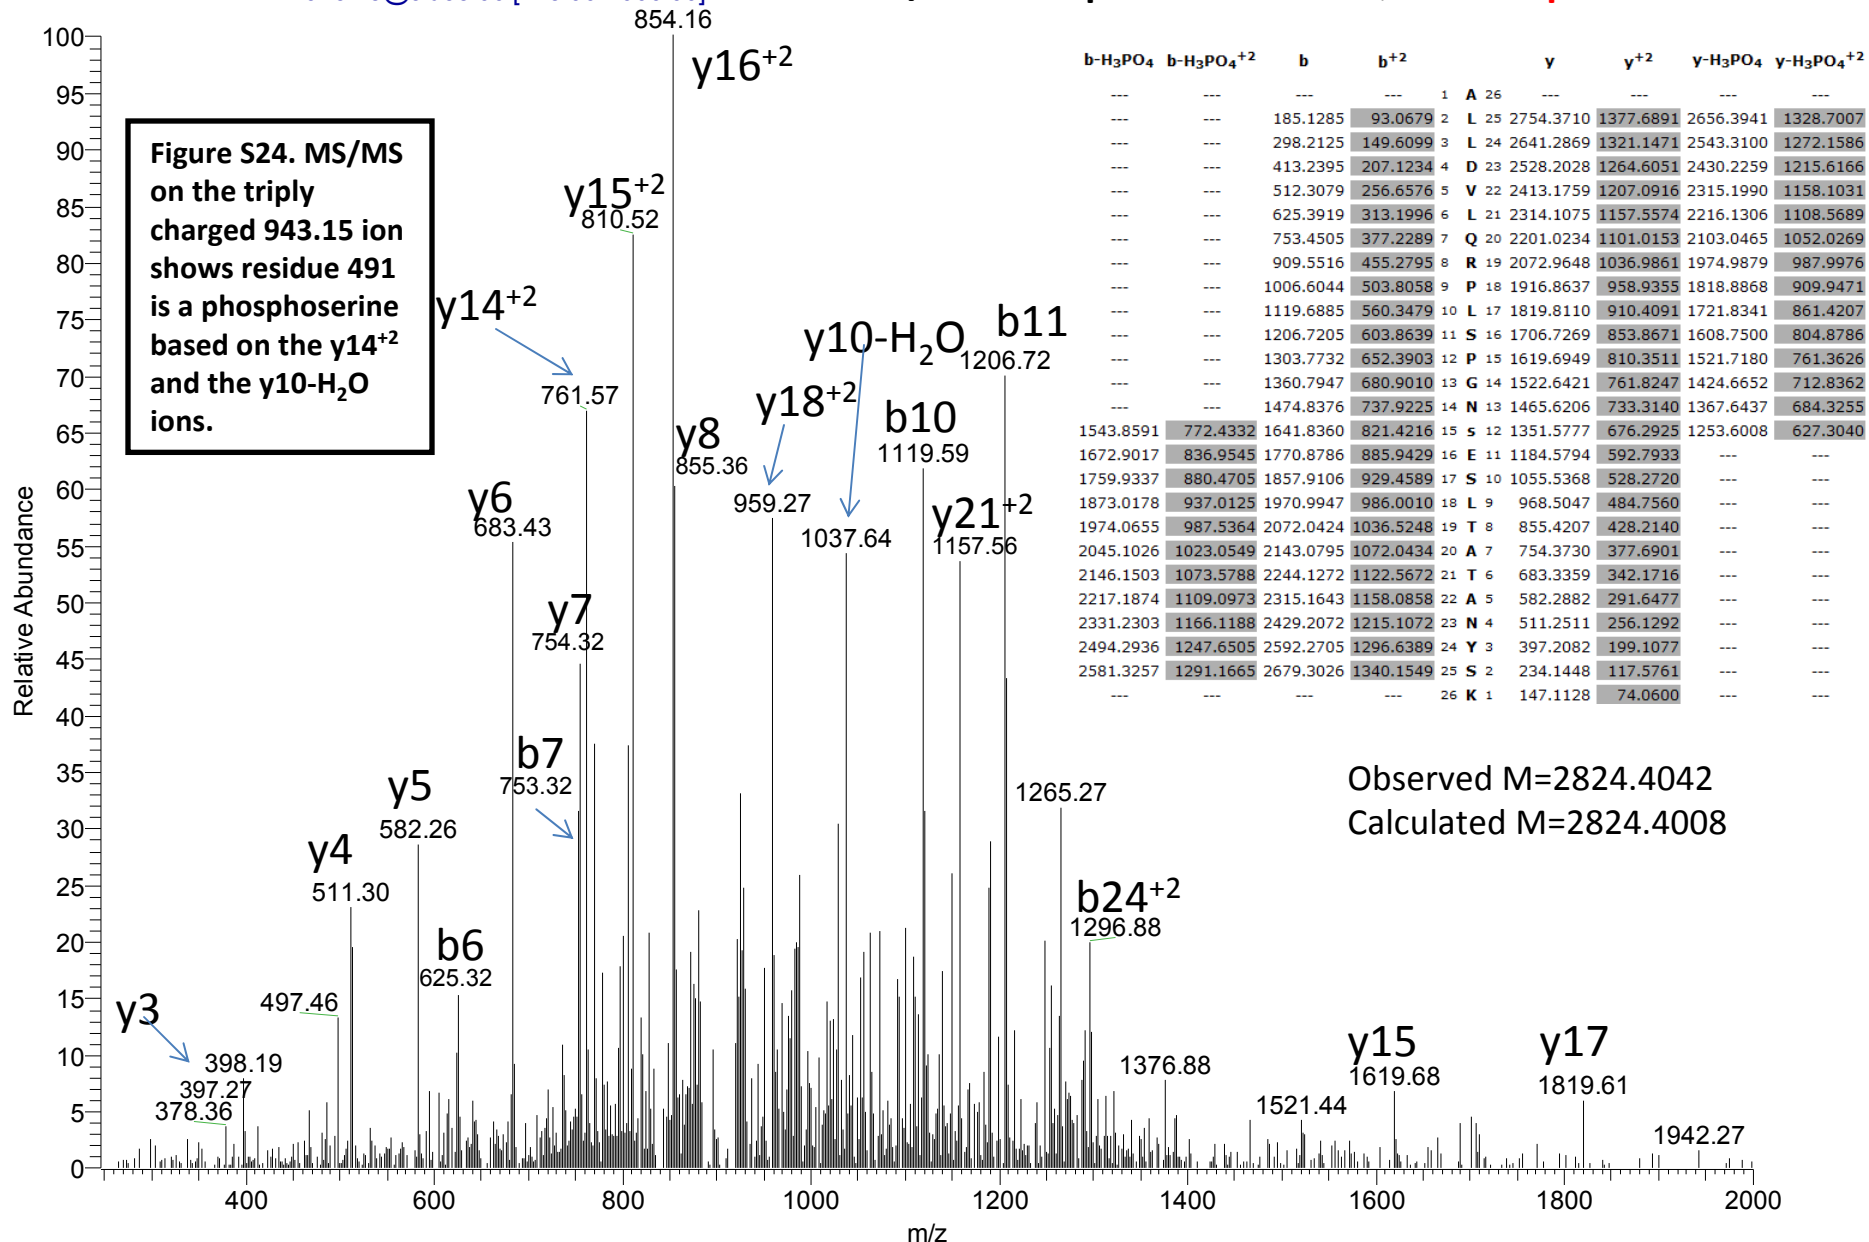



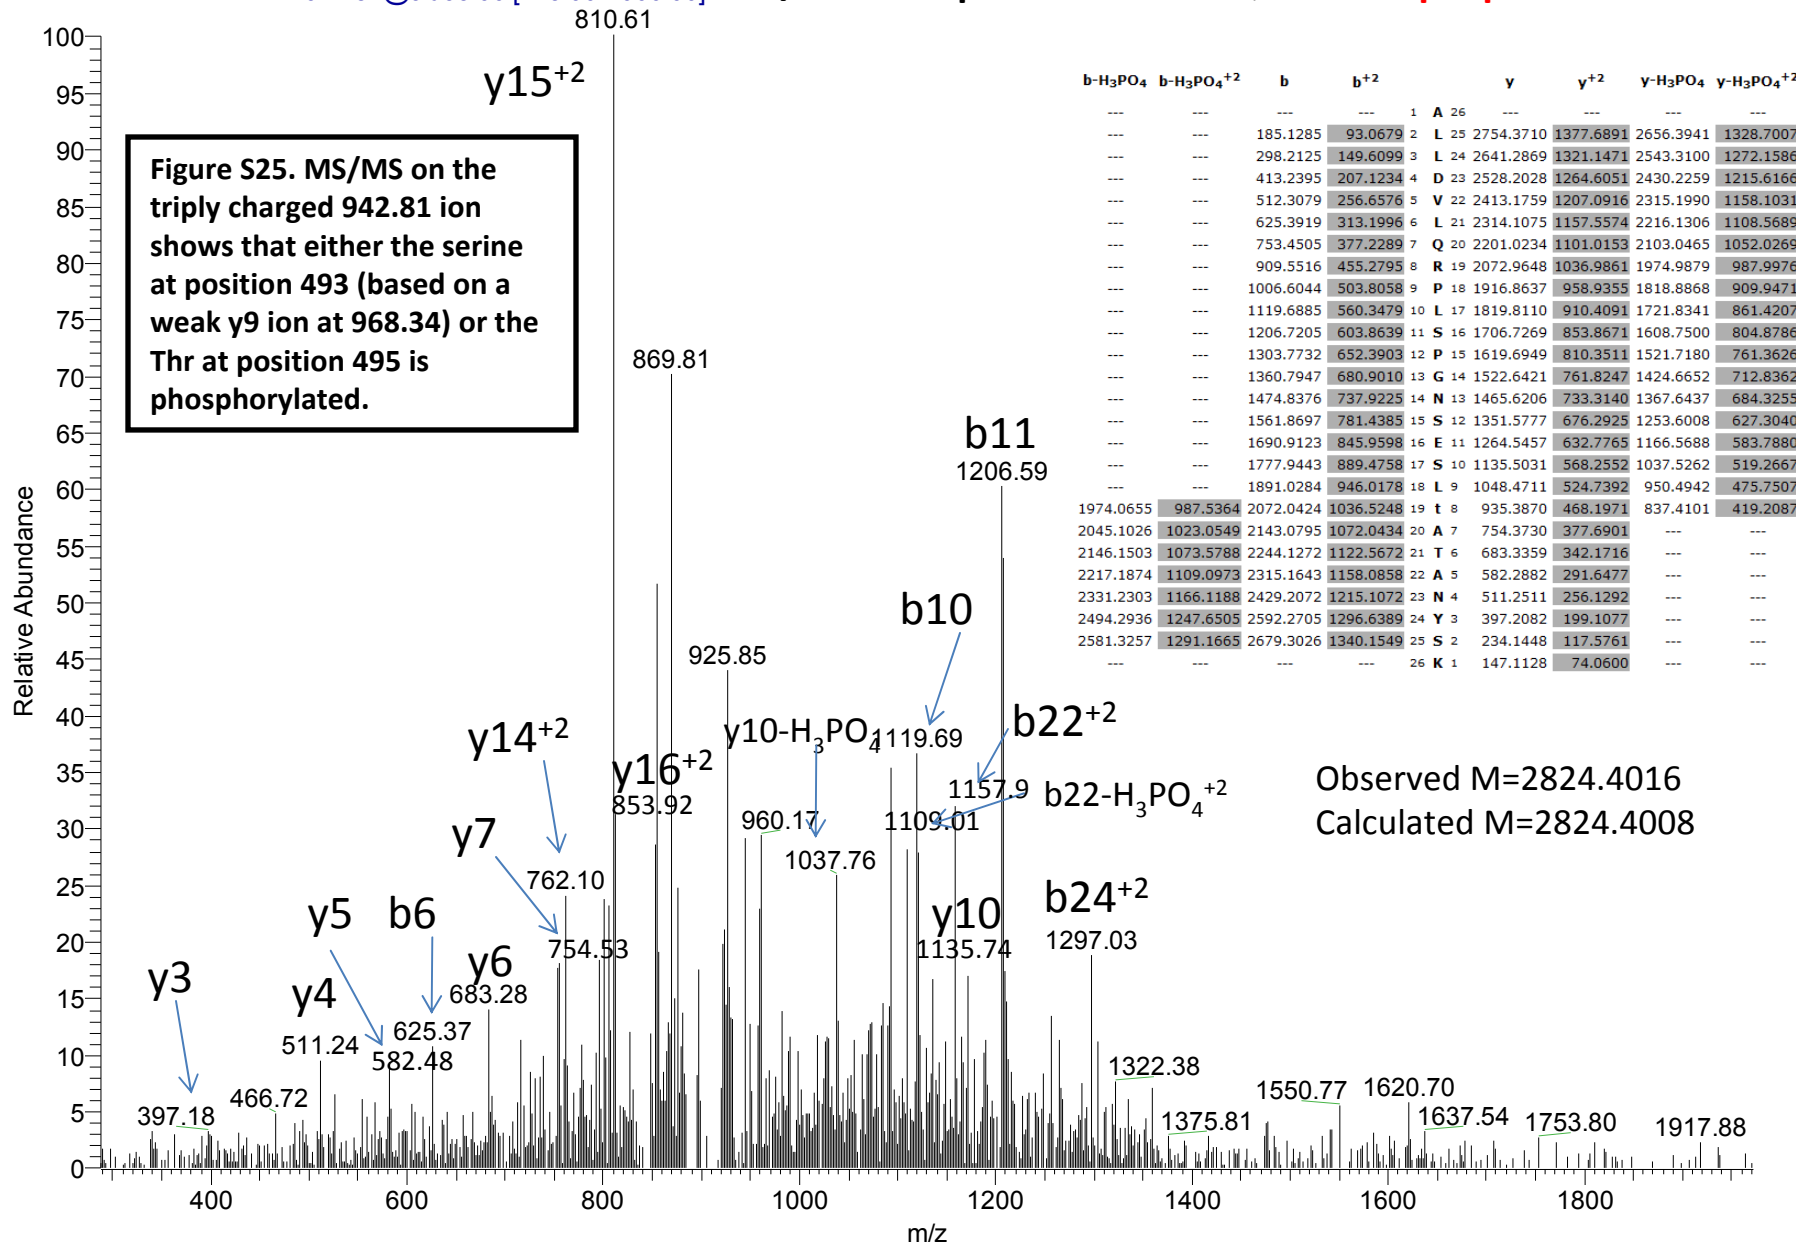

# pEAK Rapid Cells

I: ITMS + c NSI d Full ms2 696.31@cid35.00 [180.00-1405.00]

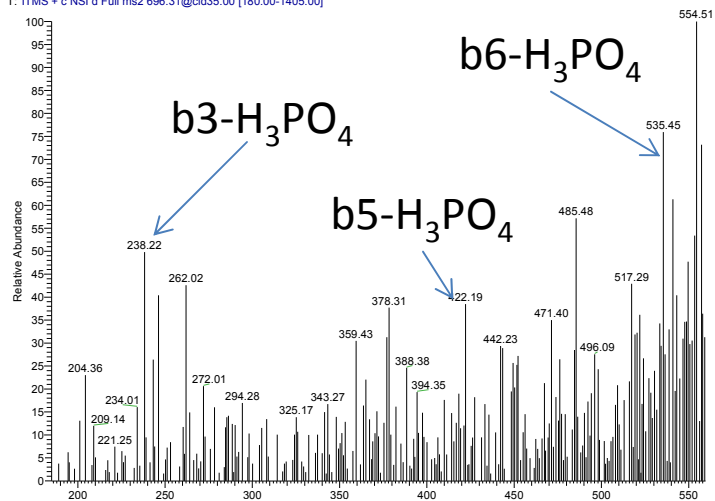

OT09-0068 #1929 RT: 26.13 AV: 1 NL: 1.57E3  
T: ITMS + c NSI d Full ms2 696.31@cid35.00 [180.00-1405.00]

# MS/MS of Peptide R.pSAPPSLGEPTEAR.D

| b-H <sub>3</sub> PO <sub>4</sub> | b-H <sub>3</sub> PO <sub>4</sub> <sup>+2</sup> | b         | b <sup>+2</sup> |    | y    | y <sup>+2</sup> |
|----------------------------------|------------------------------------------------|-----------|-----------------|----|------|-----------------|
| ---                              | ---                                            | ---       | ---             | 1  | S 13 | ---             |
| 141.0659                         | 71.0366                                        | 239.0427  | 120.0250        | 2  | A 12 | 1224.6219       |
| 238.1186                         | 119.5629                                       | 336.0955  | 168.5514        | 3  | P 11 | 1153.5848       |
| 335.1714                         | 168.0893                                       | 433.1483  | 217.0778        | 4  | P 10 | 1056.5320       |
| 422.2034                         | 211.6053                                       | 520.1803  | 260.5938        | 5  | S 9  | 959.4793        |
| 535.2875                         | 268.1474                                       | 633.2644  | 317.1358        | 6  | L 8  | 872.4472        |
| 592.3089                         | 296.6581                                       | 690.2858  | 345.6466        | 7  | G 7  | 759.3632        |
| 721.3515                         | 361.1794                                       | 819.3284  | 410.1679        | 8  | E 6  | 702.3417        |
| 818.4043                         | 409.7058                                       | 916.3812  | 458.6942        | 9  | P 5  | 573.2991        |
| 919.4520                         | 460.2296                                       | 1017.4289 | 509.2181        | 10 | T 4  | 476.2463        |
| 1048.4946                        | 524.7509                                       | 1146.4715 | 573.7394        | 11 | E 3  | 375.1987        |
| 1119.5317                        | 560.2695                                       | 1217.5086 | 609.2579        | 12 | A 2  | 246.1561        |
| ---                              | ---                                            | ---       | ---             | 13 | R 1  | 175.1190        |
|                                  |                                                |           |                 |    |      | 88.0631         |

Observed M=1390.6141  
Calculated M=1390.6129

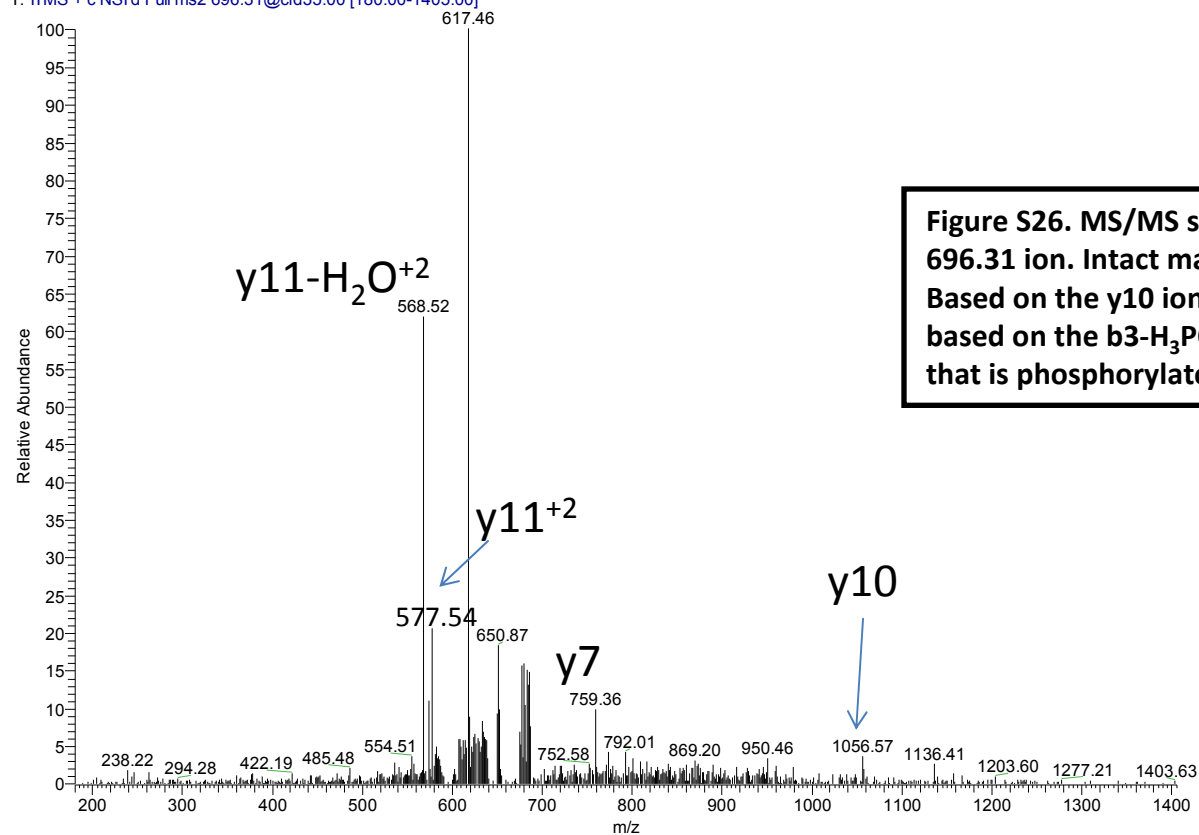

Figure S26. MS/MS spectra of doubly charged 696.31 ion. Intact mass indicates one site of phosphorylation. Based on the y10 ion, the threonine is not phosphorylated; based on the b3-H<sub>3</sub>PO<sub>4</sub> ion, it is the first serine at residue 710 that is phosphorylated.

pEAK Rapid Cells

1 AV: 1 NL: 1.00E3  
 T: ITMS + c NSI d Full ms2 1105.01@cid35.00 [290.00-2000.00]

MS/MS of Peptide R.SAPPSLGEPTEARpSAVSNNK.T

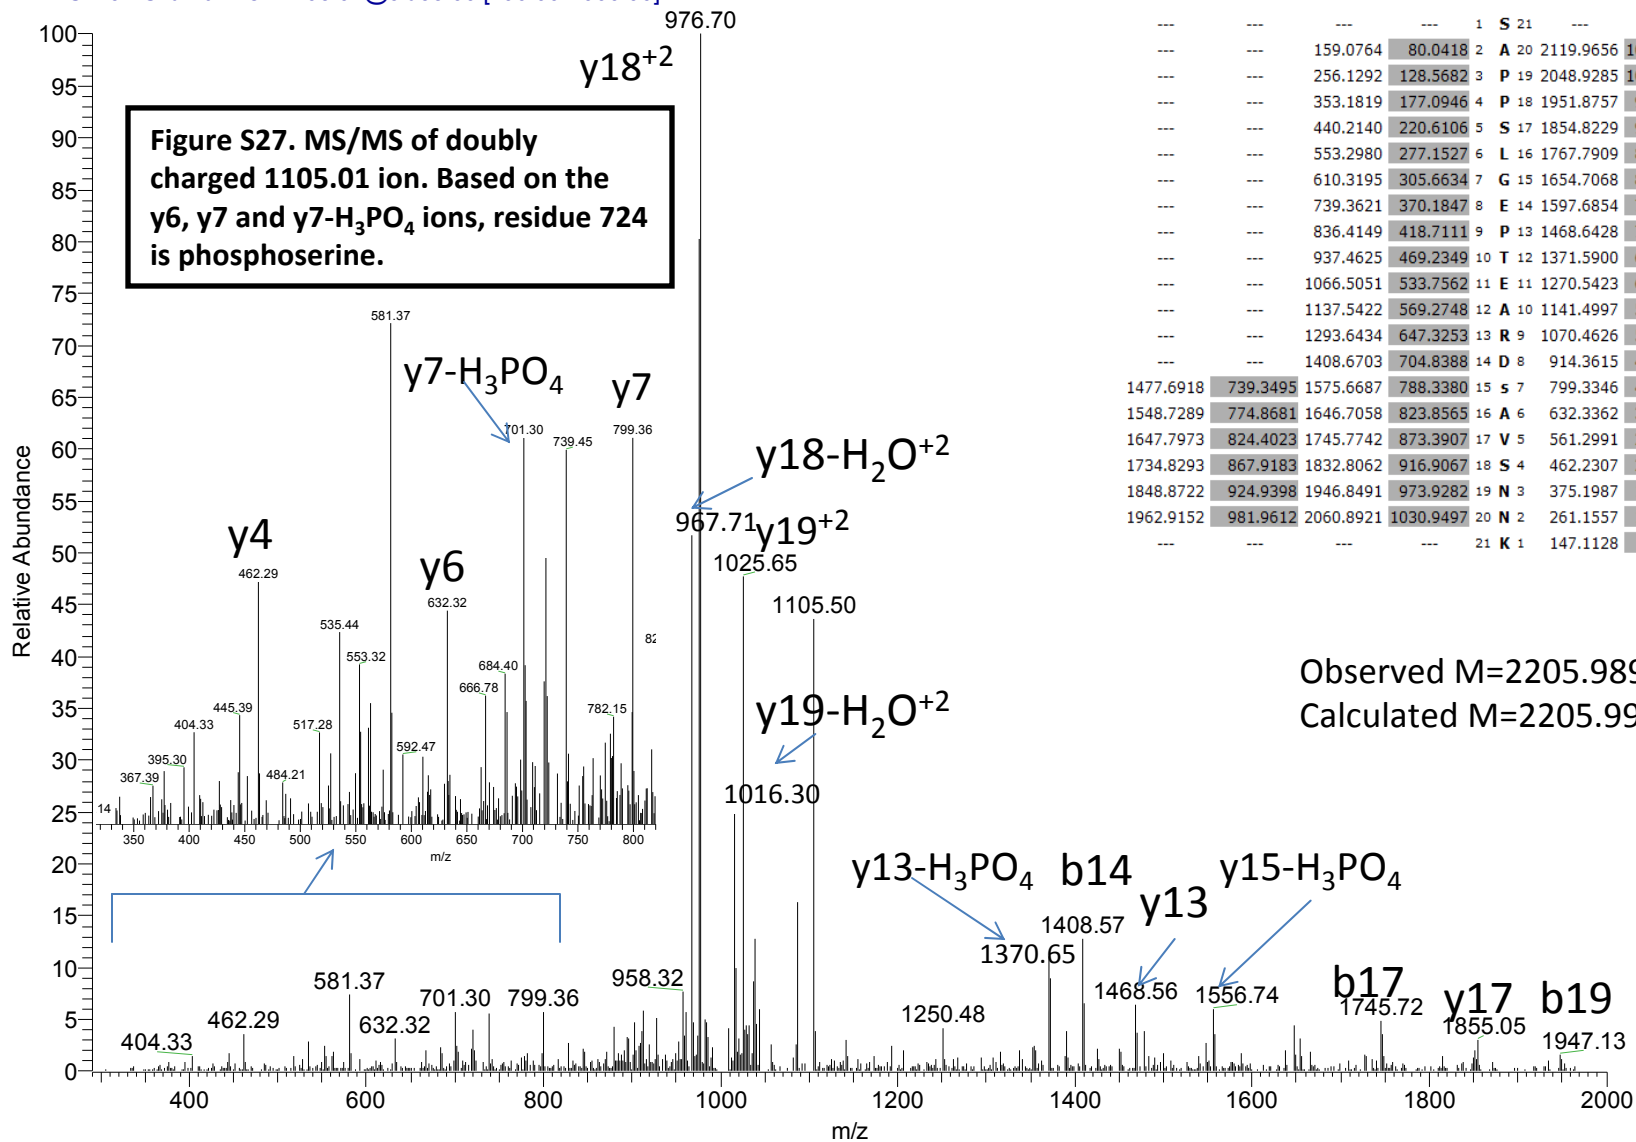

| b-H <sub>3</sub> PO <sub>4</sub> | b-H <sub>3</sub> PO <sub>4</sub> +2 | b         | b+2       | y       | y+2       | y-H <sub>3</sub> PO <sub>4</sub> | y-H <sub>3</sub> PO <sub>4</sub> +2 |
|----------------------------------|-------------------------------------|-----------|-----------|---------|-----------|----------------------------------|-------------------------------------|
| ---                              | ---                                 | ---       | ---       | 1 S 21  | ---       | ---                              | ---                                 |
| ---                              | ---                                 | 159.0764  | 80.0418   | 2 A 20  | 2119.9656 | 1060.4864                        | 2021.9887                           |
| ---                              | ---                                 | 256.1292  | 128.5682  | 3 P 19  | 2048.9285 | 1024.9679                        | 1950.9516                           |
| ---                              | ---                                 | 353.1819  | 177.0946  | 4 P 18  | 1951.8757 | 976.4415                         | 1853.8988                           |
| ---                              | ---                                 | 440.2140  | 220.6106  | 5 S 17  | 1854.8229 | 927.9151                         | 1756.8460                           |
| ---                              | ---                                 | 553.2980  | 277.1527  | 6 L 16  | 1767.7909 | 884.3991                         | 1669.8140                           |
| ---                              | ---                                 | 610.3195  | 305.6634  | 7 G 15  | 1654.7068 | 827.8571                         | 1556.7299                           |
| ---                              | ---                                 | 739.3621  | 370.1847  | 8 E 14  | 1597.6854 | 799.3463                         | 1499.7085                           |
| ---                              | ---                                 | 836.4149  | 418.7111  | 9 P 13  | 1468.6428 | 734.8250                         | 1370.6659                           |
| ---                              | ---                                 | 937.4625  | 469.2349  | 10 T 12 | 1371.5900 | 686.2986                         | 1273.6131                           |
| ---                              | ---                                 | 1066.5051 | 533.7562  | 11 E 11 | 1270.5423 | 635.7748                         | 1172.5654                           |
| ---                              | ---                                 | 1137.5422 | 569.2748  | 12 A 10 | 1141.4997 | 571.2535                         | 1043.5228                           |
| ---                              | ---                                 | 1293.6434 | 647.3253  | 13 R 9  | 1070.4626 | 535.7350                         | 972.4857                            |
| ---                              | ---                                 | 1408.6703 | 704.8388  | 14 D 8  | 914.3615  | 457.6844                         | 816.3846                            |
| 1477.6918                        | 739.3495                            | 1575.6687 | 788.3380  | 15 S 7  | 799.3346  | 400.1709                         | 701.3577                            |
| 1548.7289                        | 774.8681                            | 1646.7058 | 823.8565  | 16 A 6  | 632.3362  | 316.6717                         | ---                                 |
| 1647.7973                        | 824.4023                            | 1745.7742 | 873.3907  | 17 V 5  | 561.2991  | 281.1532                         | ---                                 |
| 1734.8293                        | 867.9183                            | 1832.8062 | 916.9067  | 18 S 4  | 462.2307  | 231.6190                         | ---                                 |
| 1848.8722                        | 924.9398                            | 1946.8491 | 973.9282  | 19 N 3  | 375.1987  | 188.1030                         | ---                                 |
| 1962.9152                        | 981.9612                            | 2060.8921 | 1030.9497 | 20 N 2  | 261.1557  | 131.0815                         | ---                                 |
| ---                              | ---                                 | ---       | ---       | 21 K 1  | 147.1128  | 74.0600                          | ---                                 |

Observed M=2205.9892  
 Calculated M=2205.9903

pEAK Rapid Cells

MS/MS of Peptide K.AEALLQAGH**p**YDADAIRECAEK.V

OT09-0081 #2883 RT: 30.49 AV: 1 NL: 2.70E5  
T: ITMS + c NSI d Full ms2 1177.52@cid35.00 [310.00-2000.00]

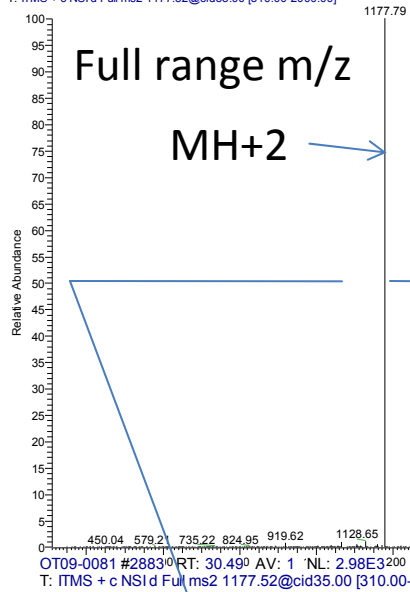

Figure S28. MS/MS of doubly charged 1177.52 ion. Intact mass is plus 80 amu from the parent mass, which suggests a single site of phosphorylation. Tyr963 is phosphorylated based on 1) the internal fragments and 2) it is the only possible phosphosite.

Observed M=2353.0296  
Calculated M=2353.0409

| b         | b+2       | y       | y+2                 |
|-----------|-----------|---------|---------------------|
| ---       | ---       | 1 A 21  | ---                 |
| 201.0870  | 101.0471  | 2 E 20  | 2283.0111 1142.0092 |
| 272.1241  | 136.5657  | 3 A 19  | 2153.9685 1077.4879 |
| 385.2082  | 193.1077  | 4 L 18  | 2082.9314 1041.9694 |
| 498.2922  | 249.6498  | 5 L 17  | 1969.8474 985.4273  |
| 626.3508  | 313.6790  | 6 Q 16  | 1856.7633 928.8853  |
| 697.3879  | 349.1976  | 7 A 15  | 1728.7047 864.8560  |
| 754.4094  | 377.7083  | 8 G 14  | 1657.6676 829.3374  |
| 891.4683  | 446.2378  | 9 H 13  | 1600.6461 800.8267  |
| 1134.4980 | 567.7526  | 10 Y 12 | 1463.5872 732.2973  |
| 1249.5249 | 625.2661  | 11 D 11 | 1220.5576 610.7824  |
| 1320.5620 | 660.7846  | 12 A 10 | 1105.5306 553.2690  |
| 1435.5890 | 718.2981  | 13 D 9  | 1034.4935 517.7504  |
| 1506.6261 | 753.8167  | 14 A 8  | 919.4666 460.2369   |
| 1619.7101 | 810.3587  | 15 I 7  | 848.4295 424.7184   |
| 1775.8112 | 888.4093  | 16 R 6  | 735.3454 368.1763   |
| 1904.8538 | 952.9306  | 17 E 5  | 579.2443 290.1258   |
| 2007.8630 | 1004.4351 | 18 C 4  | 450.2017 225.6045   |
| 2078.9001 | 1039.9537 | 19 A 3  | 347.1925 174.0999   |
| 2207.9427 | 1104.4750 | 20 E 2  | 276.1554 138.5813   |
| ---       | ---       | 21 K 1  | 147.1128 74.0600    |

LLQAGHyDAD-2H<sub>2</sub>O

expanded range m/z

yDADAIREC-2H<sub>2</sub>O-NH<sub>3</sub>

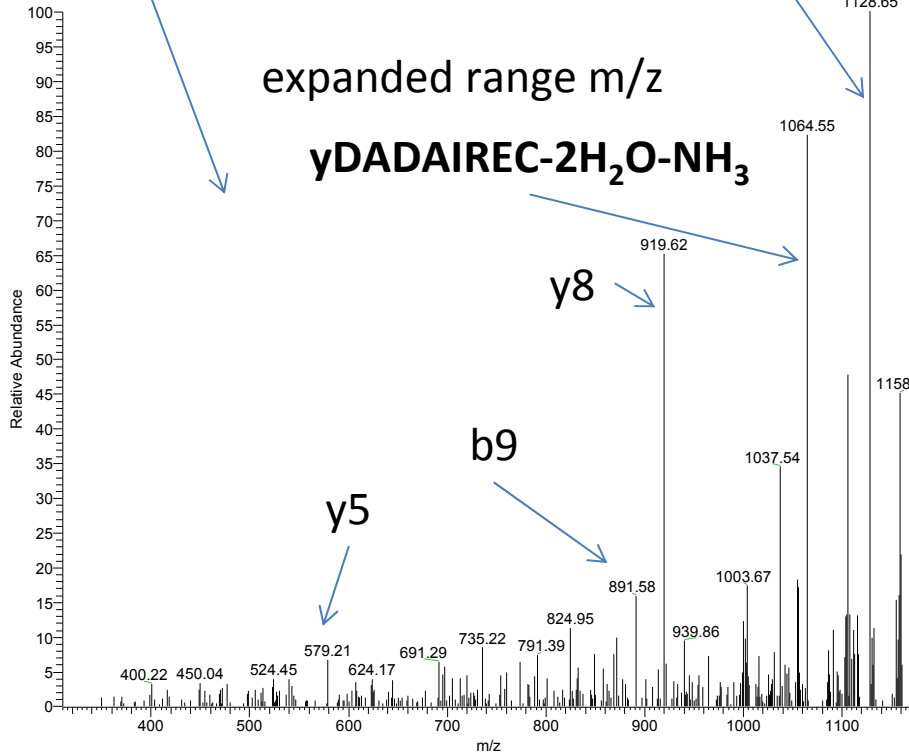

expanded range m/z

LQAGHyDADAIR-2H<sub>2</sub>O

ALLQAGHyDADAI-2H<sub>2</sub>O

ALLQAGHyDADAIR-2H<sub>2</sub>O

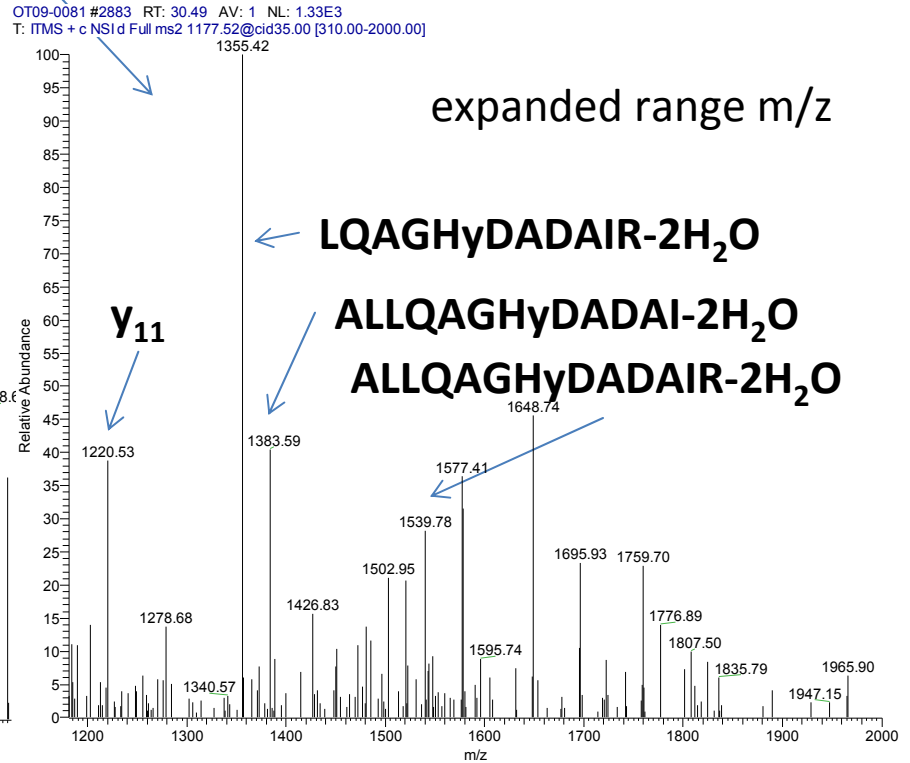

OT09-0060 #3122 RT: 41.21 AV: 1 NL: 8.40E1  
 T: ITMS + c NSI d Full ms2 728.88@cid35.00 [190.00-1470.00]

pEAK Rapid Cells

MS/MS of Peptide K.LLIQLADpSFVEK.G

Figure S29. MS/MS on the doubly charged 728.88 ion shows residue 1188 is phosphoserine based on the y4 and y6 ions.

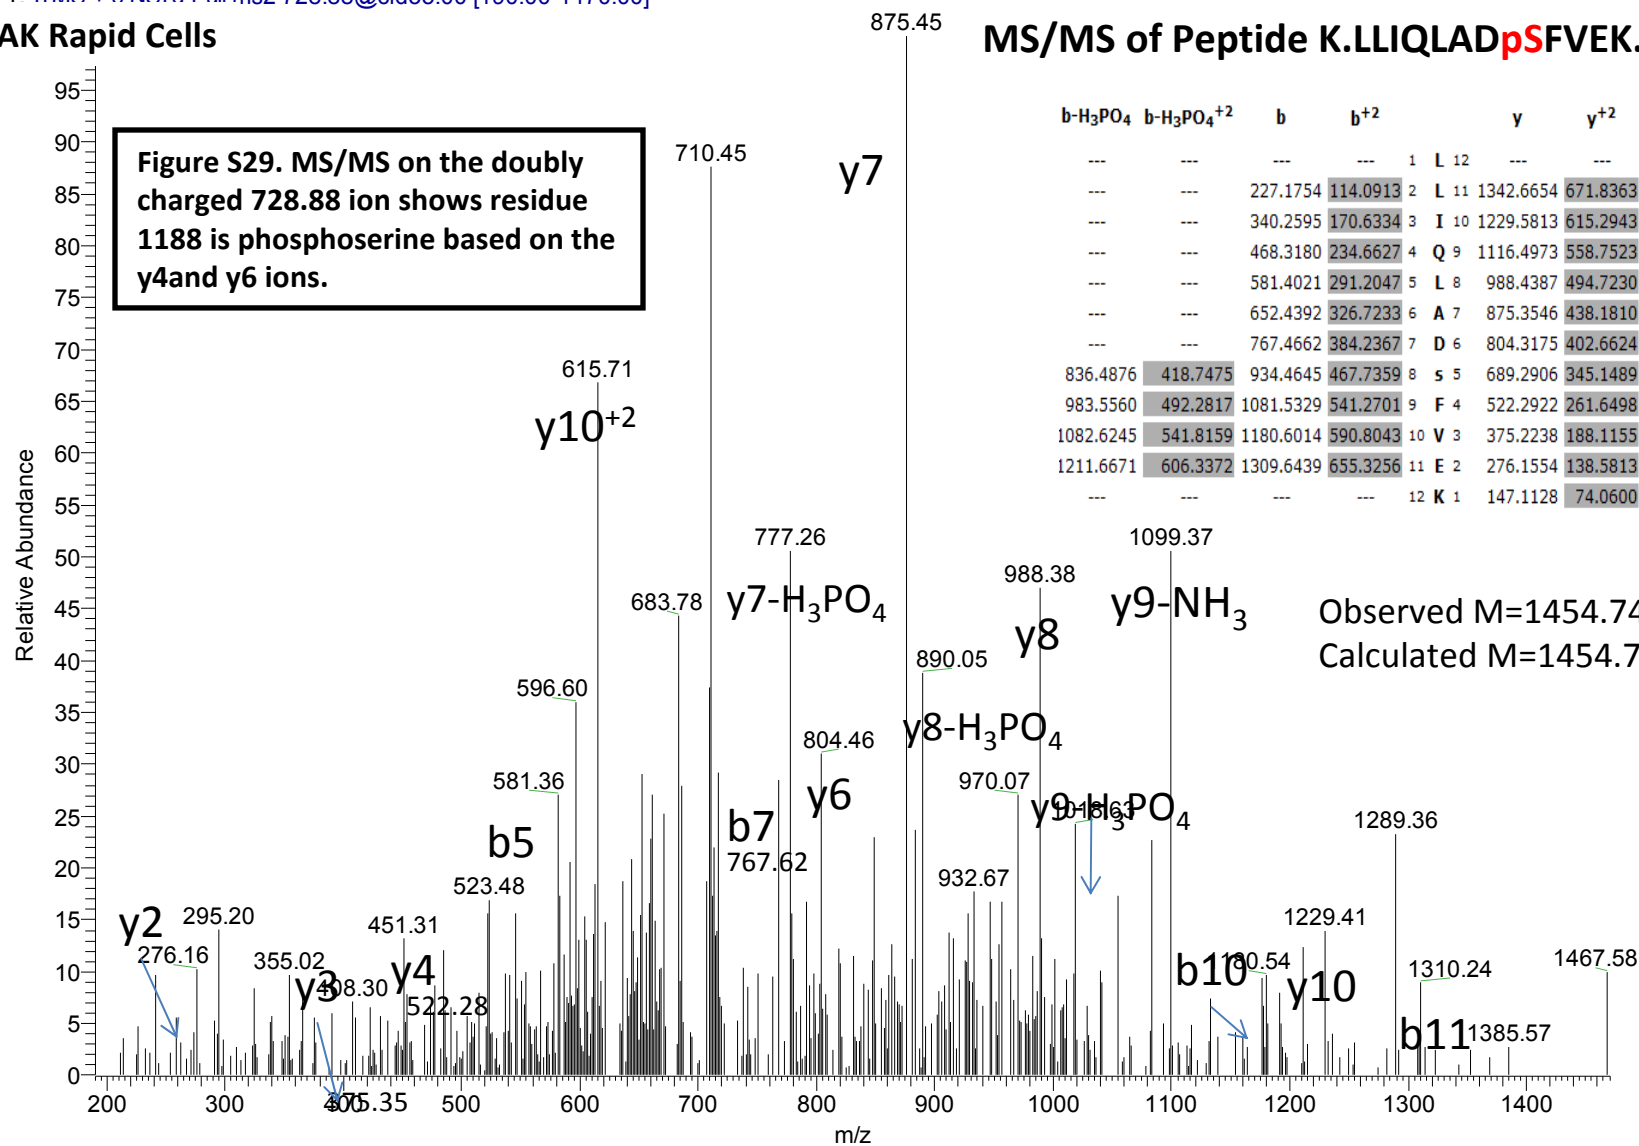

Observed M=1454.7472  
 Calculated M=1454.7422

pEAK Rapid Cells 4 AV: 1 NL: 9.24E2  
19.40@cid35.00 [215.00-1650.00]

### MS/MS of Peptide K.DLELDIIPASLpSDR.E

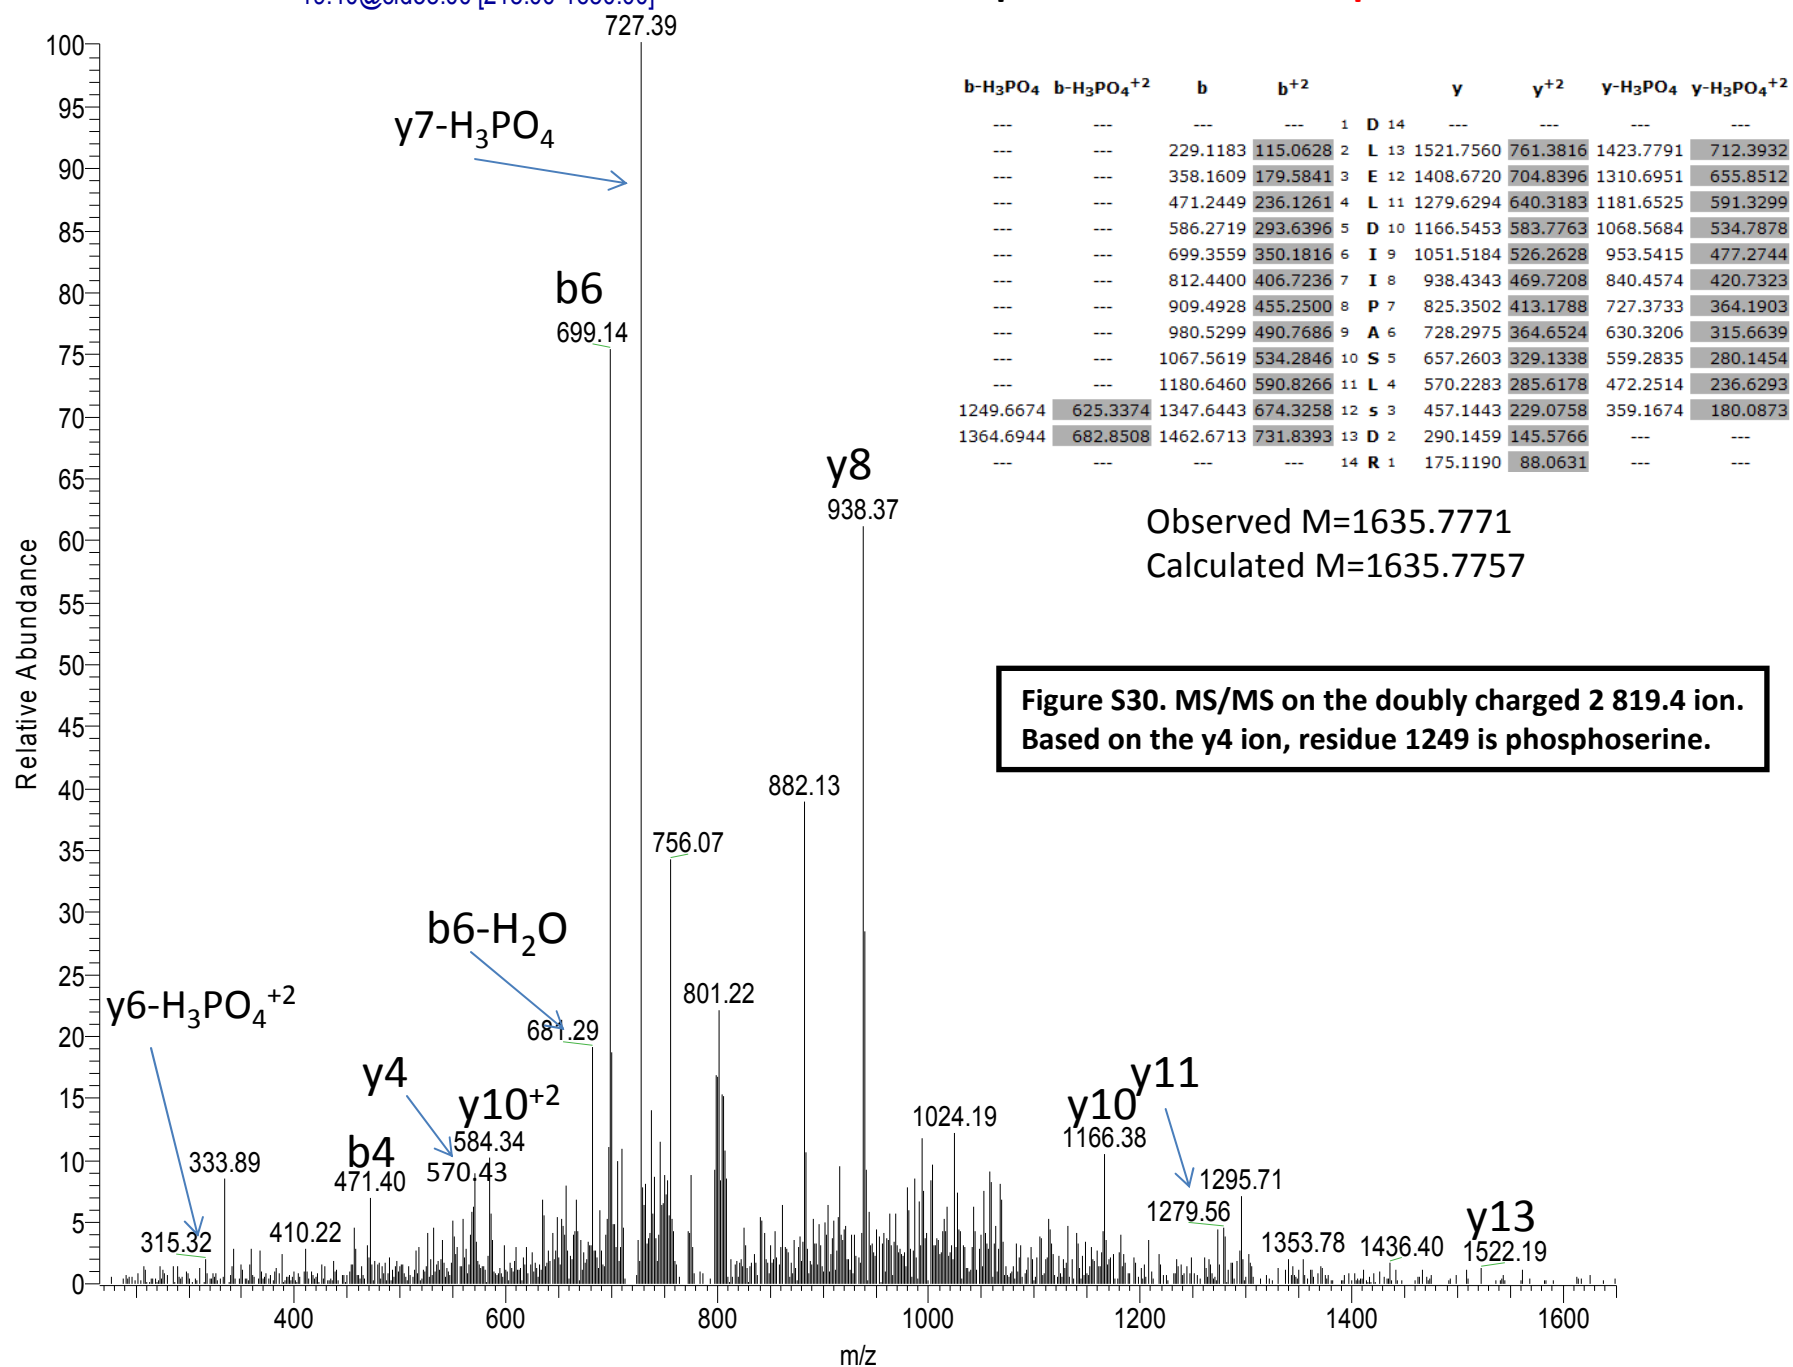

**Figure S30. MS/MS on the doubly charged 2 819.4 ion. Based on the y4 ion, residue 1249 is phosphoserine.**

pEAK Rapid Cells

OT09-0088 #2287 RT: 28.48 AV: 1 NL: 2.61E3  
 T: ITMS + c NSI d Full ms2 836.97@cid35.00 [220.00-1685.00]

MS/MS of Peptide K.GALKEIPIQLPK<sup>p</sup>TPAK.L

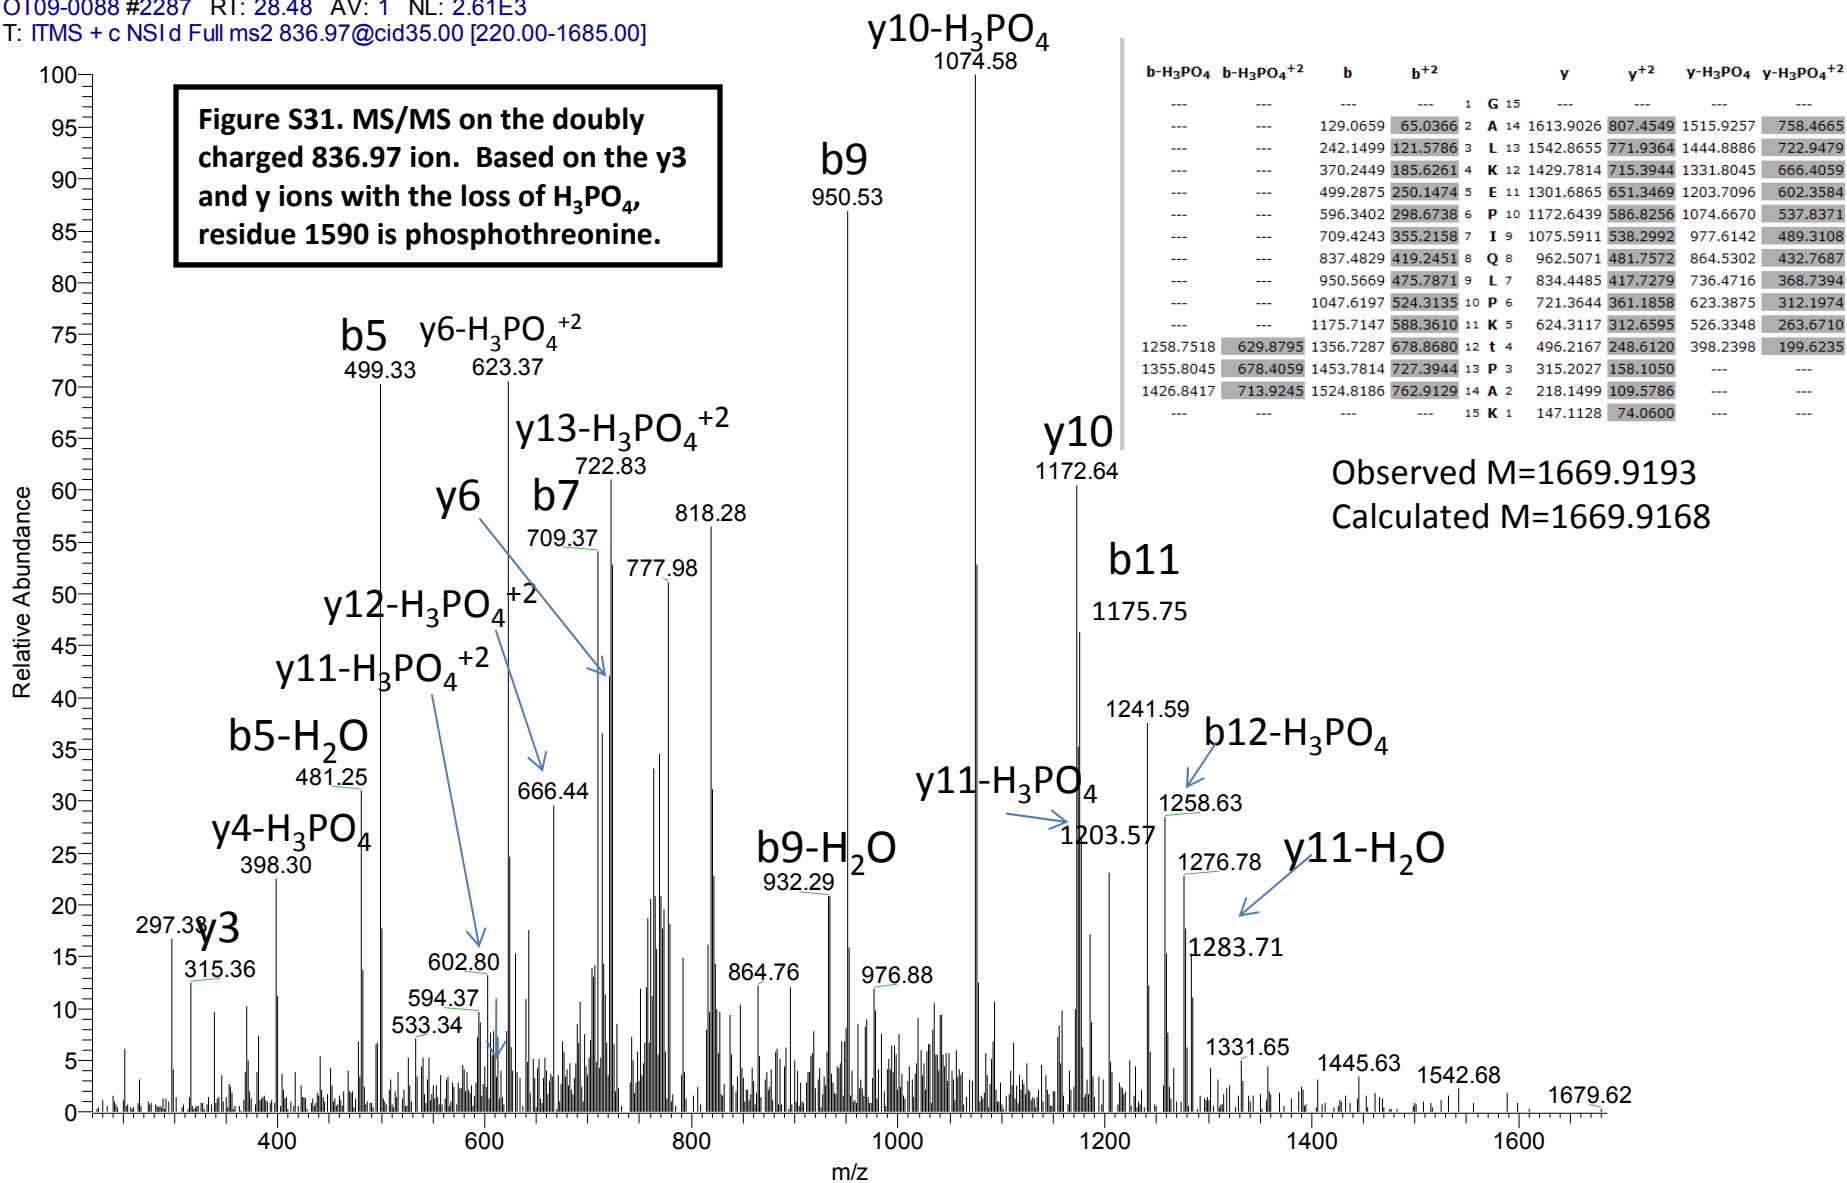



pEAK Rapid Cells

OT09-0060 #1896 RT: 25.69 AV: 1 NL: 3.66E3  
 T: ITMS + c NSI d Full ms2 1025.11@cid35.00 [270.00-2000.00]

MS/MS of Peptide R.NNpSKRDGVEDGDSQGDGSSQPDTISIAsR.T

| b-H <sub>3</sub> PO <sub>4</sub> | b-H <sub>3</sub> PO <sub>4</sub> <sup>+2</sup> | b         | b <sup>+2</sup> | y  | y <sup>+2</sup> | y-H <sub>3</sub> PO <sub>4</sub> | y-H <sub>3</sub> PO <sub>4</sub> <sup>+2</sup> |
|----------------------------------|------------------------------------------------|-----------|-----------------|----|-----------------|----------------------------------|------------------------------------------------|
| ---                              | ---                                            | ---       | ---             | 1  | N 29            | ---                              | ---                                            |
| ---                              | ---                                            | 229.0931  | 115.0502        | 2  | N 28            | 2958.2709                        | 1479.6391                                      |
| 298.1146                         | 149.5609                                       | 396.0915  | 198.5494        | 3  | S 27            | 2844.2279                        | 1422.6176                                      |
| 426.2096                         | 213.6084                                       | 524.1865  | 262.5969        | 4  | K 26            | 2677.2296                        | 1339.1184                                      |
| 582.3107                         | 291.6590                                       | 680.2876  | 340.6474        | 5  | R 25            | 2549.1346                        | 1275.0709                                      |
| 697.3376                         | 349.1724                                       | 795.3145  | 398.1609        | 6  | D 24            | 2393.0335                        | 1197.0204                                      |
| 754.3591                         | 377.6832                                       | 852.3360  | 426.6716        | 7  | G 23            | 2278.0066                        | 1139.5069                                      |
| 853.4275                         | 427.2174                                       | 951.4044  | 476.2058        | 8  | V 22            | 2220.9851                        | 1110.9962                                      |
| 982.4701                         | 491.7387                                       | 1080.4470 | 540.7271        | 9  | E 21            | 2121.9167                        | 1061.4620                                      |
| 1097.4970                        | 549.2522                                       | 1195.4739 | 598.2406        | 10 | D 20            | 1992.8741                        | 996.9407                                       |
| 1154.5185                        | 577.7629                                       | 1252.4954 | 626.7513        | 11 | G 19            | 1877.8472                        | 939.4272                                       |
| 1269.5454                        | 635.2764                                       | 1367.5223 | 684.2648        | 12 | D 18            | 1820.8257                        | 910.9165                                       |
| 1356.5775                        | 678.7924                                       | 1454.5544 | 727.7808        | 13 | S 17            | 1705.7987                        | 853.4030                                       |
| 1484.6360                        | 742.8217                                       | 1582.6129 | 791.8101        | 14 | Q 16            | 1618.7667                        | 809.8870                                       |
| 1541.6575                        | 771.3324                                       | 1639.6344 | 820.3208        | 15 | G 15            | 1490.7081                        | 745.8577                                       |
| 1656.6844                        | 828.8459                                       | 1754.6613 | 877.8343        | 16 | D 14            | 1433.6867                        | 717.3470                                       |
| 1713.7059                        | 857.3566                                       | 1811.6828 | 906.3450        | 17 | G 13            | 1318.6597                        | 659.8335                                       |
| 1800.7379                        | 900.8726                                       | 1898.7148 | 949.8611        | 18 | S 12            | 1261.6383                        | 631.3228                                       |
| 1887.7700                        | 944.3886                                       | 1985.7469 | 993.3771        | 19 | S 11            | 1174.6062                        | 587.8068                                       |
| 2015.8285                        | 1008.4179                                      | 2113.8054 | 1057.4064       | 20 | Q 10            | 1087.5742                        | 544.2907                                       |
| 2112.8813                        | 1056.9443                                      | 2210.8582 | 1105.9327       | 21 | P 9             | 959.5156                         | 480.2615                                       |
| 2227.9083                        | 1114.4578                                      | 2325.8851 | 1163.4462       | 22 | D 8             | 862.4629                         | 431.7351                                       |
| 2328.9559                        | 1164.9816                                      | 2426.9328 | 1213.9701       | 23 | T 7             | 747.4359                         | 374.2216                                       |
| 2442.0400                        | 1221.5236                                      | 2540.0169 | 1270.5121       | 24 | I 6             | 646.3883                         | 323.6978                                       |
| 2529.0720                        | 1265.0396                                      | 2627.0489 | 1314.0281       | 25 | S 5             | 533.3042                         | 267.1557                                       |
| 2642.1561                        | 1321.5817                                      | 2740.1330 | 1370.5701       | 26 | I 4             | 446.2722                         | 223.6397                                       |
| 2713.1932                        | 1357.1002                                      | 2811.1701 | 1406.0887       | 27 | A 3             | 333.1881                         | 167.0977                                       |
| 2800.2252                        | 1400.6163                                      | 2898.2021 | 1449.6047       | 28 | S 2             | 262.1510                         | 131.5791                                       |
| ---                              | ---                                            | ---       | ---             | 29 | R 1             | 175.1190                         | 88.0631                                        |

Observed M=3071.3071  
 Calculated M=3071.3065

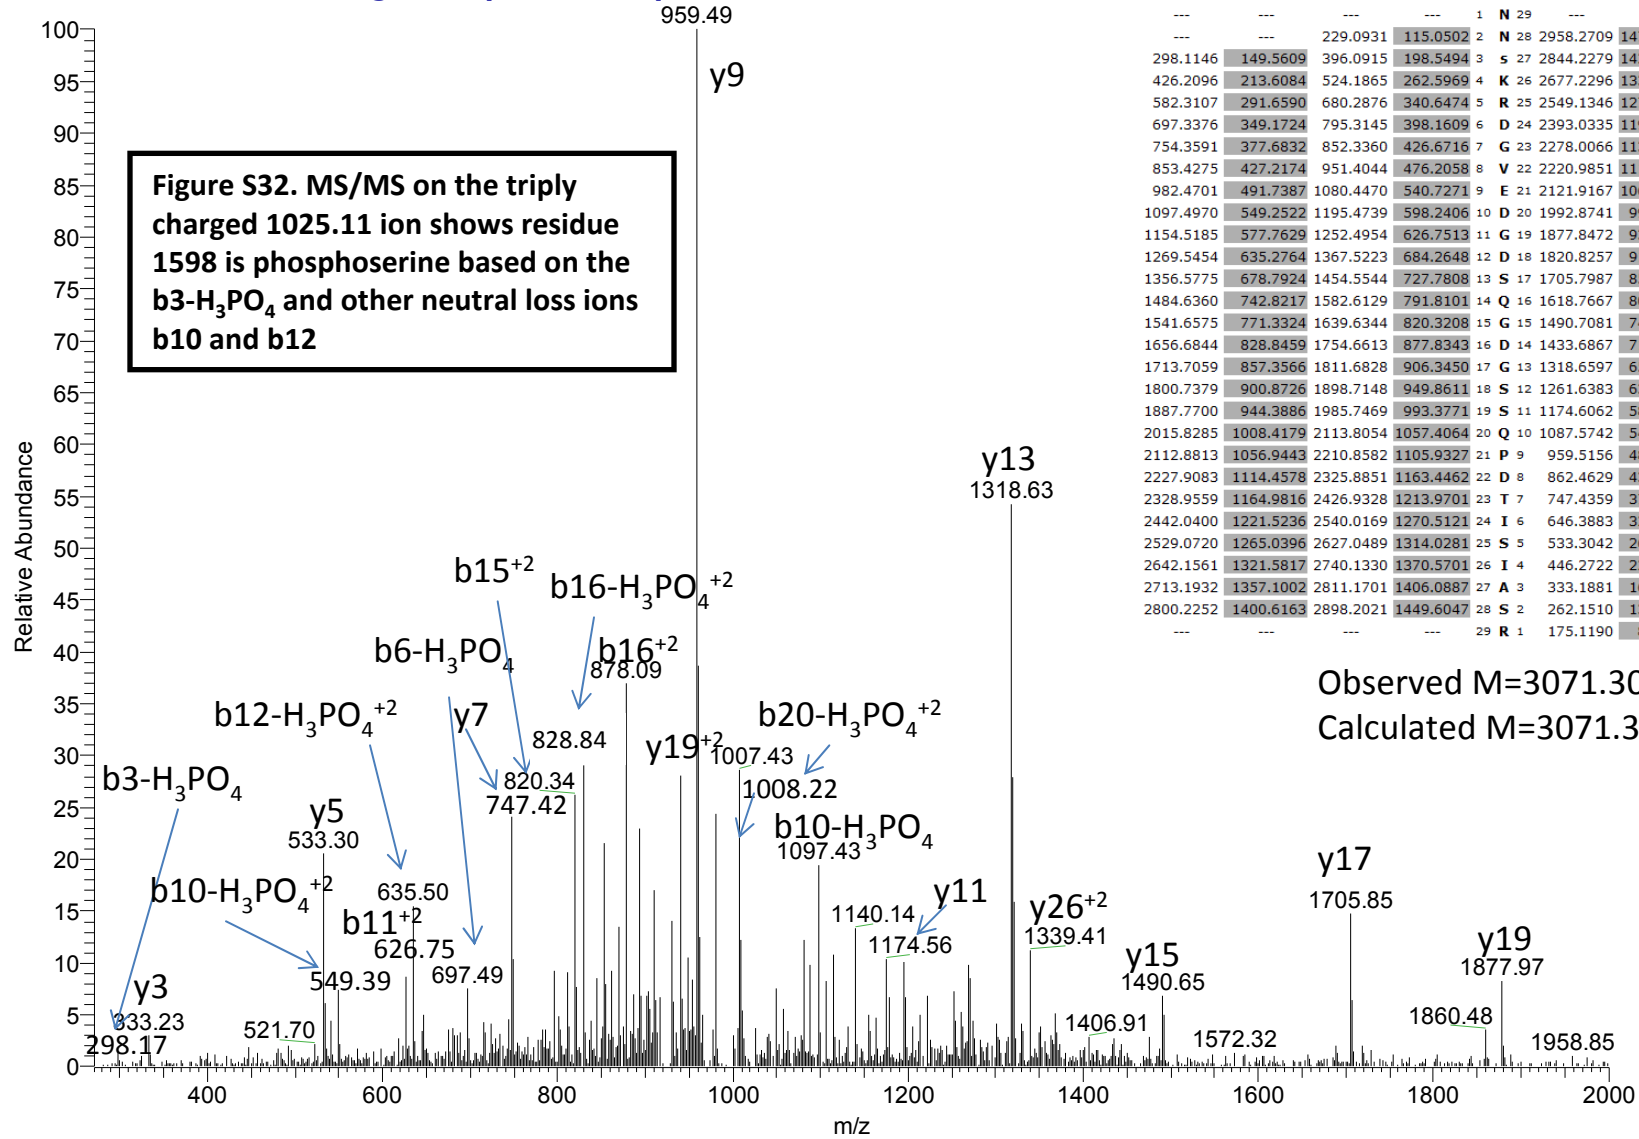



# pEAK Rapid Cells

OT09-0072 #2027 RT: 27.41 AV: 1 NL: 6.16E3  
 T: ITMS + c NSI d Full ms2 878.04@cid35.00 [230.00-2000.00]

# MS/MS of Peptide K.RDGVEDGDpSQGDGSSQPDTISIASR.T

| b-H <sub>3</sub> PO <sub>4</sub> | b-H <sub>3</sub> PO <sub>4</sub> <sup>+2</sup> | b         | b <sup>+2</sup> | y  | y <sup>+2</sup> | y-H <sub>3</sub> PO <sub>4</sub> | y-H <sub>3</sub> PO <sub>4</sub> <sup>+2</sup> |           |           |
|----------------------------------|------------------------------------------------|-----------|-----------------|----|-----------------|----------------------------------|------------------------------------------------|-----------|-----------|
| ---                              | ---                                            | ---       | ---             | 1  | R 25            | ---                              | ---                                            |           |           |
| ---                              | ---                                            | 272.1353  | 136.5713        | 2  | D 24            | 2472.9998                        | 1237.0036                                      | 2375.0229 | 1188.0151 |
| ---                              | ---                                            | 329.1568  | 165.0820        | 3  | G 23            | 2357.9729                        | 1179.4901                                      | 2259.9960 | 1130.5016 |
| ---                              | ---                                            | 428.2252  | 214.6162        | 4  | V 22            | 2300.9514                        | 1150.9794                                      | 2202.9745 | 1101.9909 |
| ---                              | ---                                            | 557.2678  | 279.1375        | 5  | E 21            | 2201.8830                        | 1101.4451                                      | 2103.9061 | 1052.4567 |
| ---                              | ---                                            | 672.2947  | 336.6510        | 6  | D 20            | 2072.8404                        | 1036.9239                                      | 1974.8635 | 987.9354  |
| ---                              | ---                                            | 729.3162  | 365.1617        | 7  | G 19            | 1957.8135                        | 979.4104                                       | 1859.8366 | 930.4219  |
| ---                              | ---                                            | 844.3432  | 422.6752        | 8  | D 18            | 1900.7920                        | 950.8996                                       | 1802.8151 | 901.9112  |
| 913.3646                         | 457.1859                                       | 1011.3415 | 506.1744        | 9  | S 17            | 1785.7651                        | 893.3862                                       | 1687.7882 | 844.3977  |
| 1041.4232                        | 521.2152                                       | 1139.4001 | 570.2037        | 10 | Q 16            | 1618.7667                        | 809.8870                                       | ---       | ---       |
| 1098.4447                        | 549.7260                                       | 1196.4216 | 598.7144        | 11 | G 15            | 1490.7081                        | 745.8577                                       | ---       | ---       |
| 1213.4716                        | 607.2394                                       | 1311.4485 | 656.2279        | 12 | D 14            | 1433.6867                        | 717.3470                                       | ---       | ---       |
| 1270.4931                        | 635.7502                                       | 1368.4700 | 684.7386        | 13 | G 13            | 1318.6597                        | 659.8335                                       | ---       | ---       |
| 1357.5251                        | 679.2662                                       | 1455.5020 | 728.2546        | 14 | S 12            | 1261.6383                        | 631.3228                                       | ---       | ---       |
| 1444.5571                        | 722.7822                                       | 1542.5340 | 771.7706        | 15 | S 11            | 1174.6062                        | 587.8068                                       | ---       | ---       |
| 1572.6157                        | 786.8115                                       | 1670.5926 | 835.7999        | 16 | Q 10            | 1087.5742                        | 544.2907                                       | ---       | ---       |
| 1669.6685                        | 835.3379                                       | 1767.6454 | 884.3263        | 17 | P 9             | 959.5156                         | 480.2615                                       | ---       | ---       |
| 1784.6954                        | 892.8513                                       | 1882.6723 | 941.8398        | 18 | D 8             | 862.4629                         | 431.7351                                       | ---       | ---       |
| 1885.7431                        | 943.3752                                       | 1983.7200 | 992.3636        | 19 | T 7             | 747.4359                         | 374.2216                                       | ---       | ---       |
| 1998.8271                        | 999.9172                                       | 2096.8040 | 1048.9057       | 20 | I 6             | 646.3883                         | 323.6978                                       | ---       | ---       |
| 2085.8592                        | 1043.4332                                      | 2183.8361 | 1092.4217       | 21 | S 5             | 533.3042                         | 267.1557                                       | ---       | ---       |
| 2198.9432                        | 1099.9753                                      | 2296.9201 | 1148.9637       | 22 | I 4             | 446.2722                         | 223.6397                                       | ---       | ---       |
| 2269.9804                        | 1135.4938                                      | 2367.9572 | 1184.4823       | 23 | A 3             | 333.1881                         | 167.0977                                       | ---       | ---       |
| 2357.0124                        | 1179.0098                                      | 2454.9893 | 1227.9983       | 24 | S 2             | 262.1510                         | 131.5791                                       | ---       | ---       |
| ---                              | ---                                            | ---       | ---             | 25 | R 1             | 175.1190                         | 88.0631                                        | ---       | ---       |

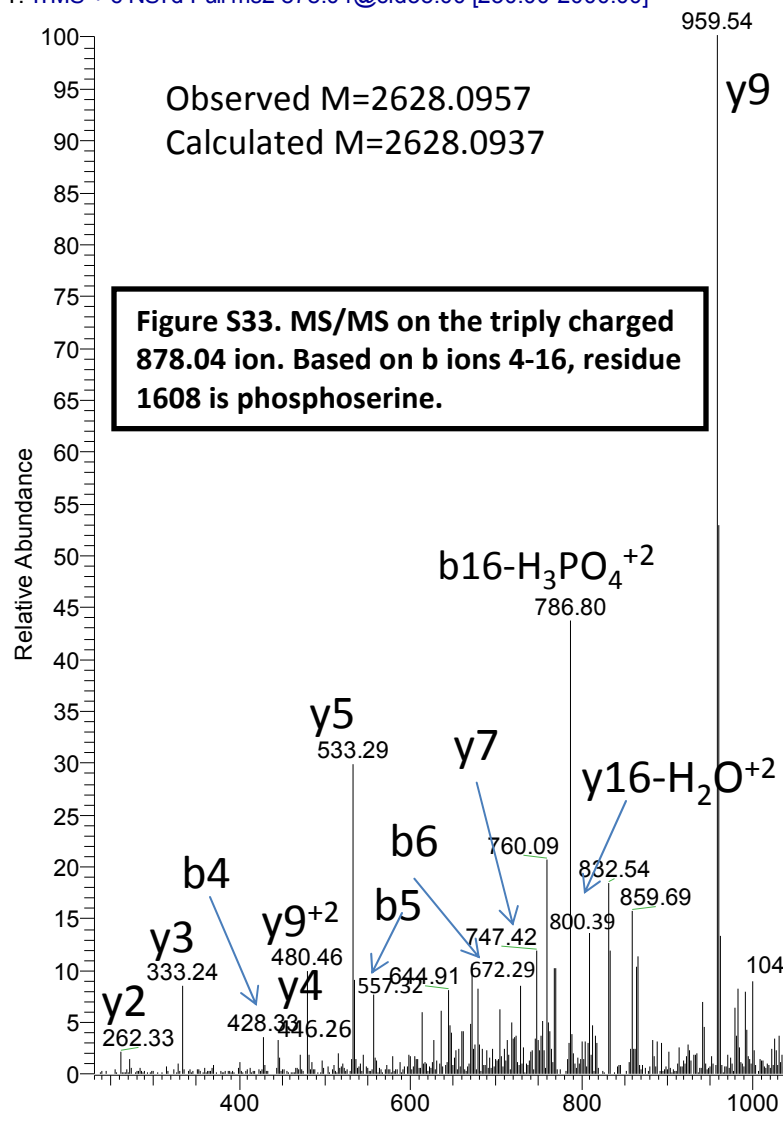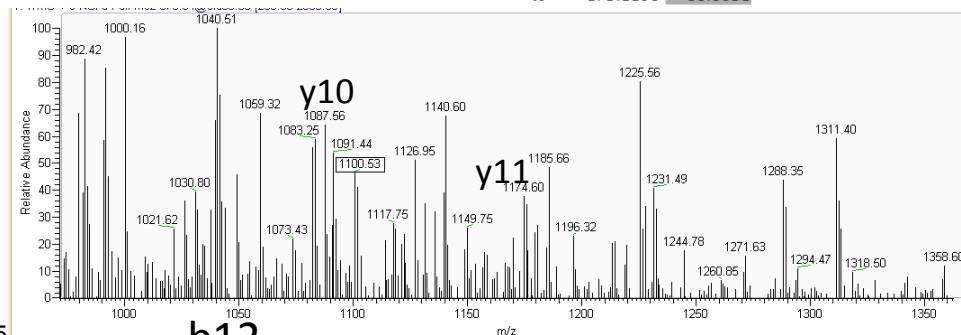

# pPEAK Rapid Cells

OT09-0080 #2186 RT: 27.35 AV: 1 NL: 5.54E3  
 T: ITMS + c NSI d Full ms2 878.04@cid35.00 [230.00-2000.00]

## MS/MS of Peptide K.RDGVEDGDSQGDGpSSQPDTISIASR.T

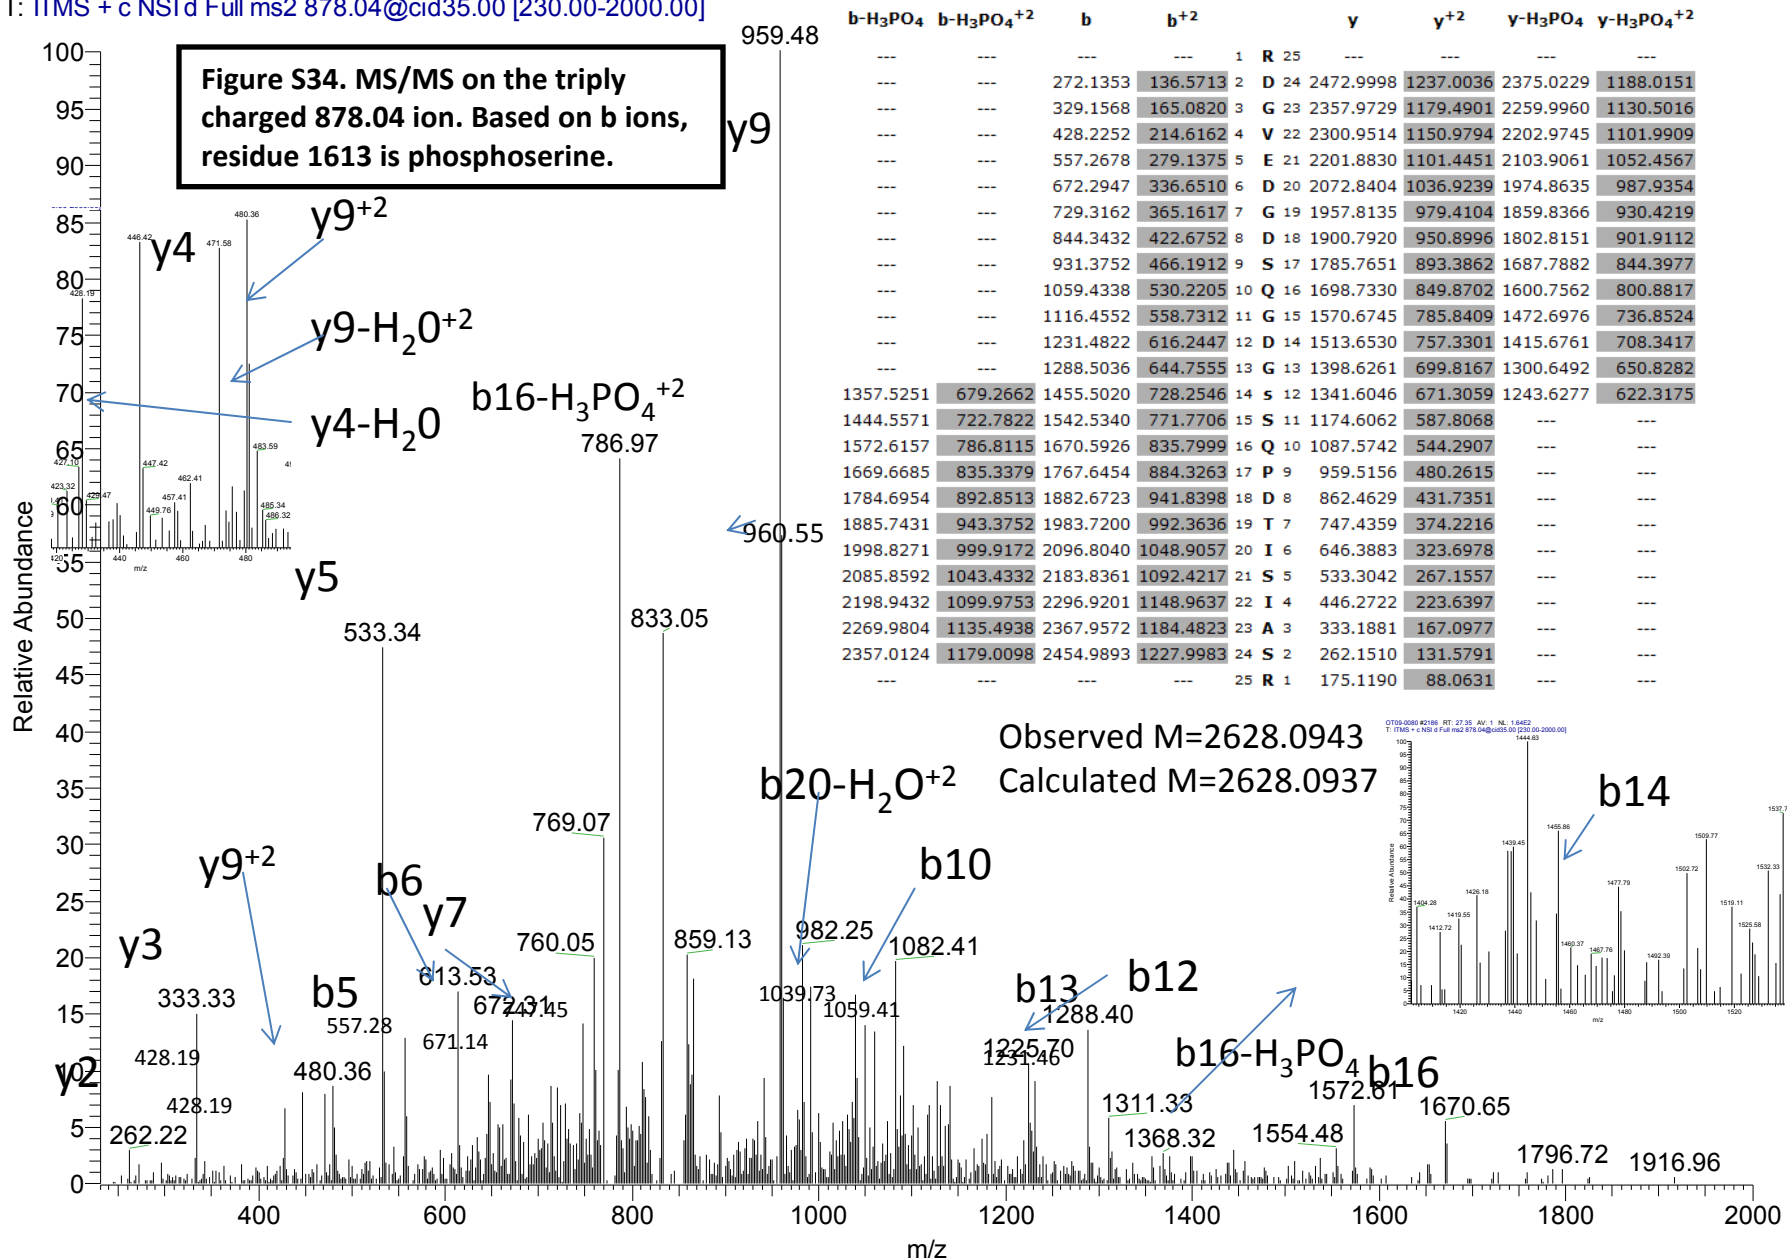

OT09-0088 #2355 RT: 29.10 AV: 1 NL: 4.52E3  
 T: ITMS + c NSI d Full ms2 826.01@cid35.00 [215.00-2000.00]

### MS/MS of Peptide R.DGVEDGDSQGDGSpSQPDTISIASR.T

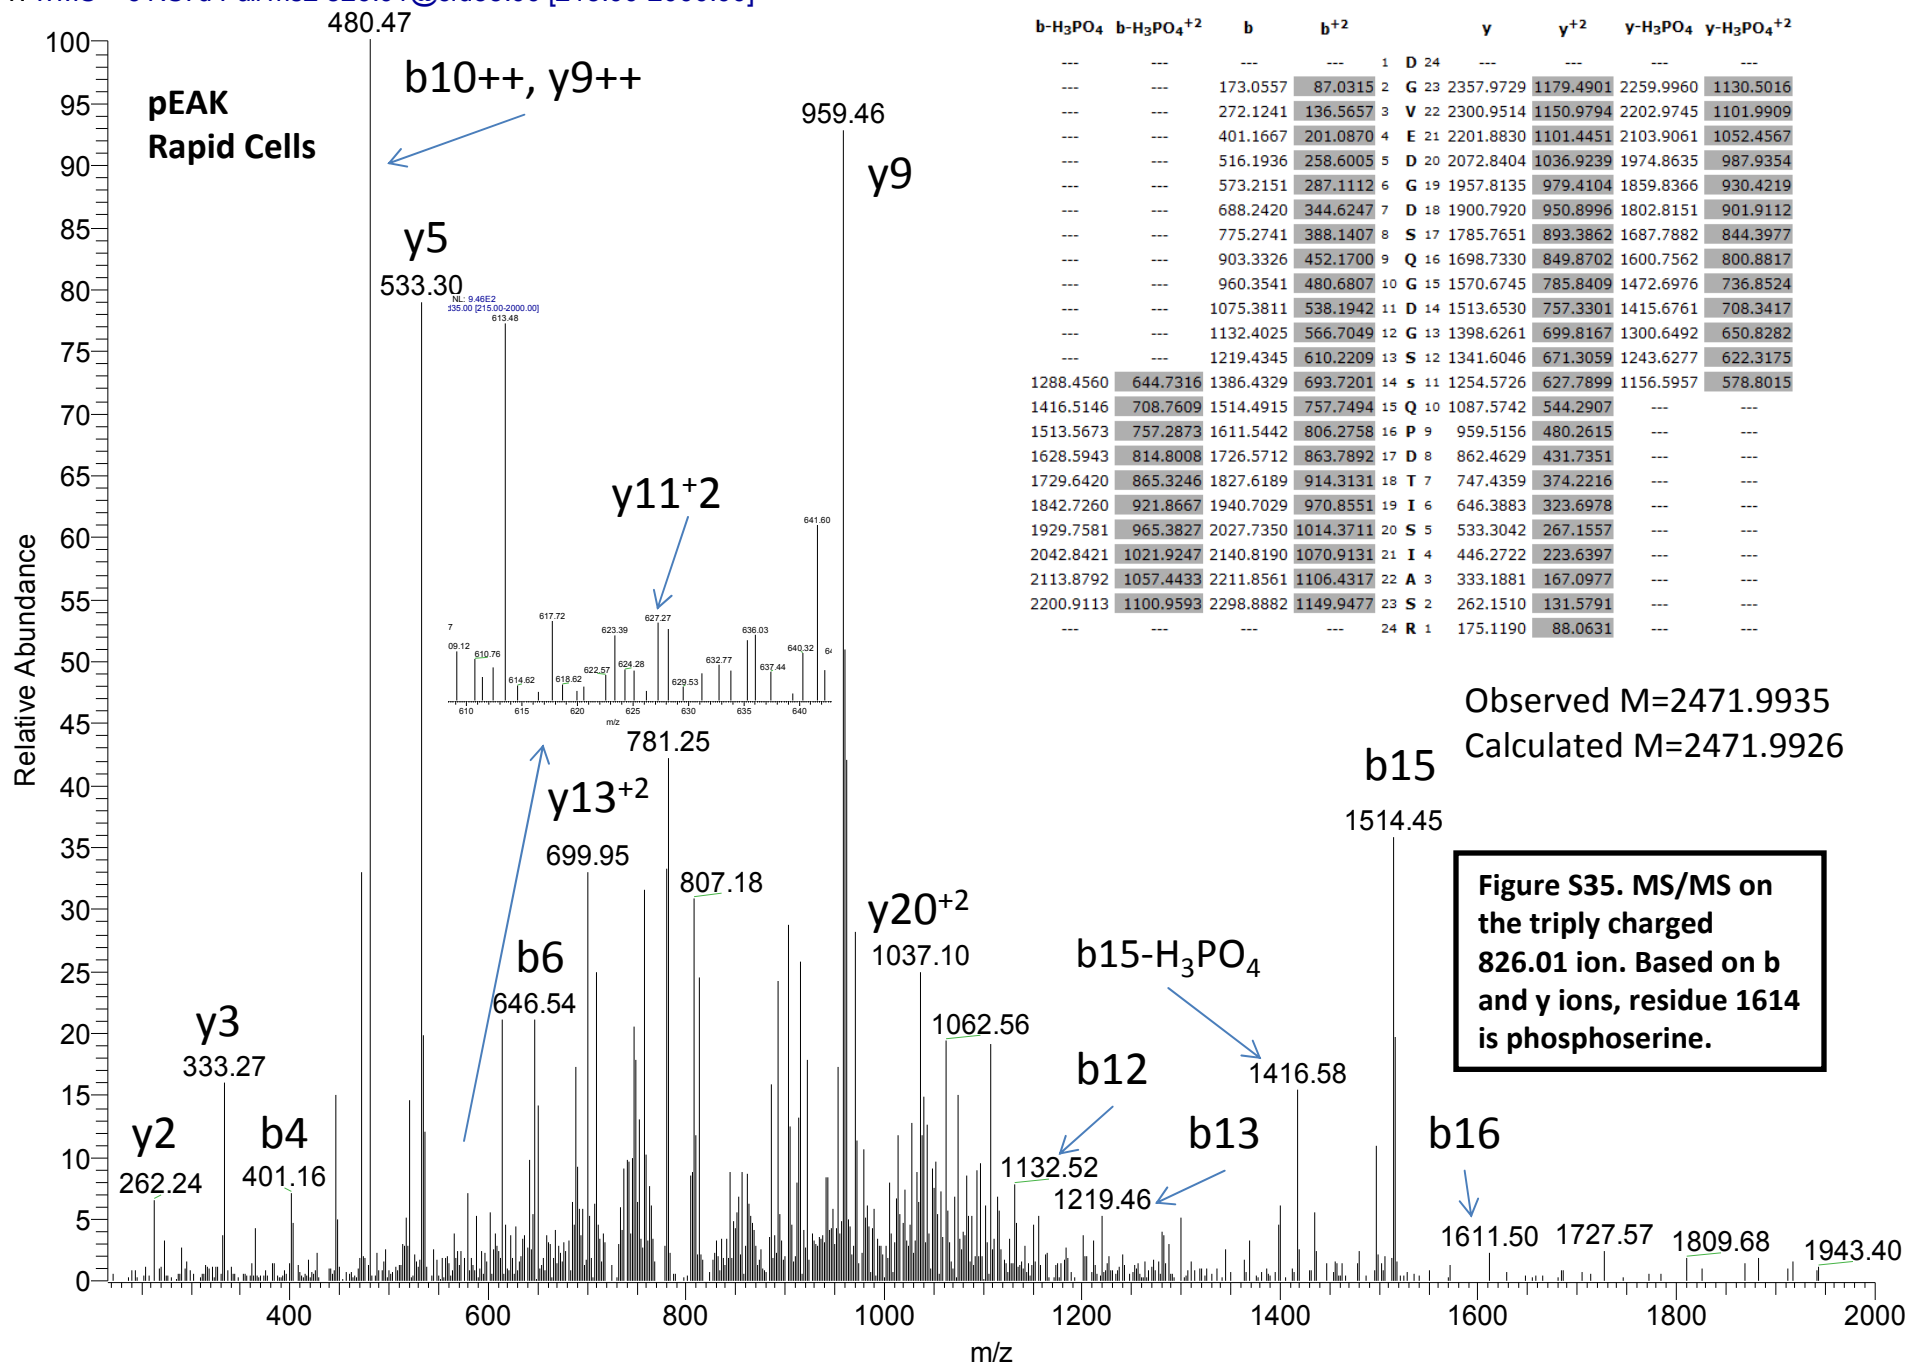

Figure S35. MS/MS on the triply charged 826.01 ion. Based on b and y ions, residue 1614 is phosphoserine.

pEAK Rapid Cells

OT09-0068 #2096 RT: 28.19 AV: 1 NL: 7.79E2  
 T: ITMS + c NSI d Full ms2 825.35@cid35.00 [215.00-2000.00]

MS/MS of Peptide R.DGVEDGDSQGDSQPDP**T**ISIASR.T

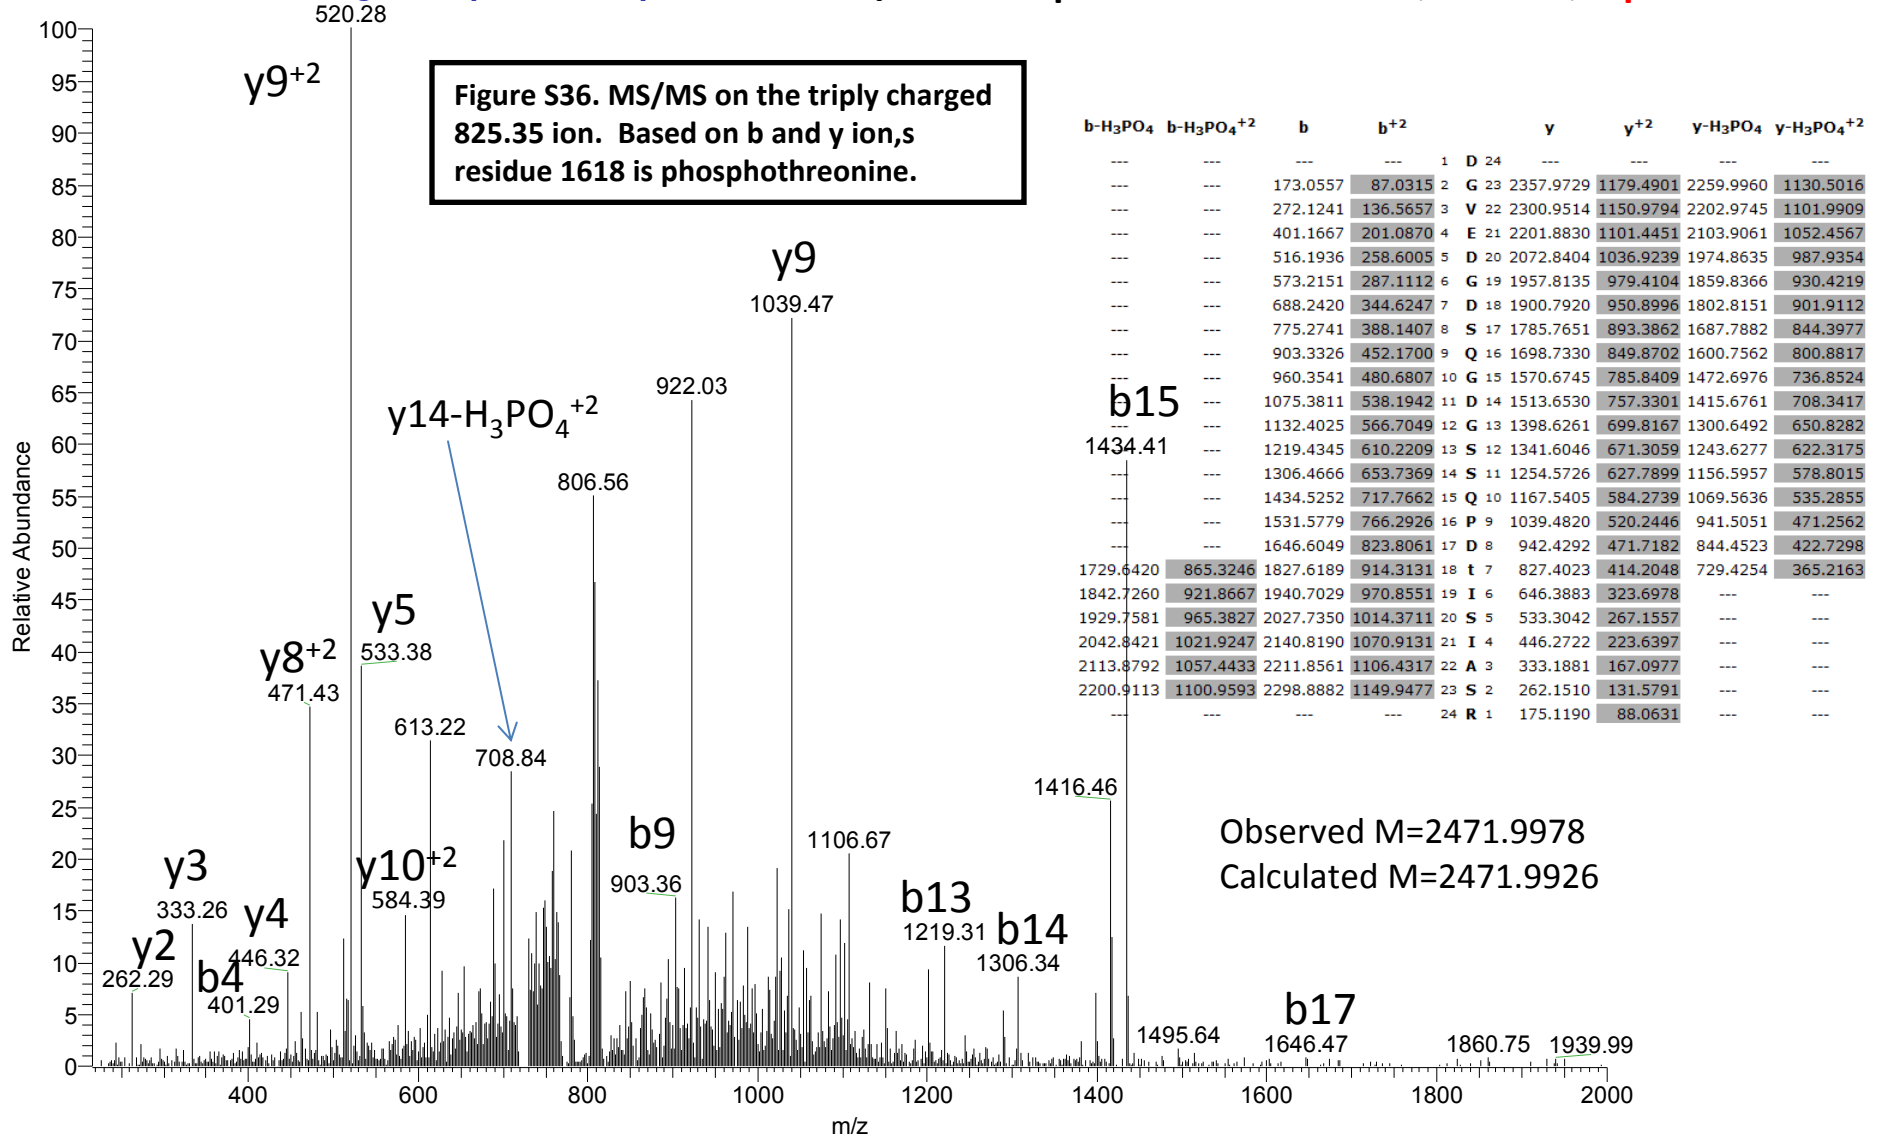

pEAK Rapid Cells

OT09-0060 #2098 RT: 28.21 AV: 1 NL: 8.61E2  
 T: ITMS + c NSI d Full ms2 825.34@cid35.00 [215.00-2000.00]

MS/MS of Peptide R.DGVEDGDSQGDSQPDTI**p**SIASR.T

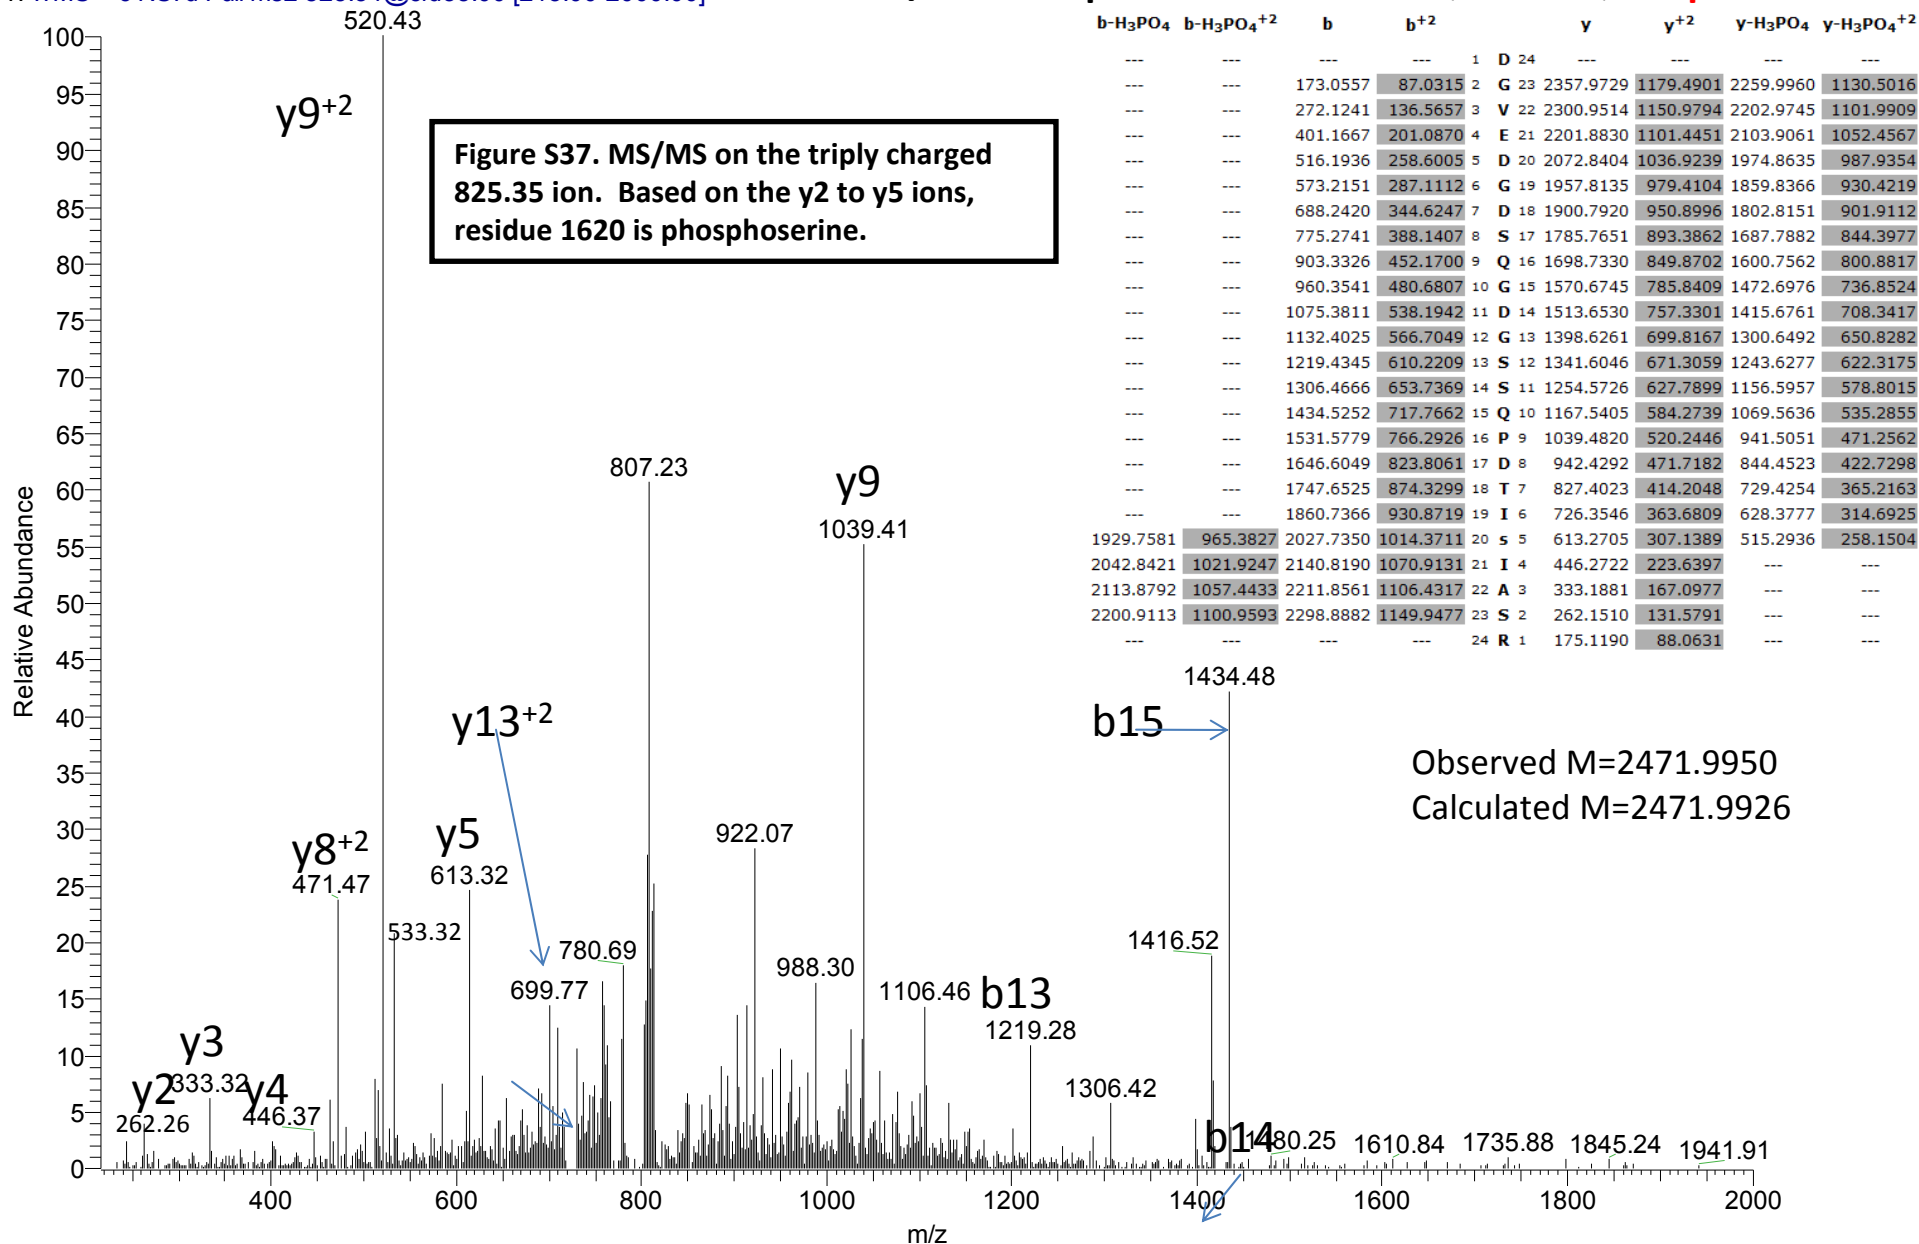

OT09-0072 #1885 RT: 25.60 AV: 1 NL: 1.62E3  
 T: ITMS + c NSI d Full ms2 970.44@cid35.00 [255.00-1955.00]

### MS/MS of Peptide R.pTpSQNTVESDKDGNLVPR.W

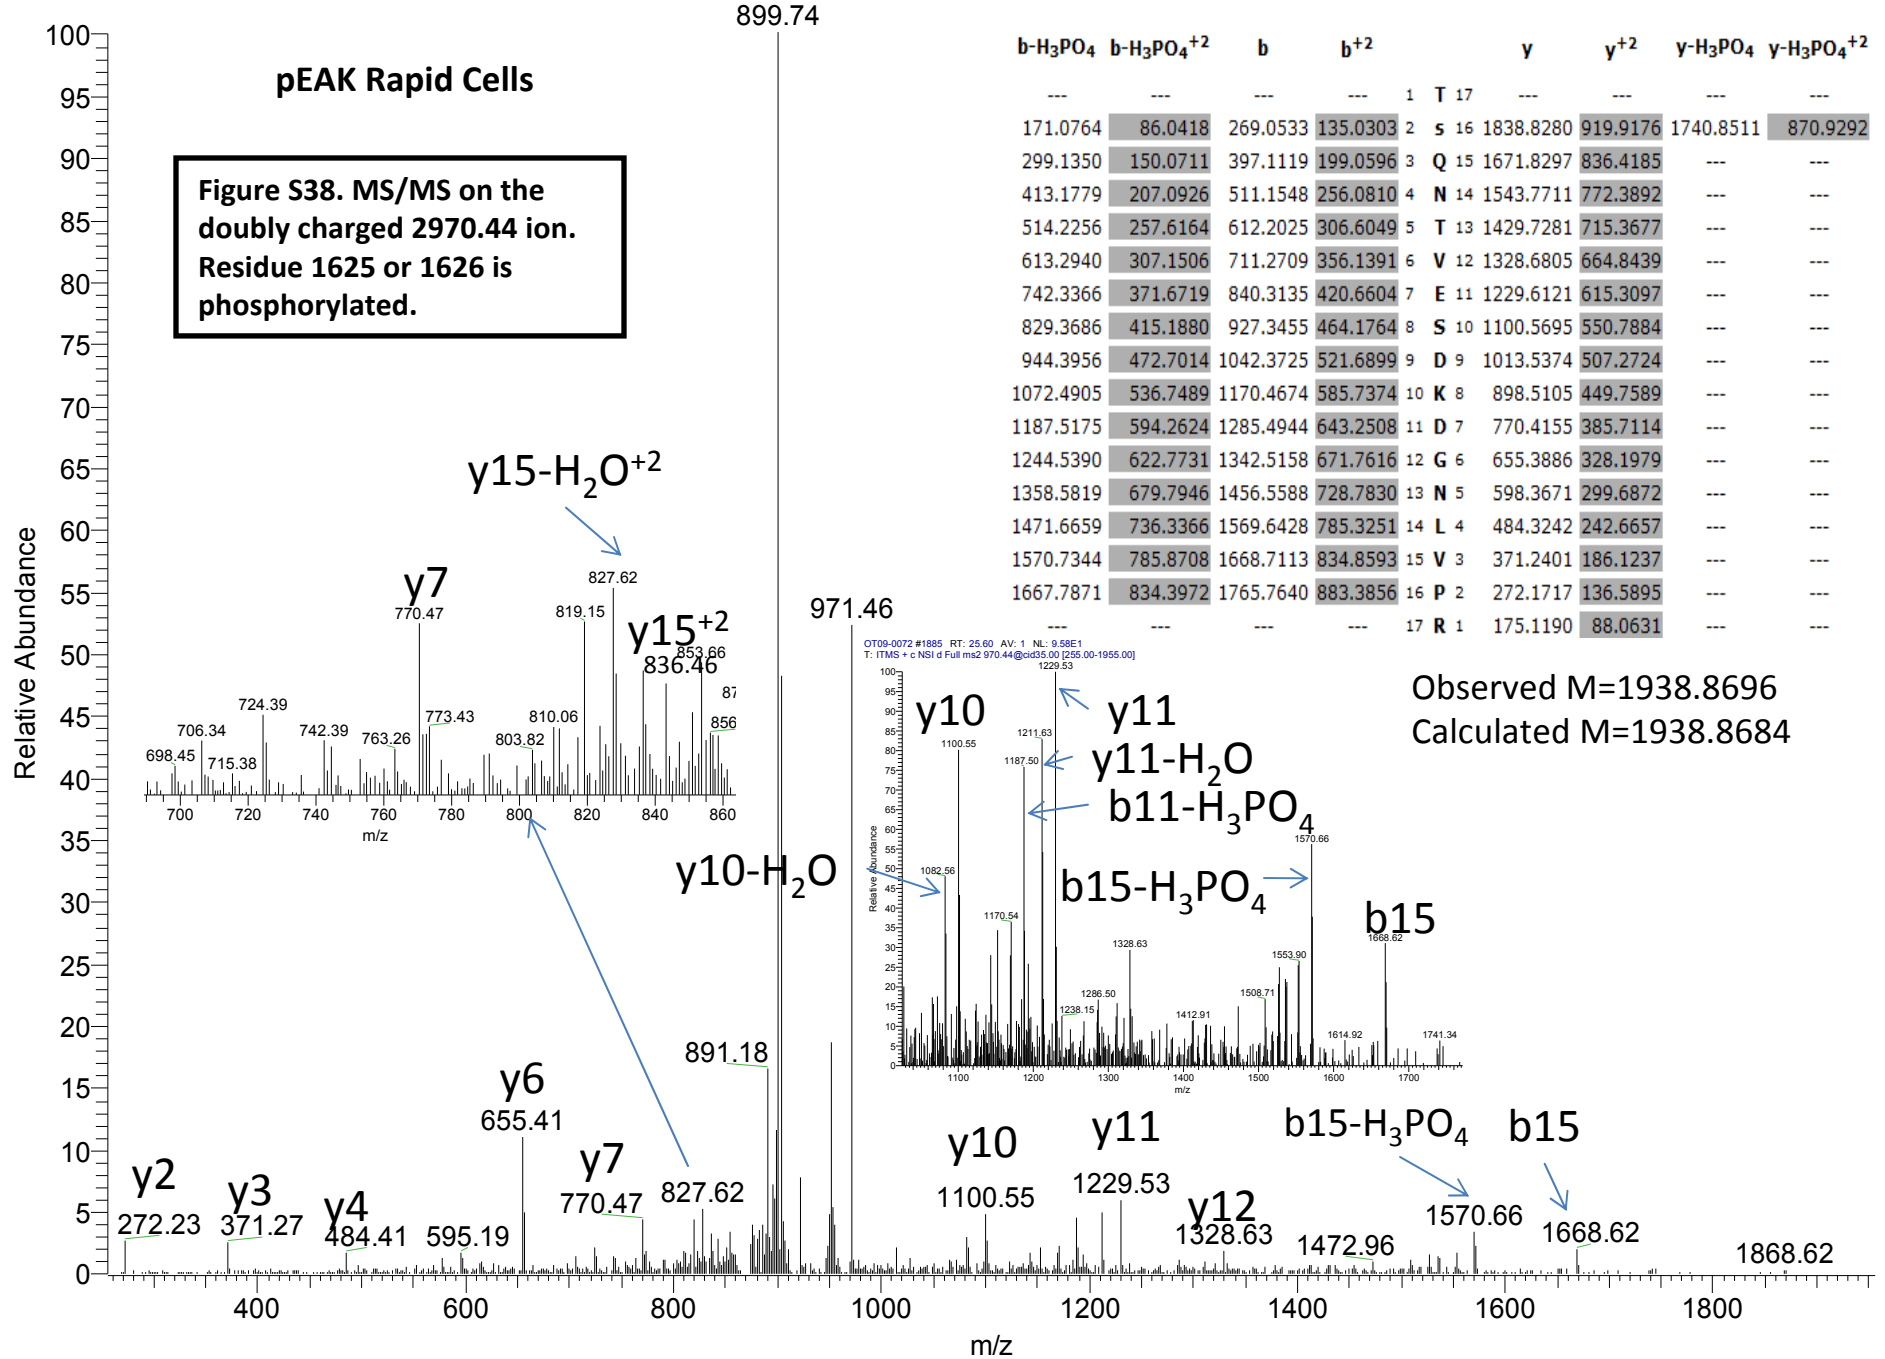



OT09-0068 #1881 RT: 25.55 AV: 1 NL: 1.81E3  
 T: ITMS + c NSI d Full ms2 970.44@cid35.00 [255.00-1955.00]

### MS/MS of Peptide R.TSQNpTVESDKDGNLVPR.W

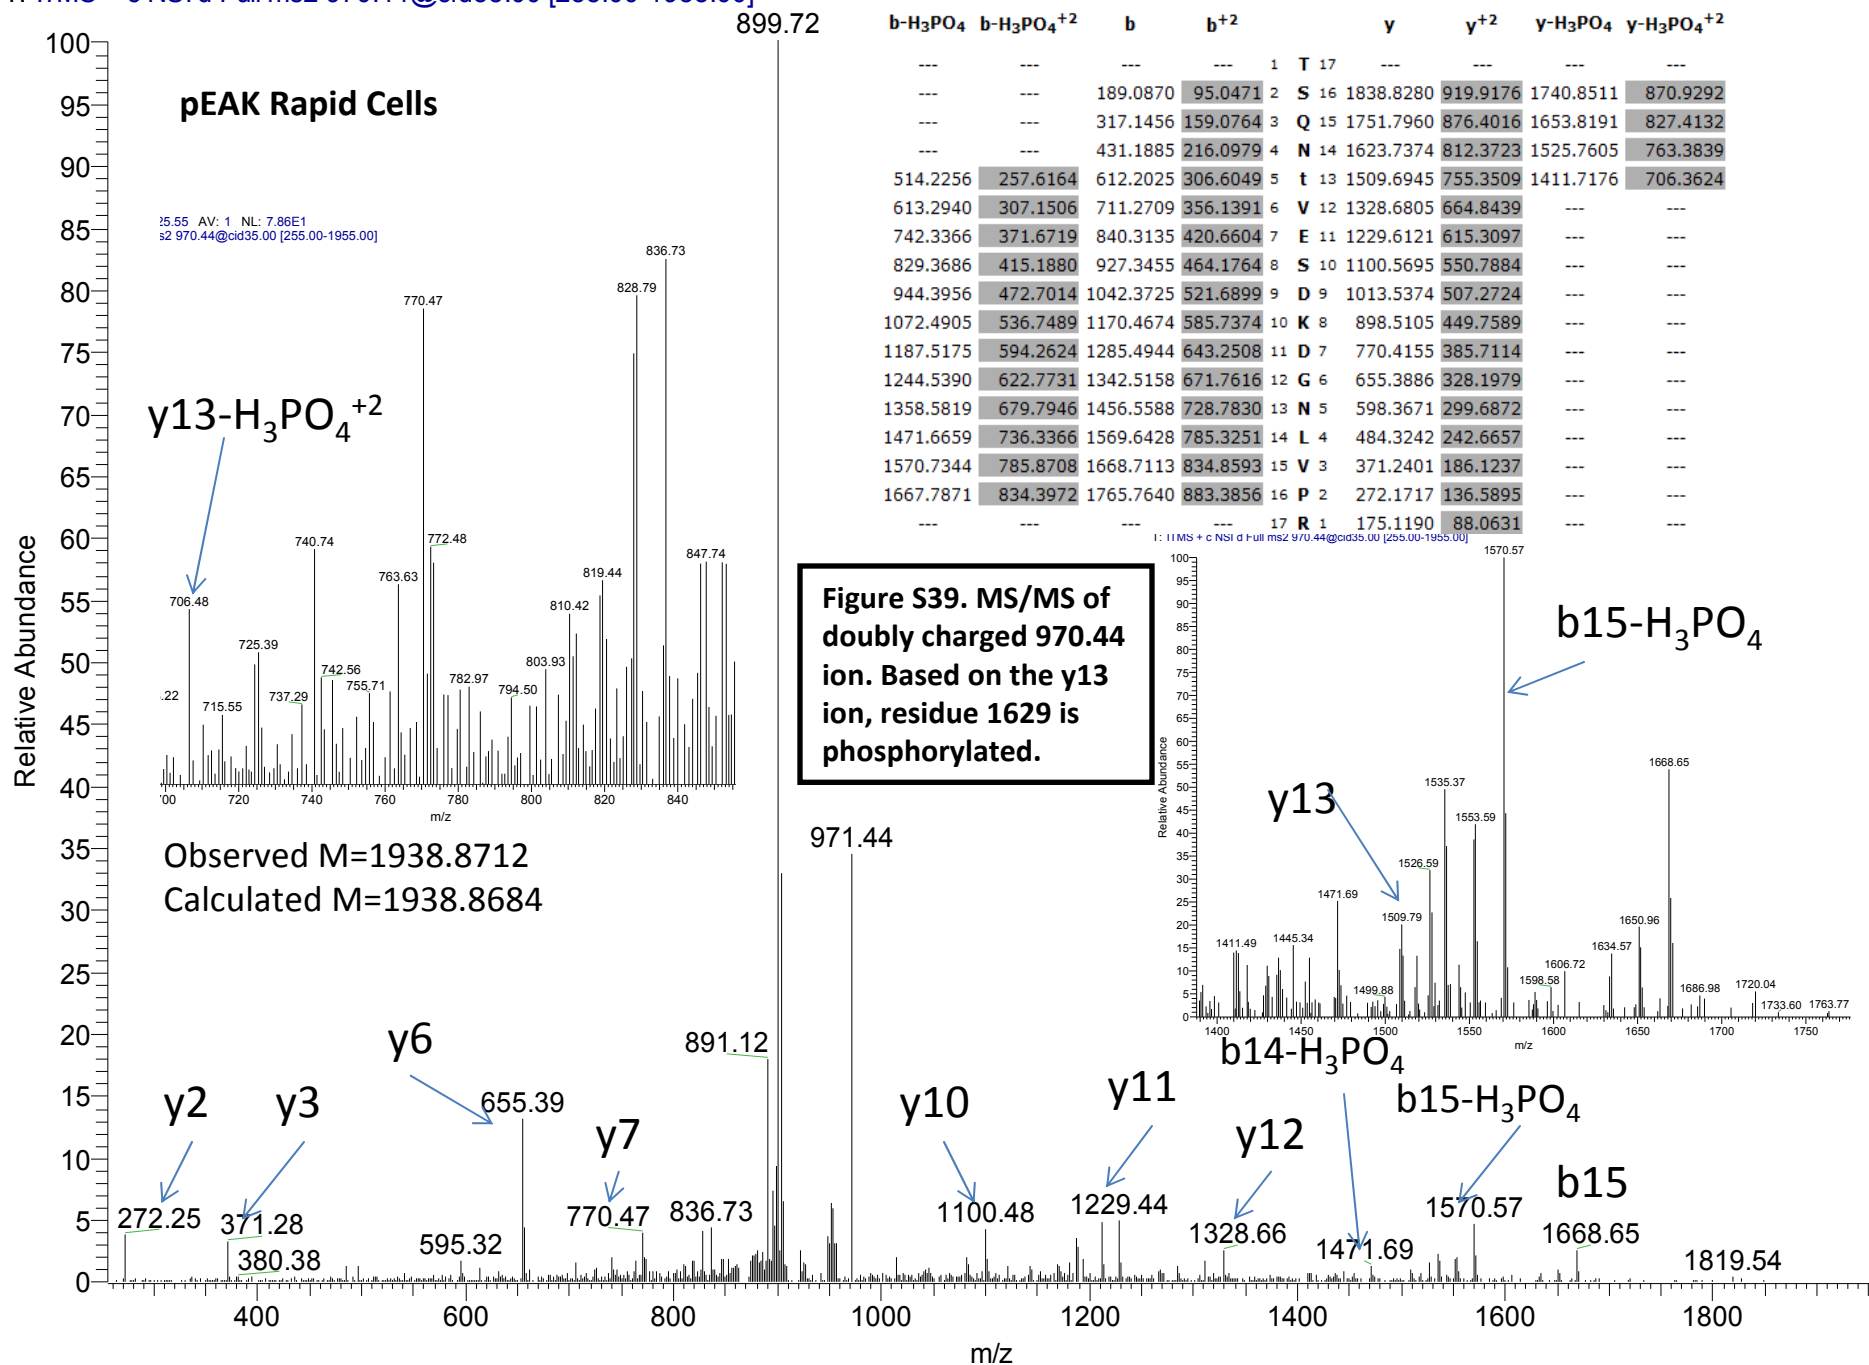

pEAK Rapid Cells

OT09-0076 #1922 RT: 25.28 AV: 1 NL: 1.05E3  
 T: ITMS + c NSI d Full ms2 970.94@cid35.00 [255.00-1955.00]

MS/MS of Peptide R.TSQNTVEpSDKDGNLVPR.W

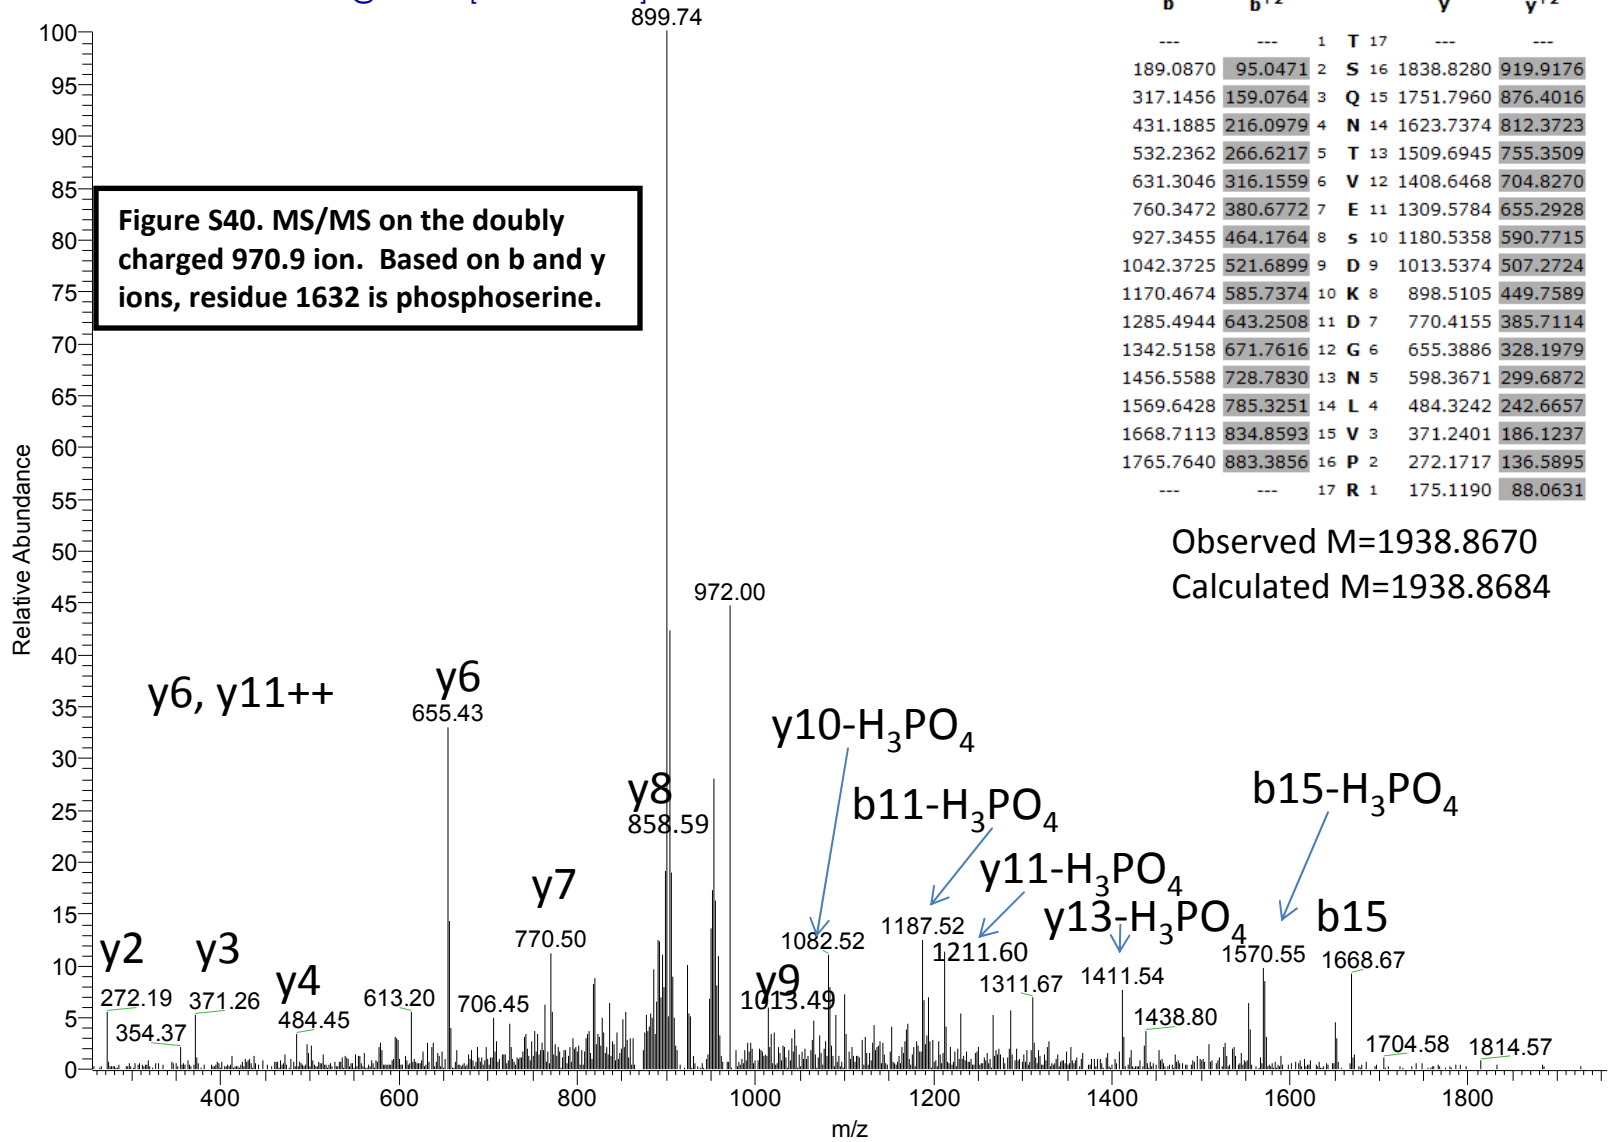



# pEAK Rapid Cells

OT09-0068 #3200 RT: 42.11 AV: 1 NL: 1.02E2  
 T: ITMS + c NSI d Full ms2 778.34@cid35.00 [200.00-1570.00]

## MS/MS of Peptide R.WHLGPGDPFS**pTYV**.-

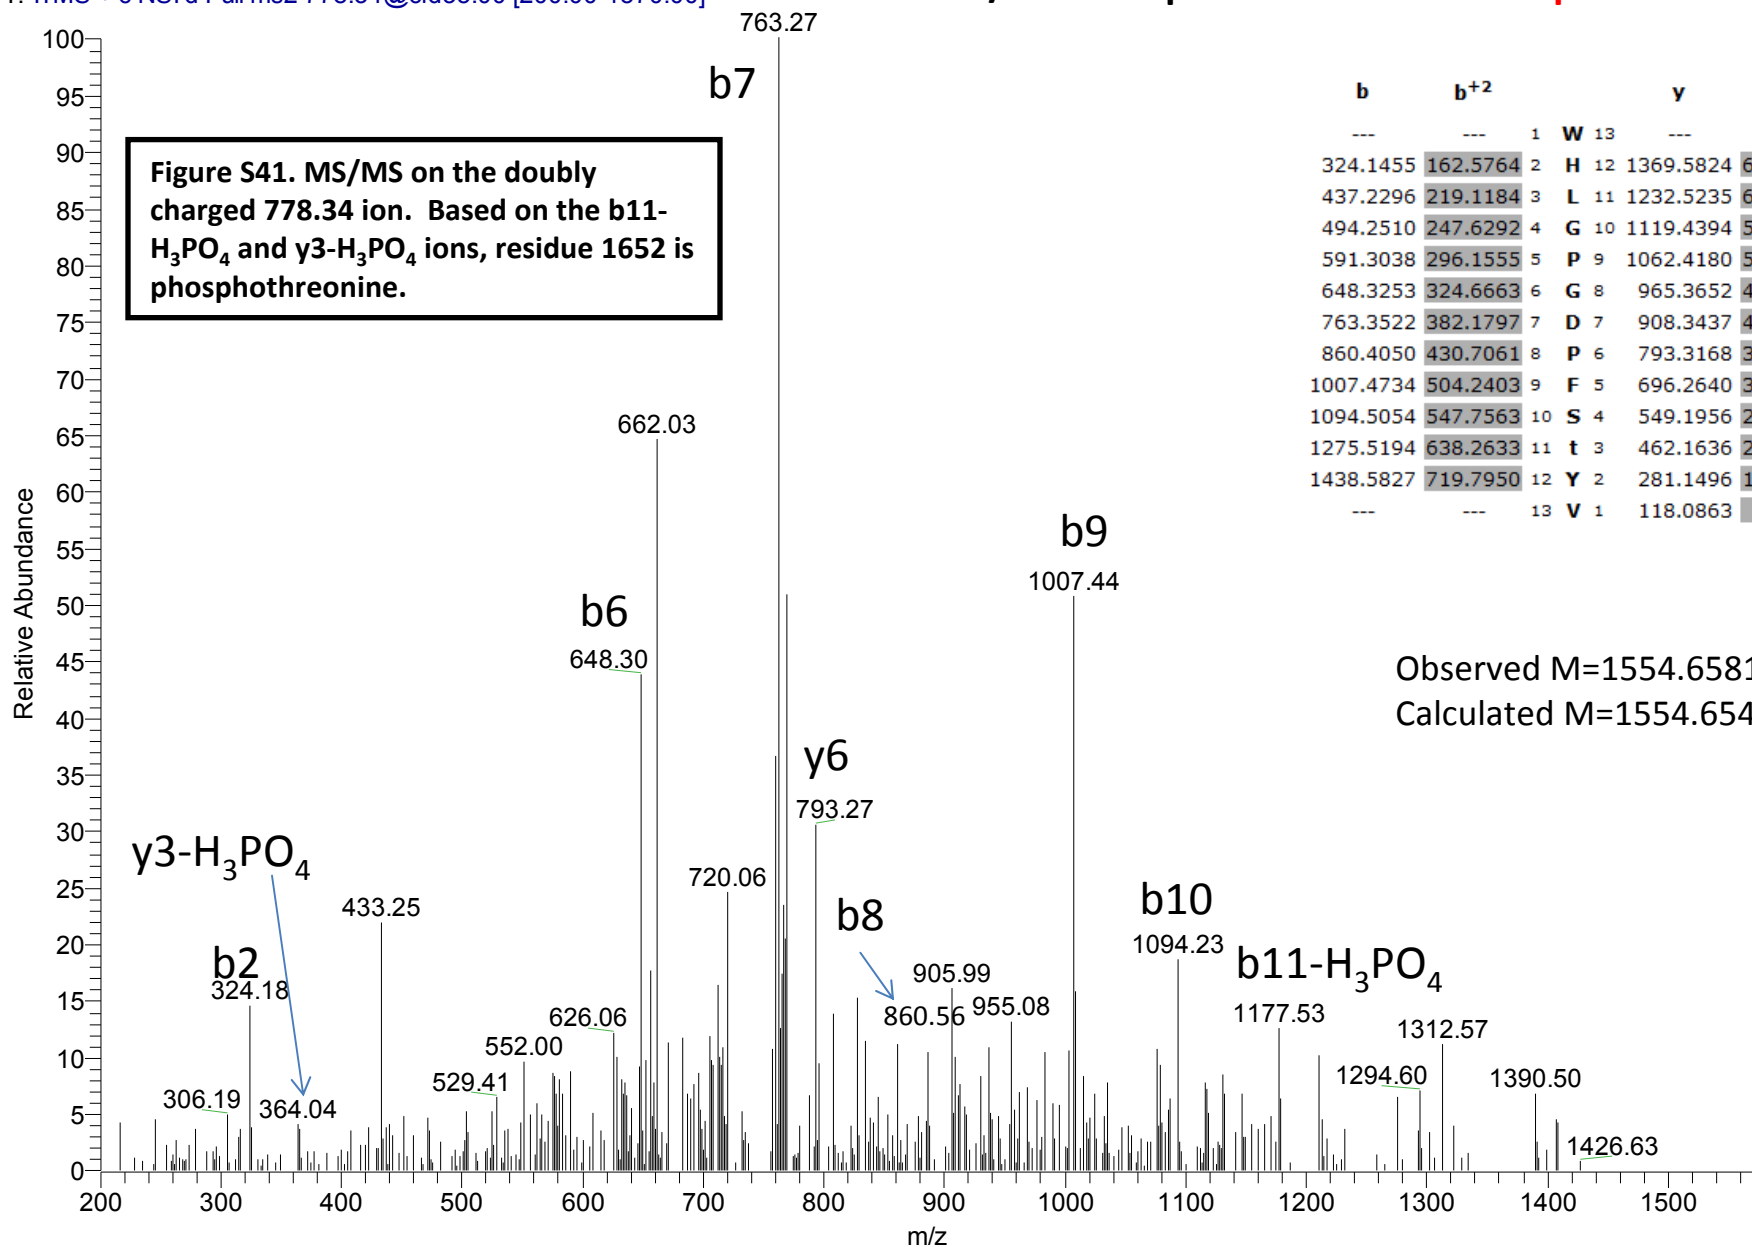

OT09-4225 #5102 RT: 58.54 AV: 1 NL: 5.55E3  
 T: ITMS + c NSI d Full ms2 971.47@cid35.00 [255.00-1955.00]

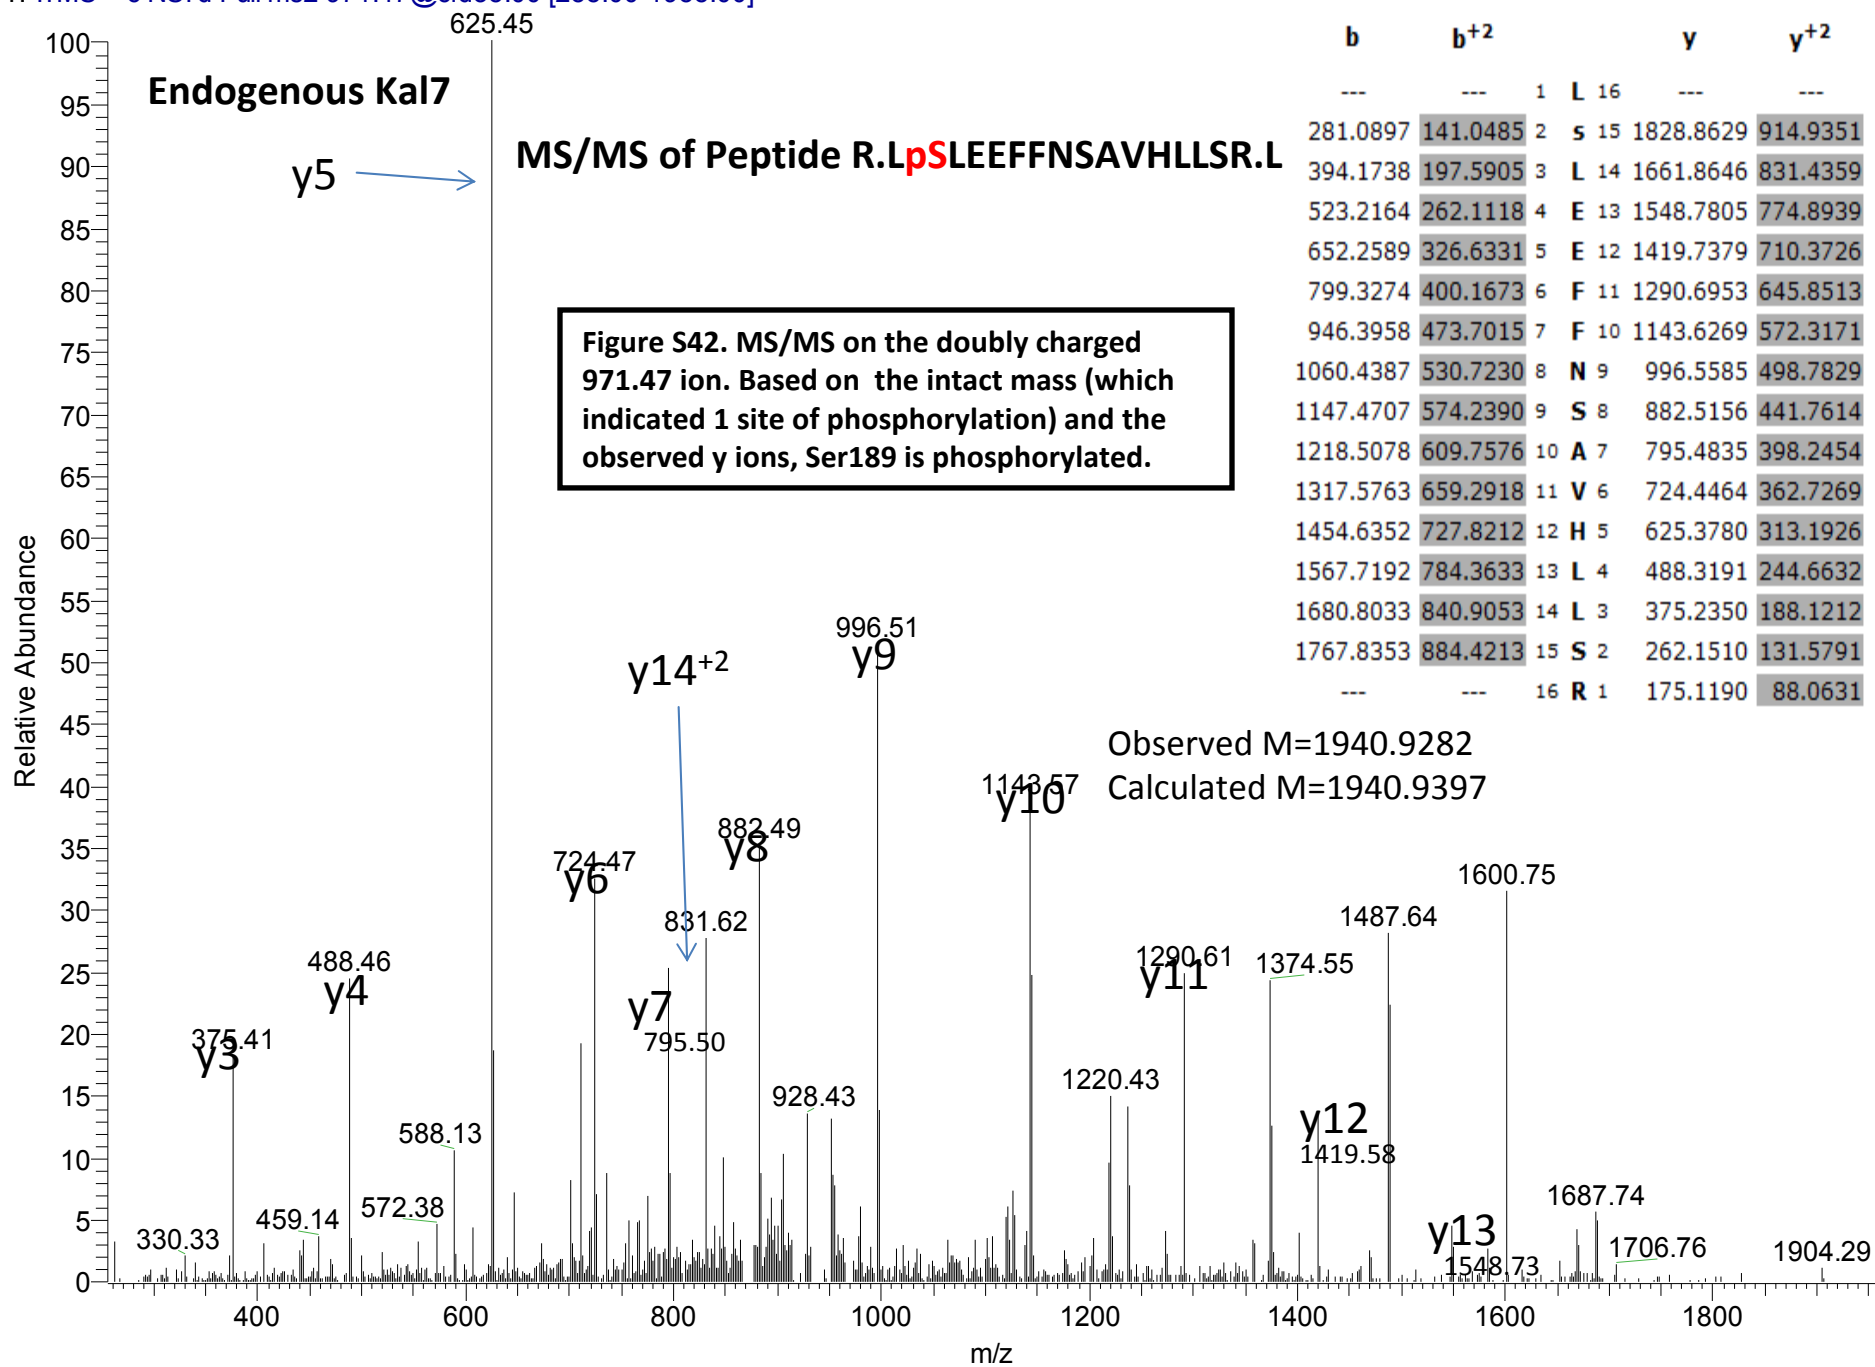

OT09-4225 #2541 RT: 33.88 AV: 1 NL: 2.11E3  
 T: ITMS + c NSI d Full ms2 756.34@cid35.00 [195.00-1525.00]

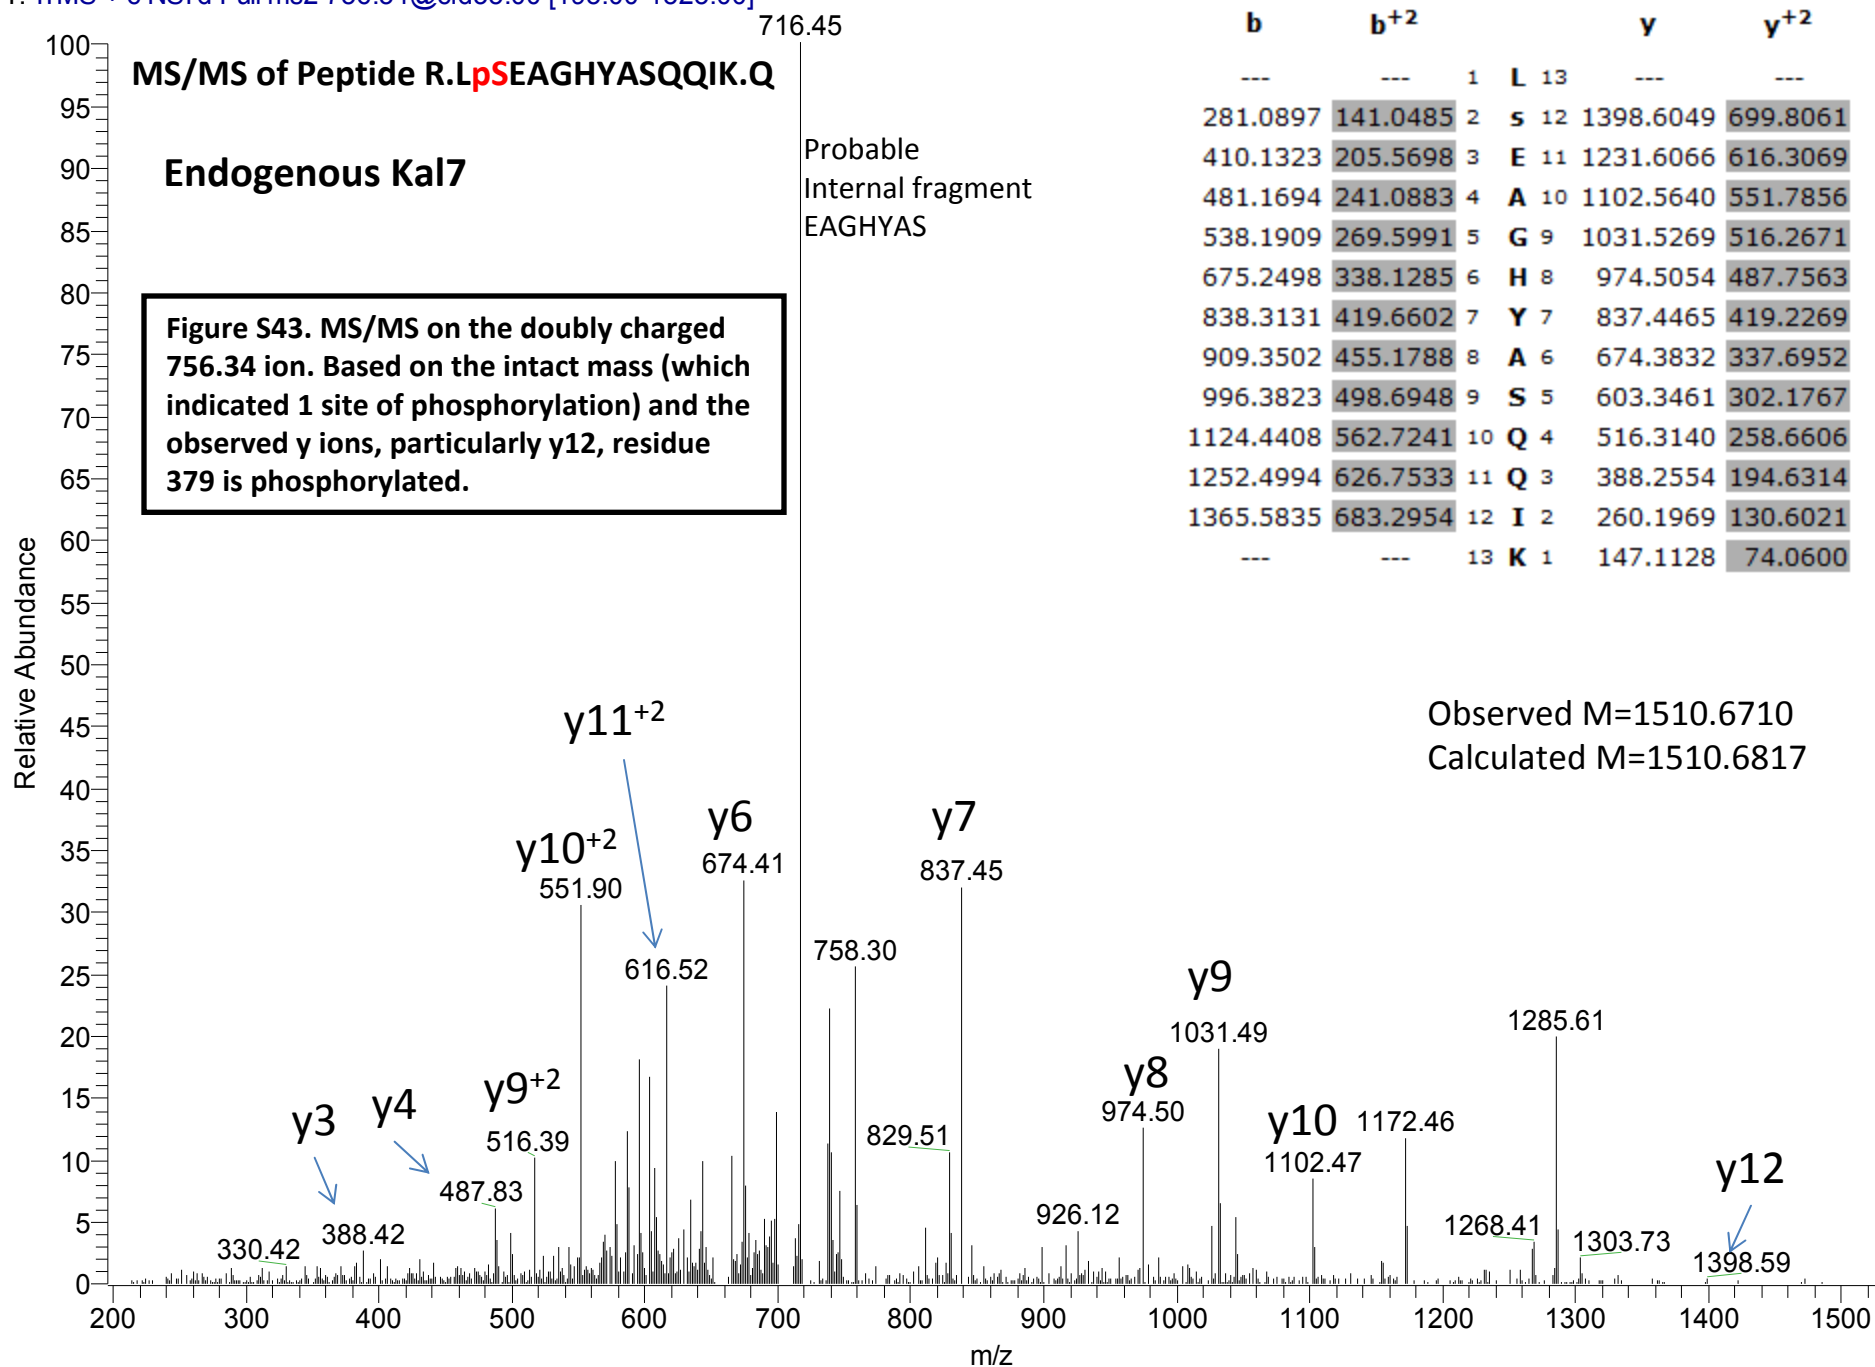

OT09-3336 #3319 RT: 47.01 AV: 1 NL: 8.07E1  
 T: ITMS + c NSI d Full ms2 942.81@cid35.00 [245.00-2000.00]

### MS/MS of Peptide K.ALLDVLQRPLpSPGNSESLTATANYSK.A

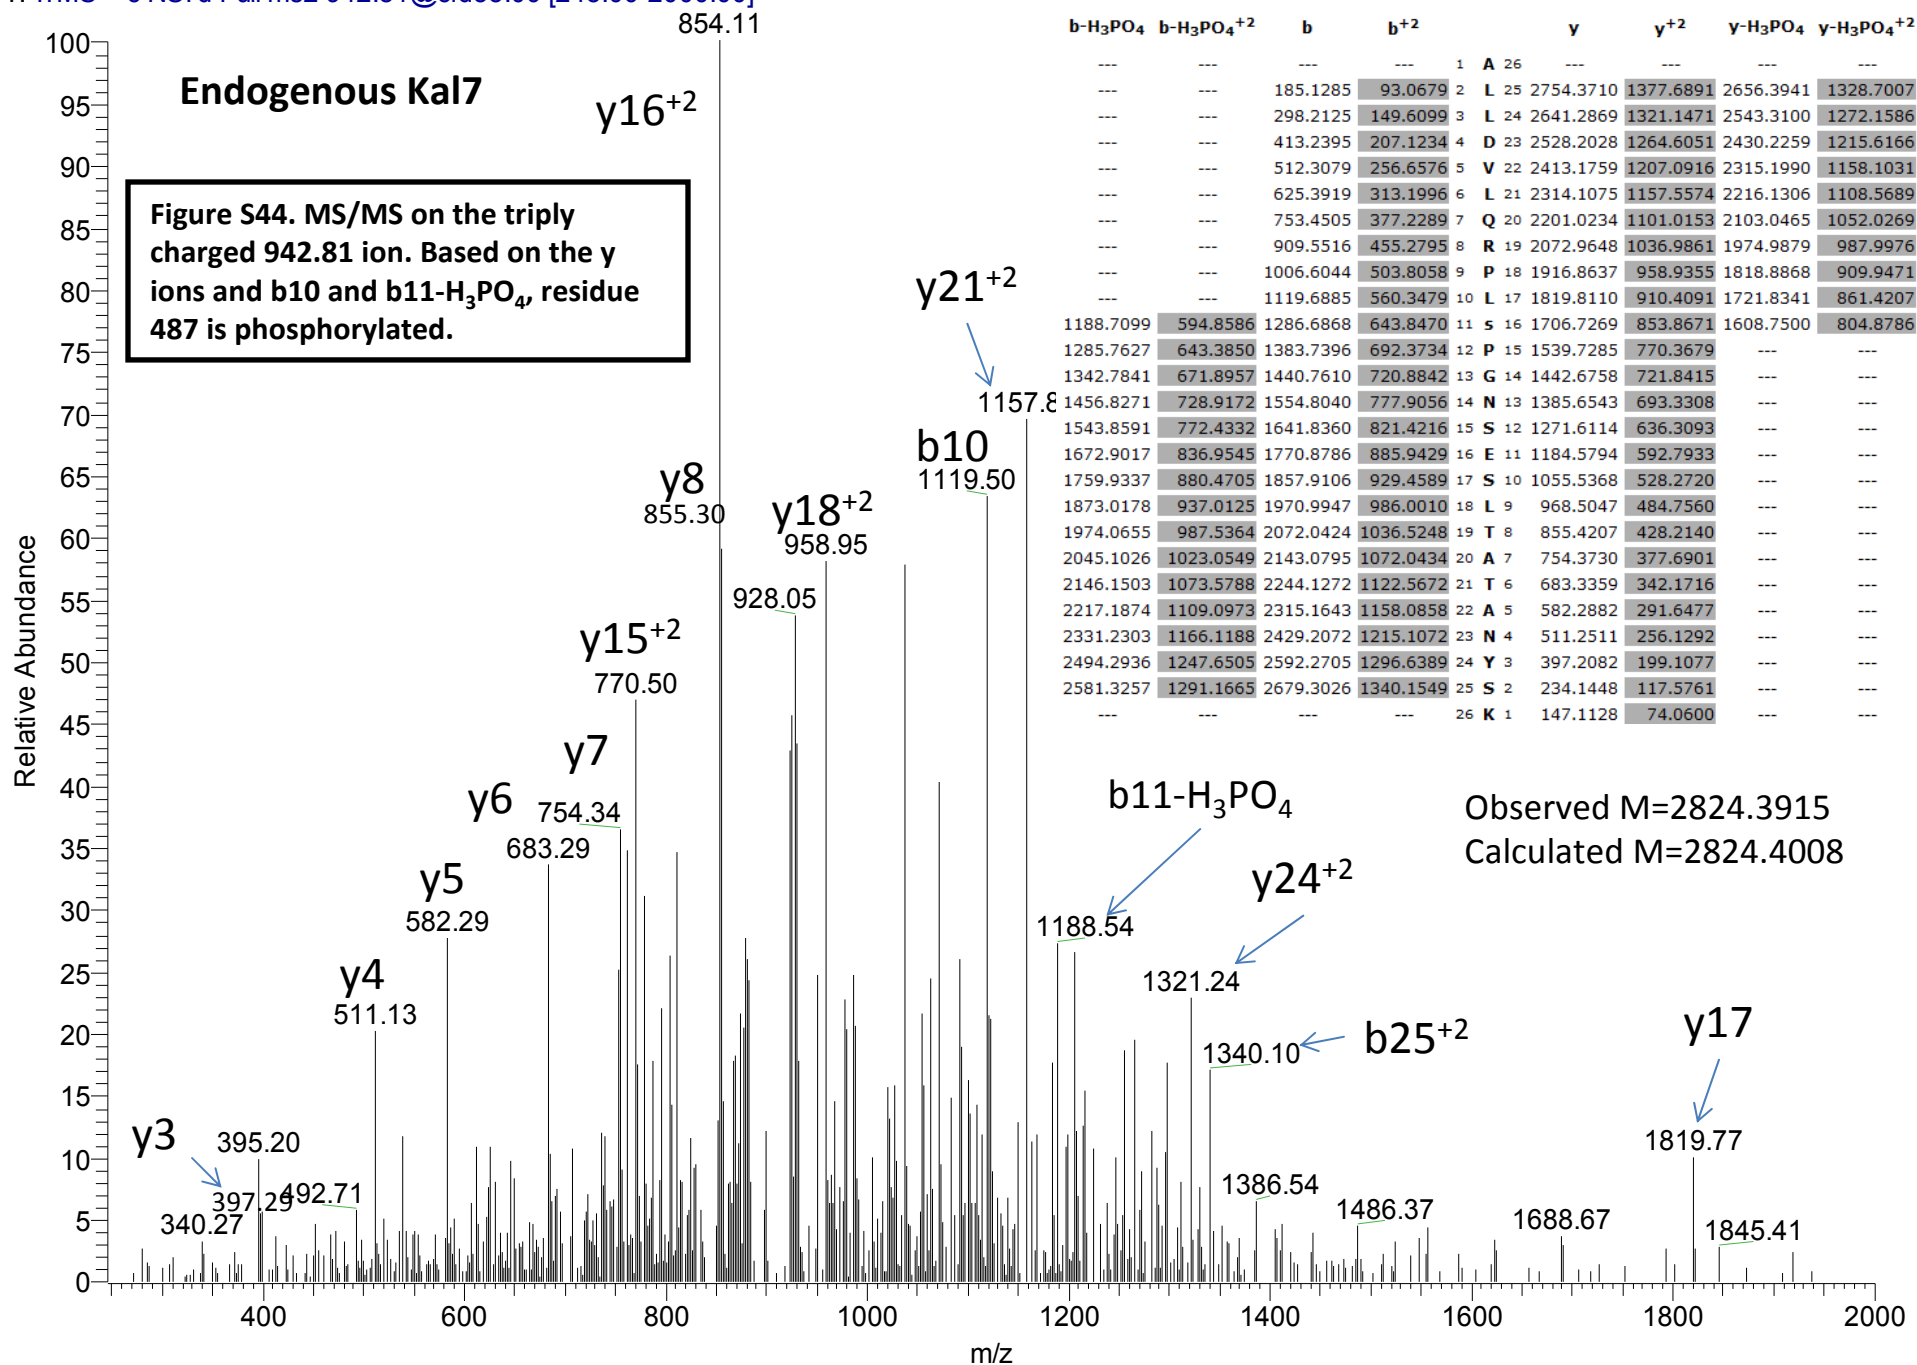

OT09-3336 #2575 RT: 37.05 AV: 1 NL: 1.34E2  
 T: ITMS + c NSI d Full ms2 744.97@cid35.00 [195.00-2000.00]

### MS/MS of Peptide K.RHDDFEEVAQNTYpTNADK.L

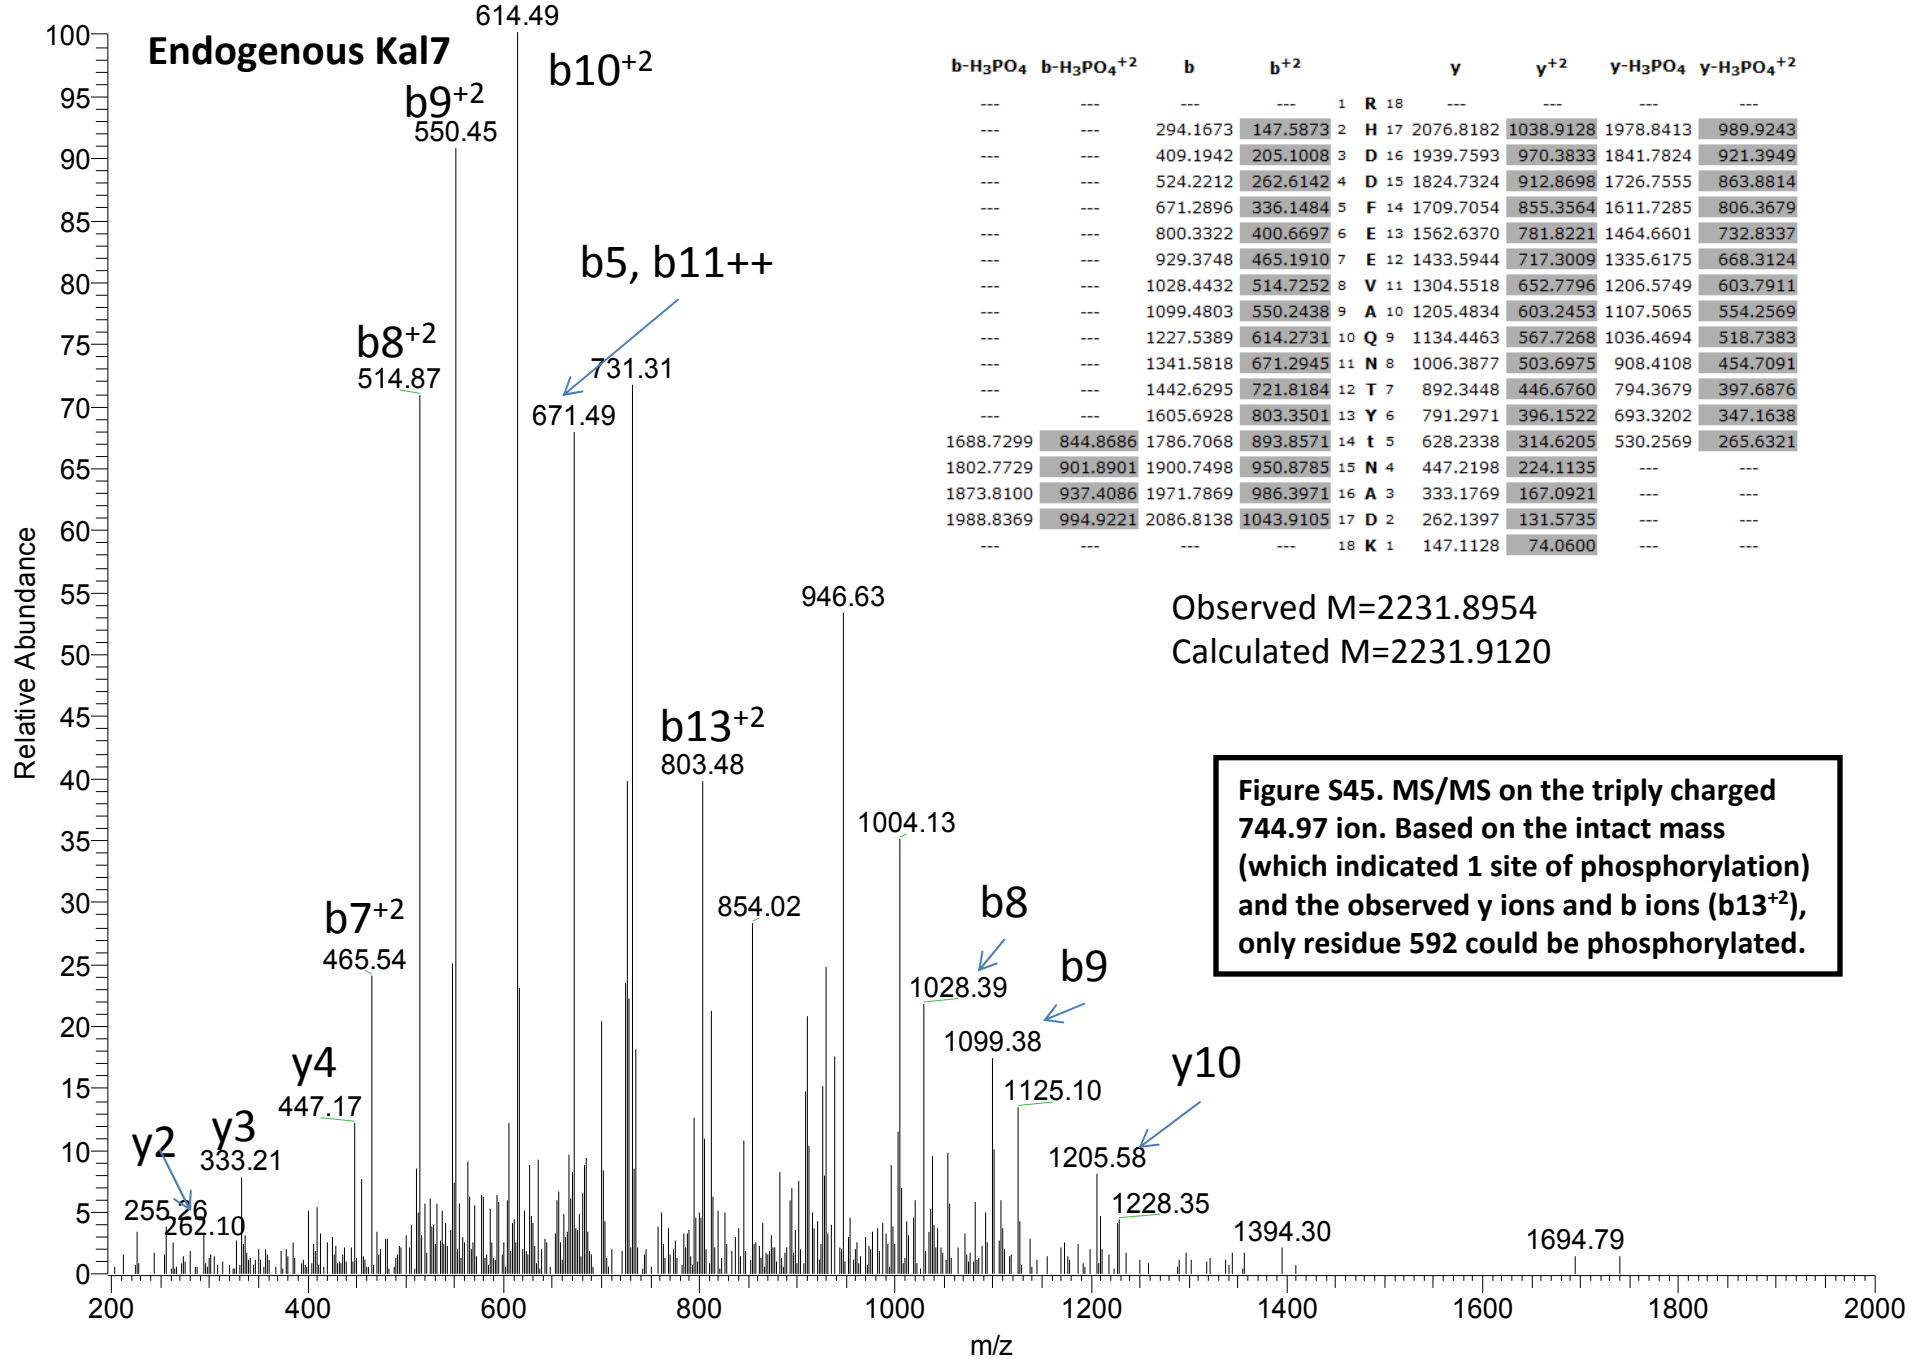

# Endogenous Kal7

## MS/MS of Peptide K.LLEAAEQLAQpTGECDPEEIYK.A

OT09-4225 #3803 RT: 45.00 AV: 1 NL: 3.91E2  
 T: ITMS + c NSI d Full ms2 1216.04@cid35.00 [320.00-2000.00]

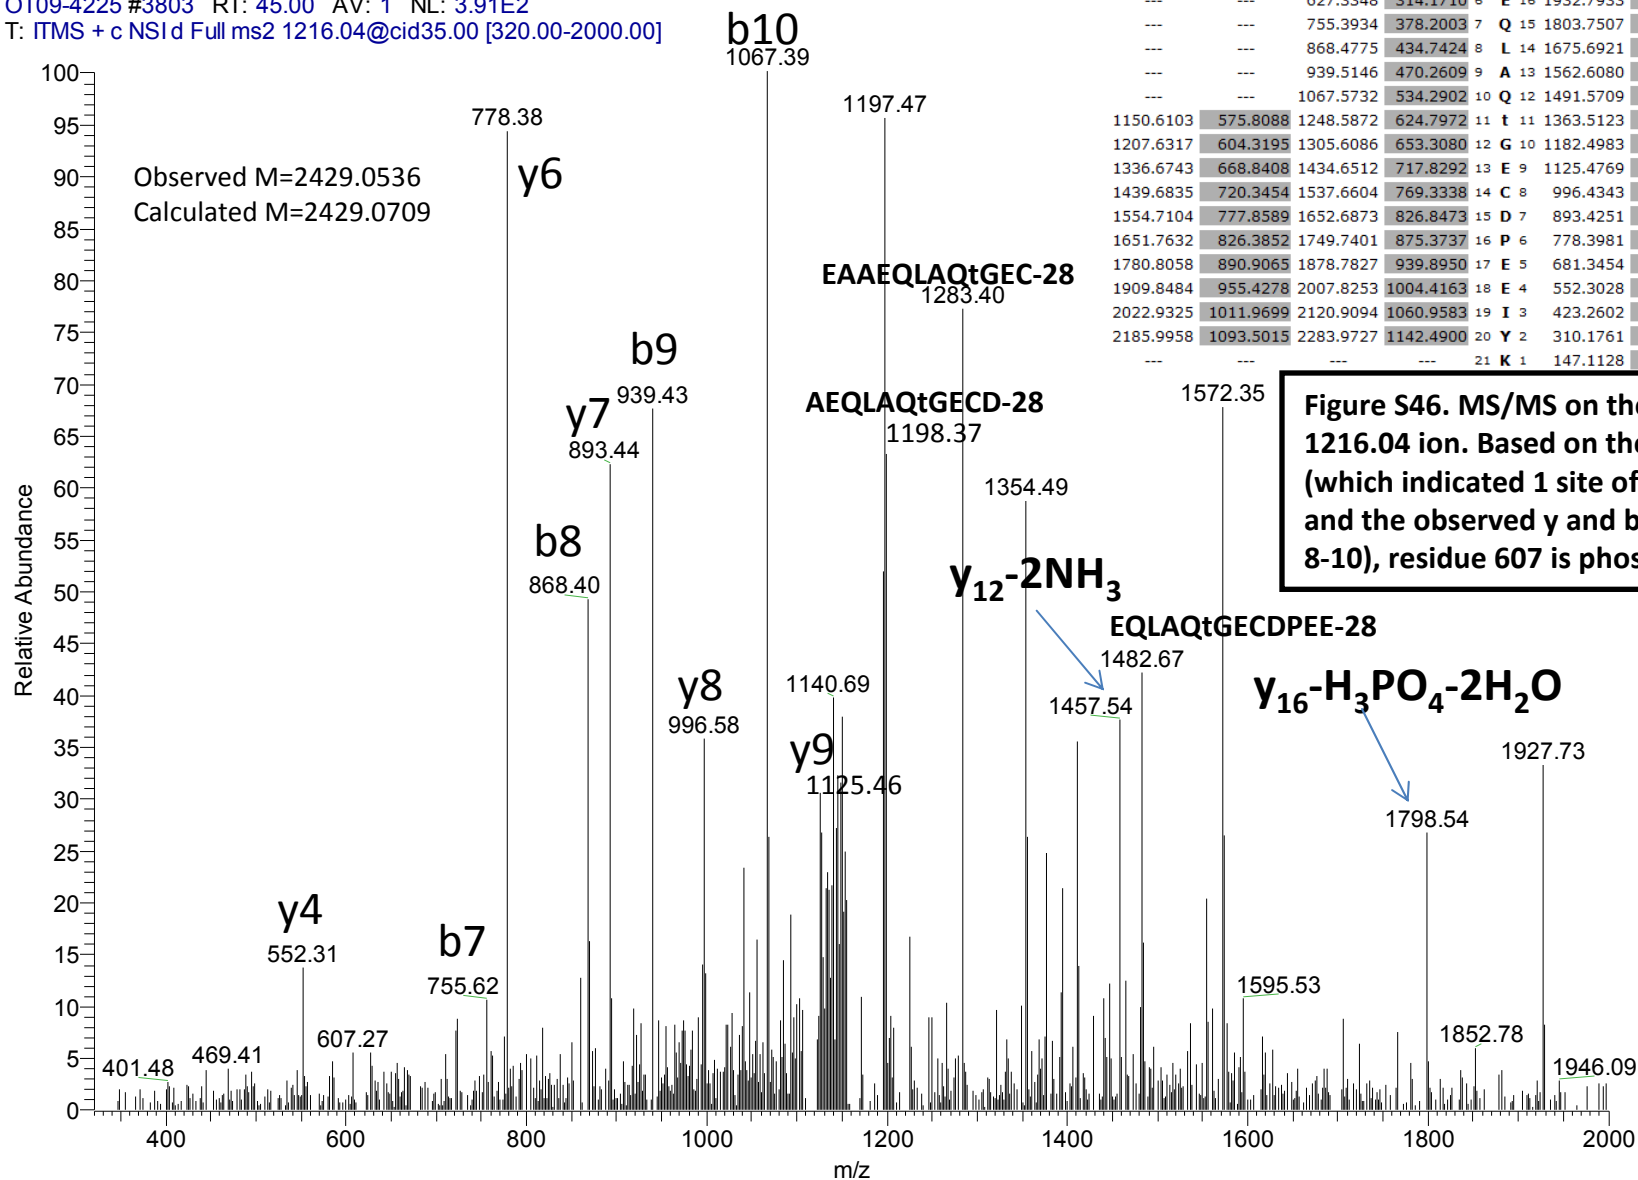

| b-H <sub>3</sub> PO <sub>4</sub> | b-H <sub>3</sub> PO <sub>4</sub> <sup>+2</sup> | b         | b <sup>+2</sup> |    | y | y <sup>+2</sup> | y-H <sub>3</sub> PO <sub>4</sub> | y-H <sub>3</sub> PO <sub>4</sub> <sup>+2</sup> |
|----------------------------------|------------------------------------------------|-----------|-----------------|----|---|-----------------|----------------------------------|------------------------------------------------|
| ---                              | ---                                            | ---       | ---             | 1  | L | 21              | ---                              | ---                                            |
| ---                              | ---                                            | 227.1754  | 114.0913        | 2  | L | 20              | 2316.9942                        | 1159.0007                                      |
| ---                              | ---                                            | 356.2180  | 178.6126        | 3  | E | 19              | 2203.9101                        | 1102.4587                                      |
| ---                              | ---                                            | 427.2551  | 214.1312        | 4  | A | 18              | 2074.8675                        | 1037.9374                                      |
| ---                              | ---                                            | 498.2922  | 249.6498        | 5  | A | 17              | 2003.8304                        | 1002.4188                                      |
| ---                              | ---                                            | 627.3348  | 314.1710        | 6  | E | 16              | 1932.7933                        | 966.9003                                       |
| ---                              | ---                                            | 755.3934  | 378.2003        | 7  | Q | 15              | 1803.7507                        | 902.3790                                       |
| ---                              | ---                                            | 868.4775  | 434.7424        | 8  | L | 14              | 1675.6921                        | 838.3497                                       |
| ---                              | ---                                            | 939.5146  | 470.2609        | 9  | A | 13              | 1562.6080                        | 781.8077                                       |
| ---                              | ---                                            | 1067.5732 | 534.2902        | 10 | Q | 12              | 1491.5709                        | 746.2891                                       |
| 1150.6103                        | 575.8088                                       | 1248.5872 | 624.7972        | 11 | t | 11              | 1363.5123                        | 682.2598                                       |
| 1207.6317                        | 604.3195                                       | 1305.6086 | 653.3080        | 12 | G | 10              | 1182.4983                        | 591.7528                                       |
| 1336.6743                        | 668.8408                                       | 1434.6512 | 717.8292        | 13 | E | 9               | 1125.4769                        | 563.2421                                       |
| 1439.6835                        | 720.3454                                       | 1537.6604 | 769.3338        | 14 | C | 8               | 996.4343                         | 498.7208                                       |
| 1554.7104                        | 777.8589                                       | 1652.6873 | 826.8473        | 15 | D | 7               | 893.4251                         | 447.2162                                       |
| 1651.7632                        | 826.3852                                       | 1749.7401 | 875.3737        | 16 | P | 6               | 778.3981                         | 389.7027                                       |
| 1780.8058                        | 890.9065                                       | 1878.7827 | 939.8950        | 17 | E | 5               | 681.3454                         | 341.1763                                       |
| 1909.8484                        | 955.4278                                       | 2007.8253 | 1004.4163       | 18 | E | 4               | 552.3028                         | 276.6550                                       |
| 2022.9325                        | 1011.9699                                      | 2120.9094 | 1060.9583       | 19 | I | 3               | 423.2602                         | 212.1337                                       |
| 2185.9958                        | 1093.5015                                      | 2283.9727 | 1142.4900       | 20 | Y | 2               | 310.1761                         | 155.5917                                       |
| ---                              | ---                                            | ---       | ---             | 21 | K | 1               | 147.1128                         | 74.0600                                        |

Figure S46. MS/MS on the doubly charged 1216.04 ion. Based on the intact mass (which indicated 1 site of phosphorylation) and the observed y and b ions, (y4-9 and b 8-10), residue 607 is phosphorylated.

OT09-3353 #4247 RT: 51.48 AV: 1 NL: 5.60E2  
 T: ITMS + c NSI d Full ms2 1078.98@cid35.00 [285.00-2000.00]

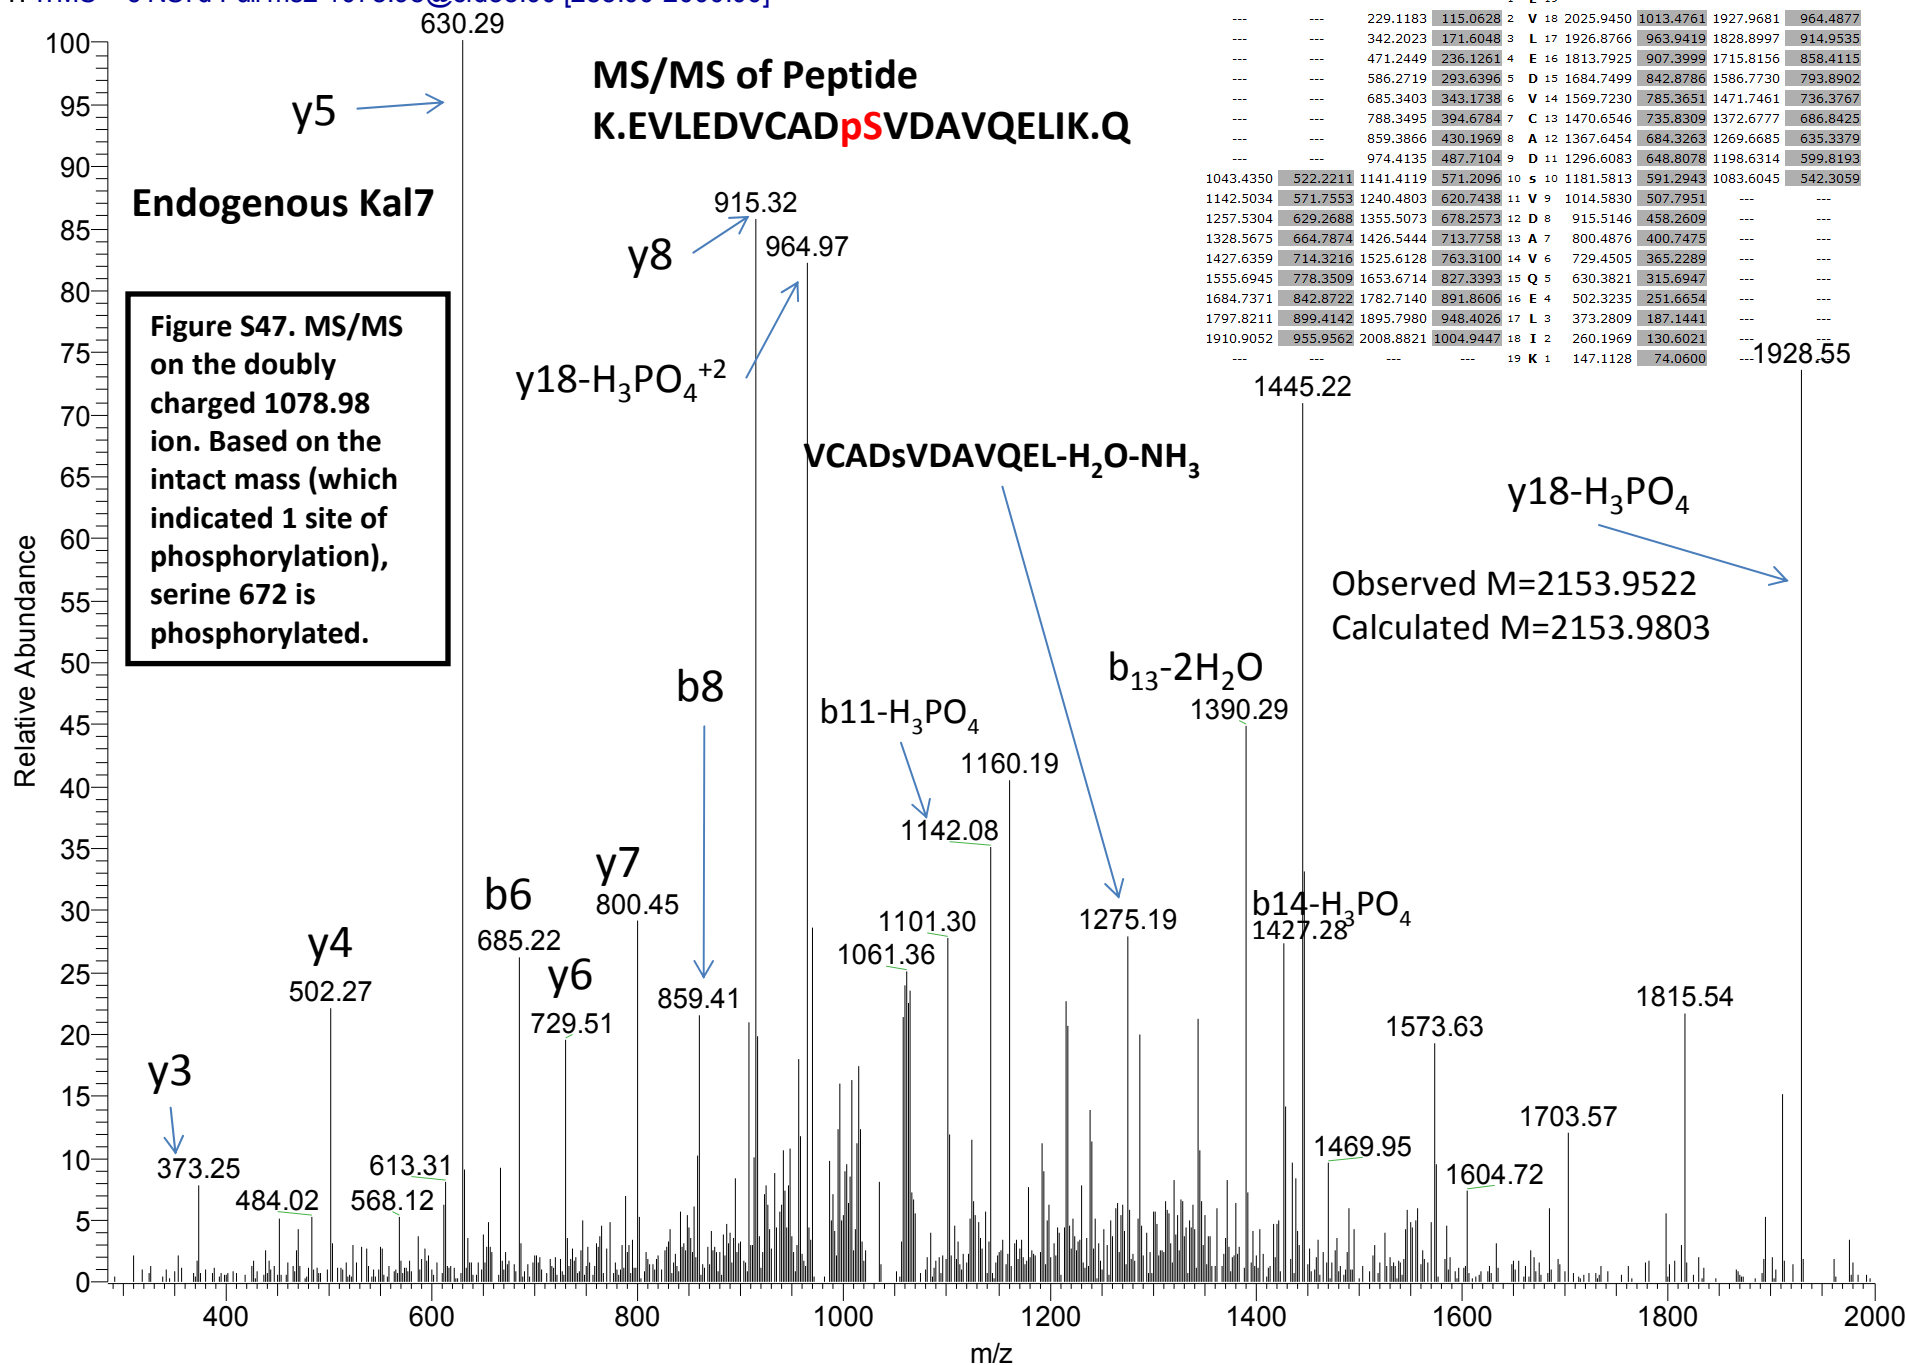

OT09-3336 #2471 RT: 35.63 AV: 1 NL: 6.60E2  
 T: ITMS + c NSI d Full ms2 696.31@cid35.00 [180.00-1405.00]

### MS/MS of Peptide R.SAPPpSLGEPTEAR.D

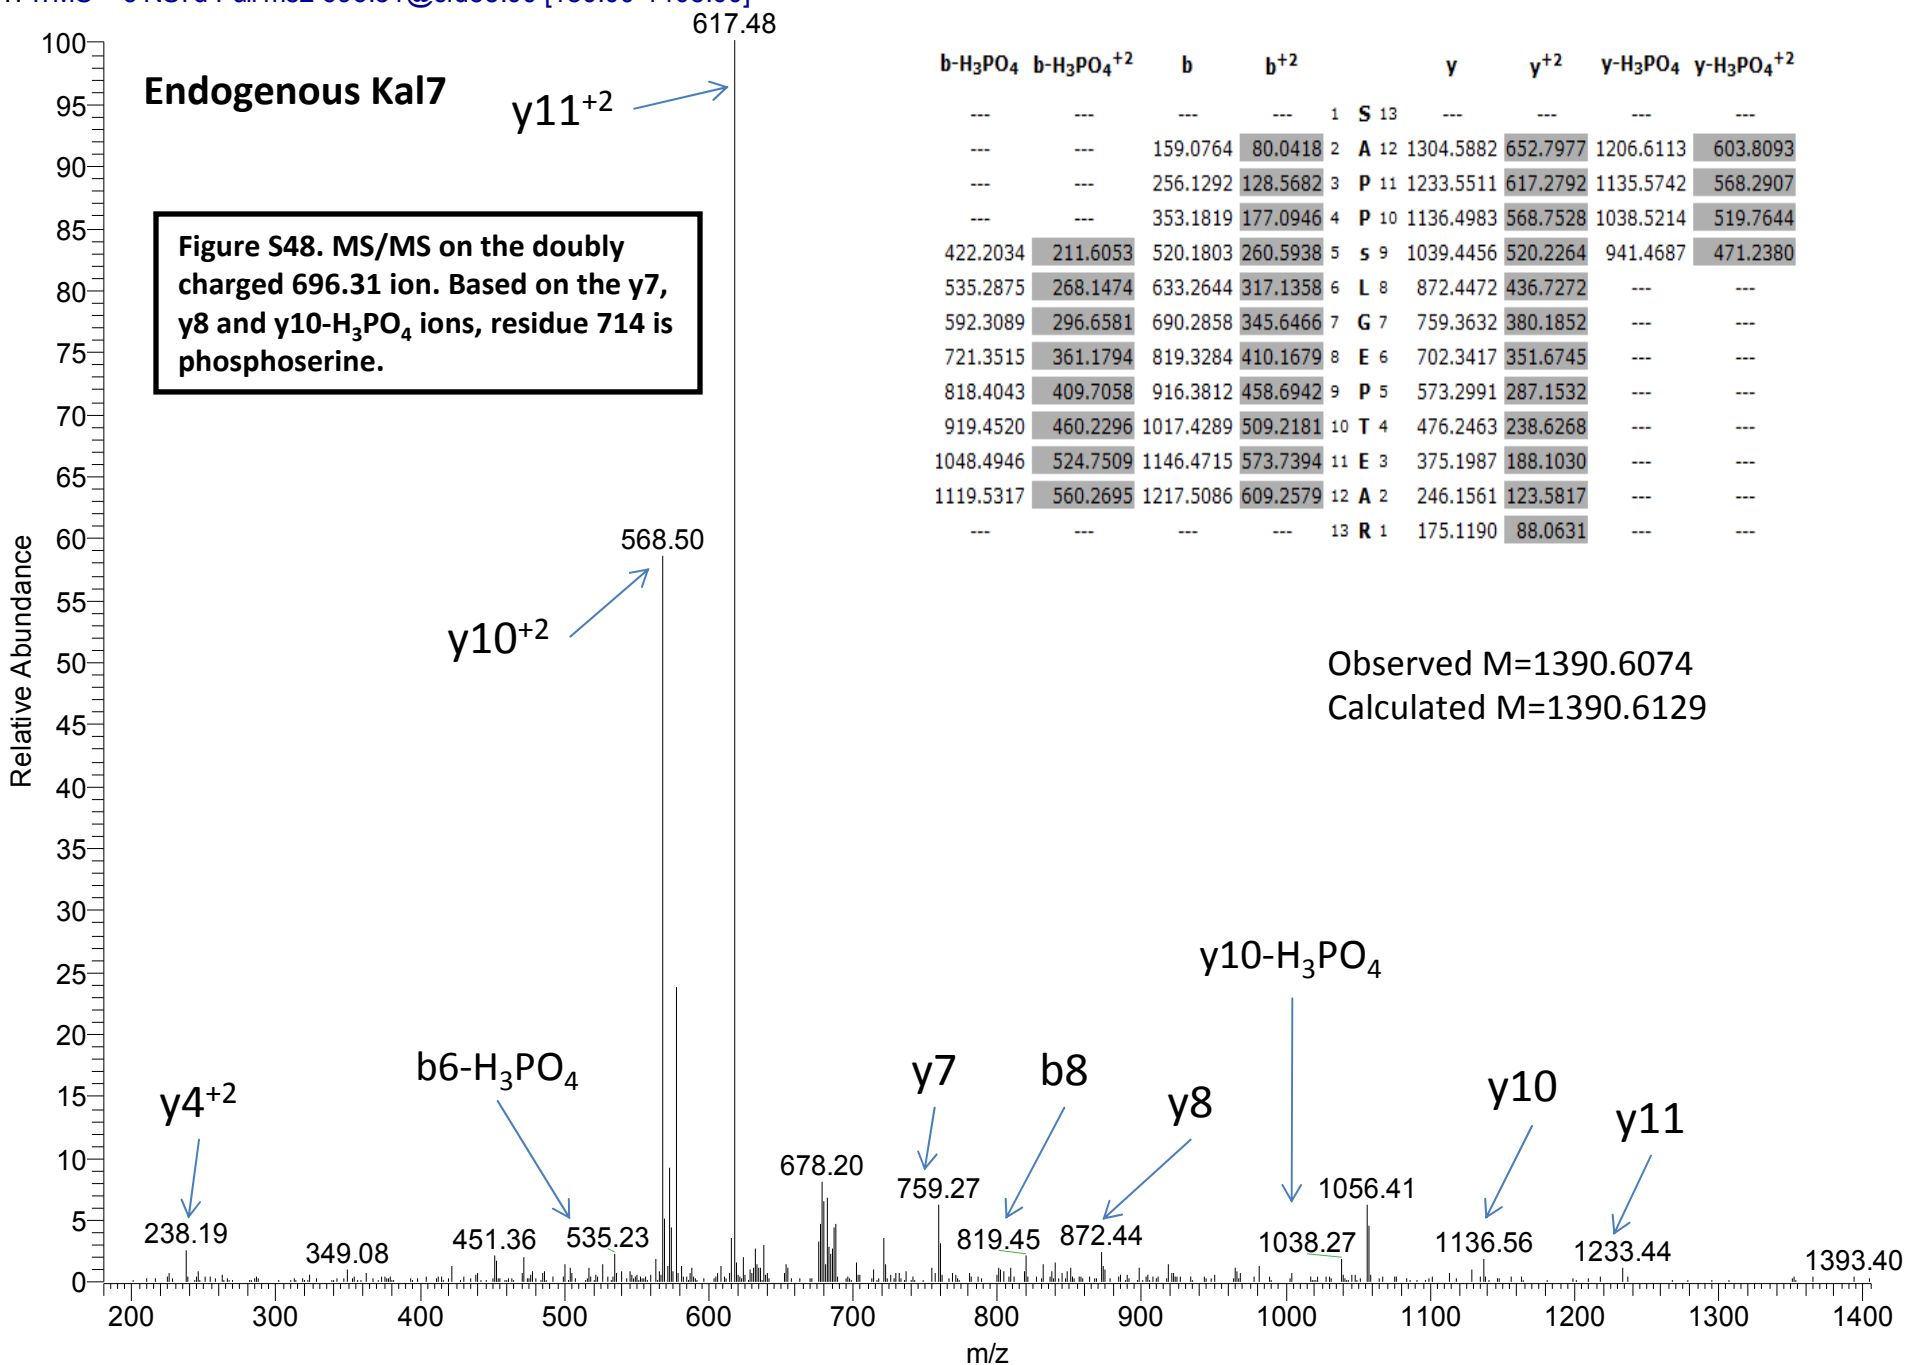



OT09-4225 #2307 RT: 31.46 AV: 1 NL: 3.28E3  
 T: ITMS + c NSI d Full ms2 674.82@cid35.00 [175.00-1360.00]

### MS/MS of Peptide K.pTHQSALQVQQK.A

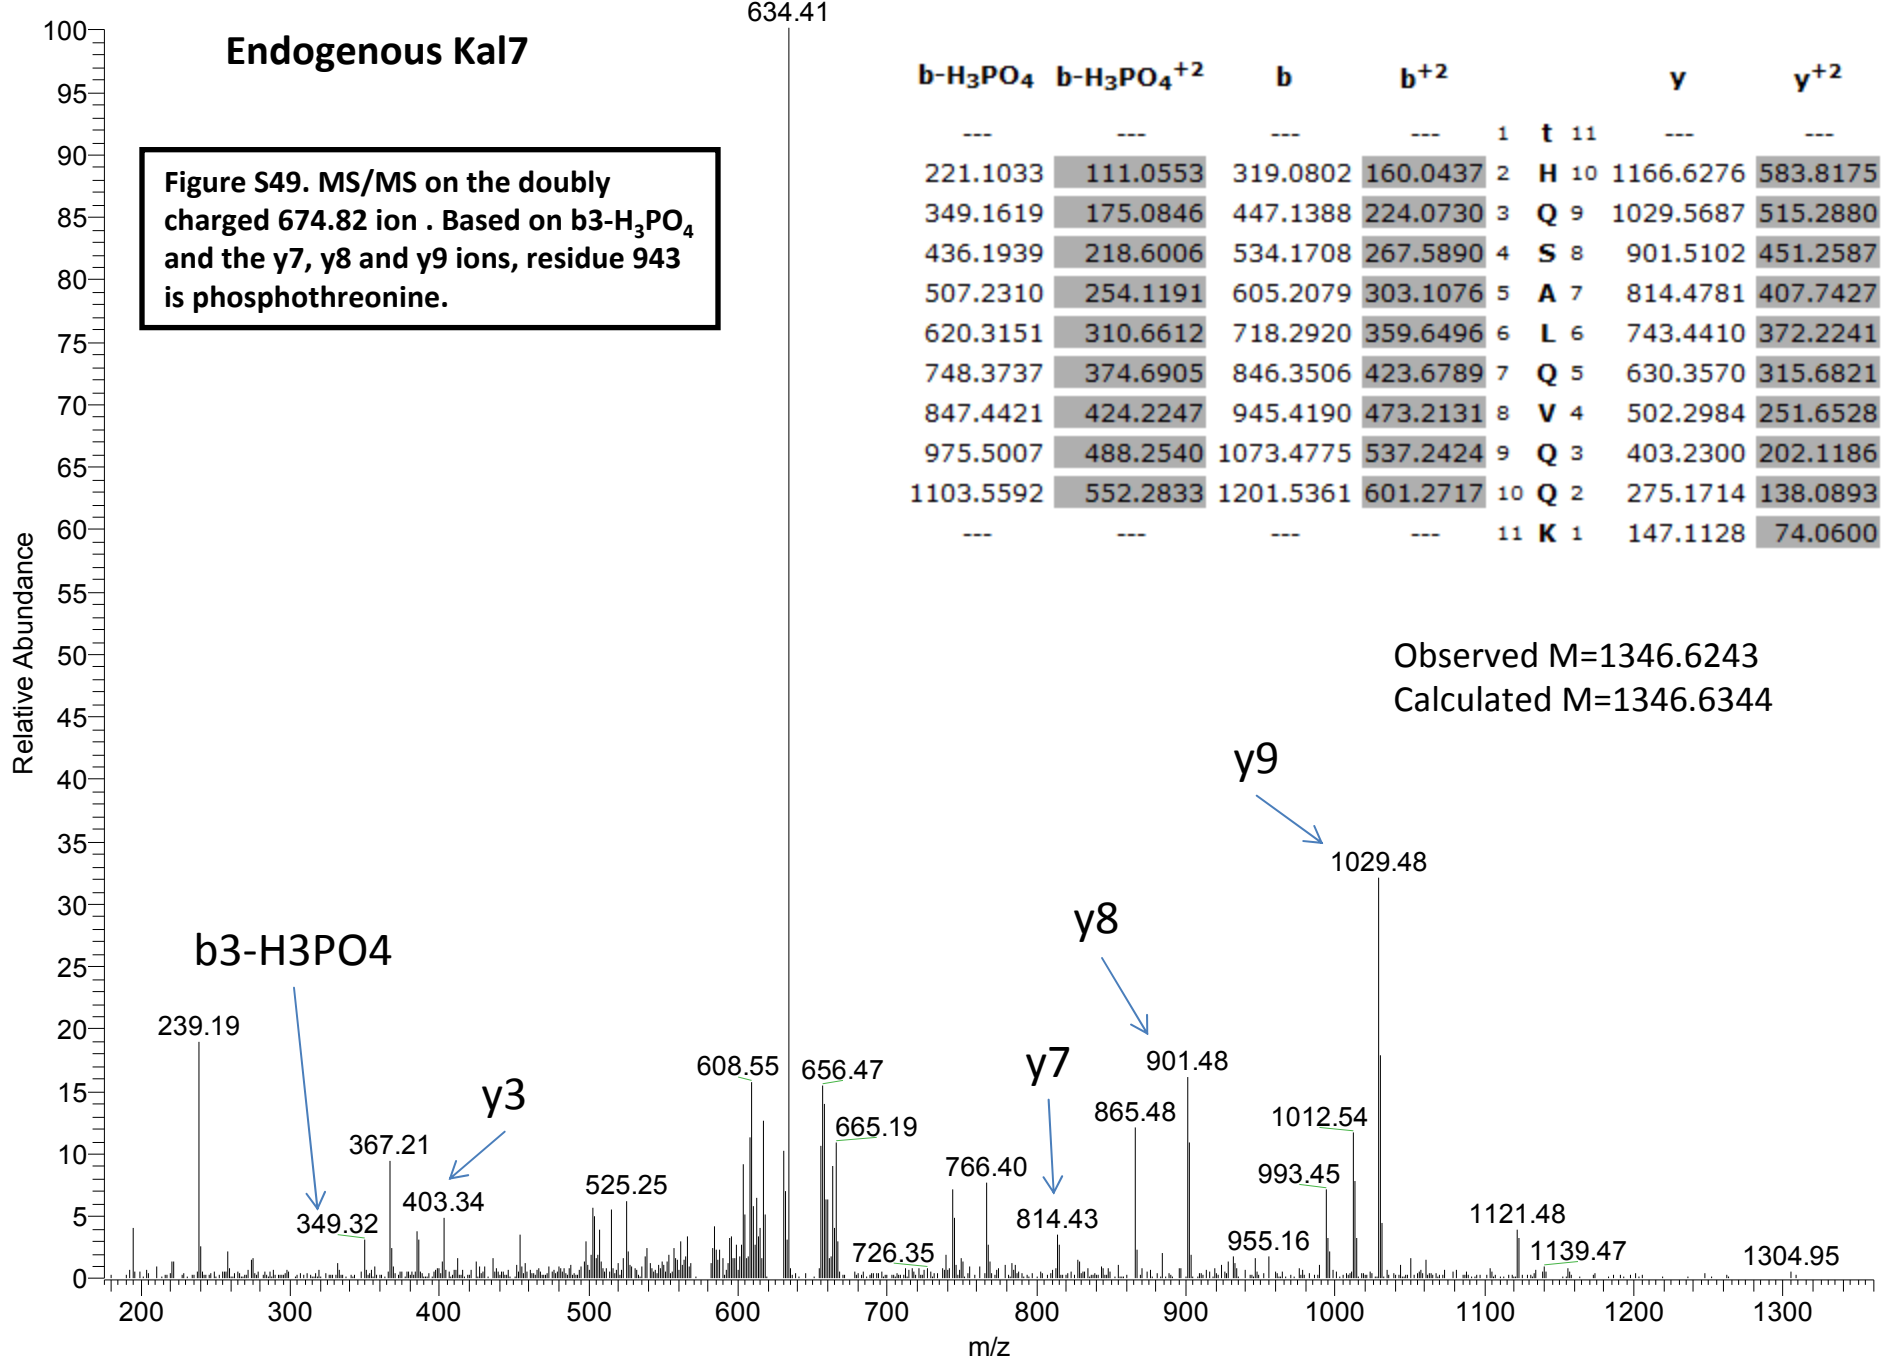

# Endogenous Kal7

OT09-1008 #2731 RT: 34.32 AV: 1 NL: 1.97E4  
 T: ITMS + c NSI d Full ms2 1177.52@cid35.00 [310.00-2000.00]

## MS/MS of Peptide K.AEALLQAGH**p**YDADAIRECAEK.V

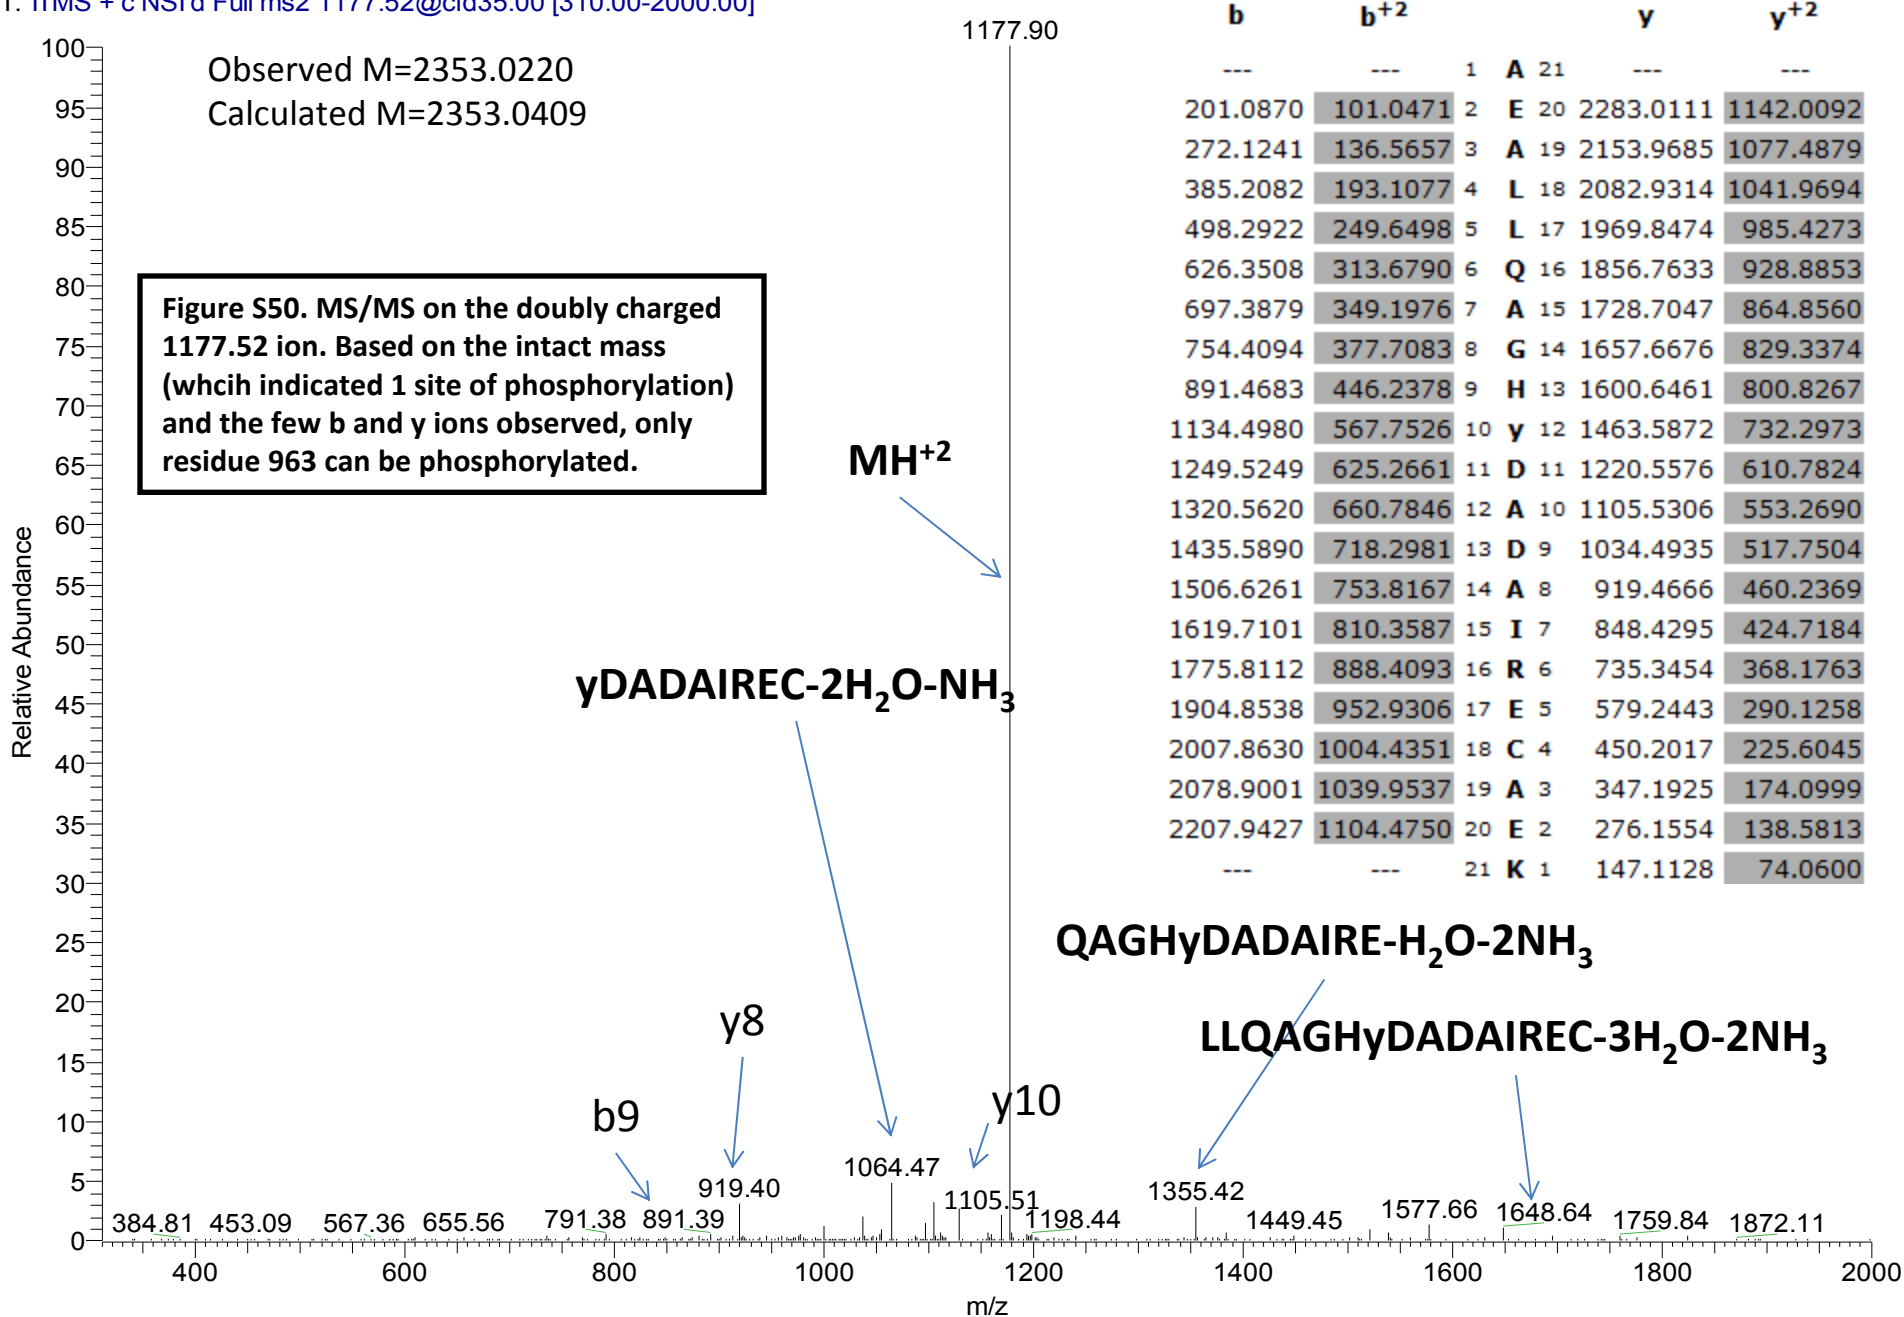

OT09-3353 #4271 RT: 51.78 AV: 1 NL: 1.53E3  
 T: ITMS + c NSI d Full ms2 1040.94@cid35.00 [275.00-2000.00]

### MS/MS of Peptide K.pTpSEQVCSVLESLEQEYR.R

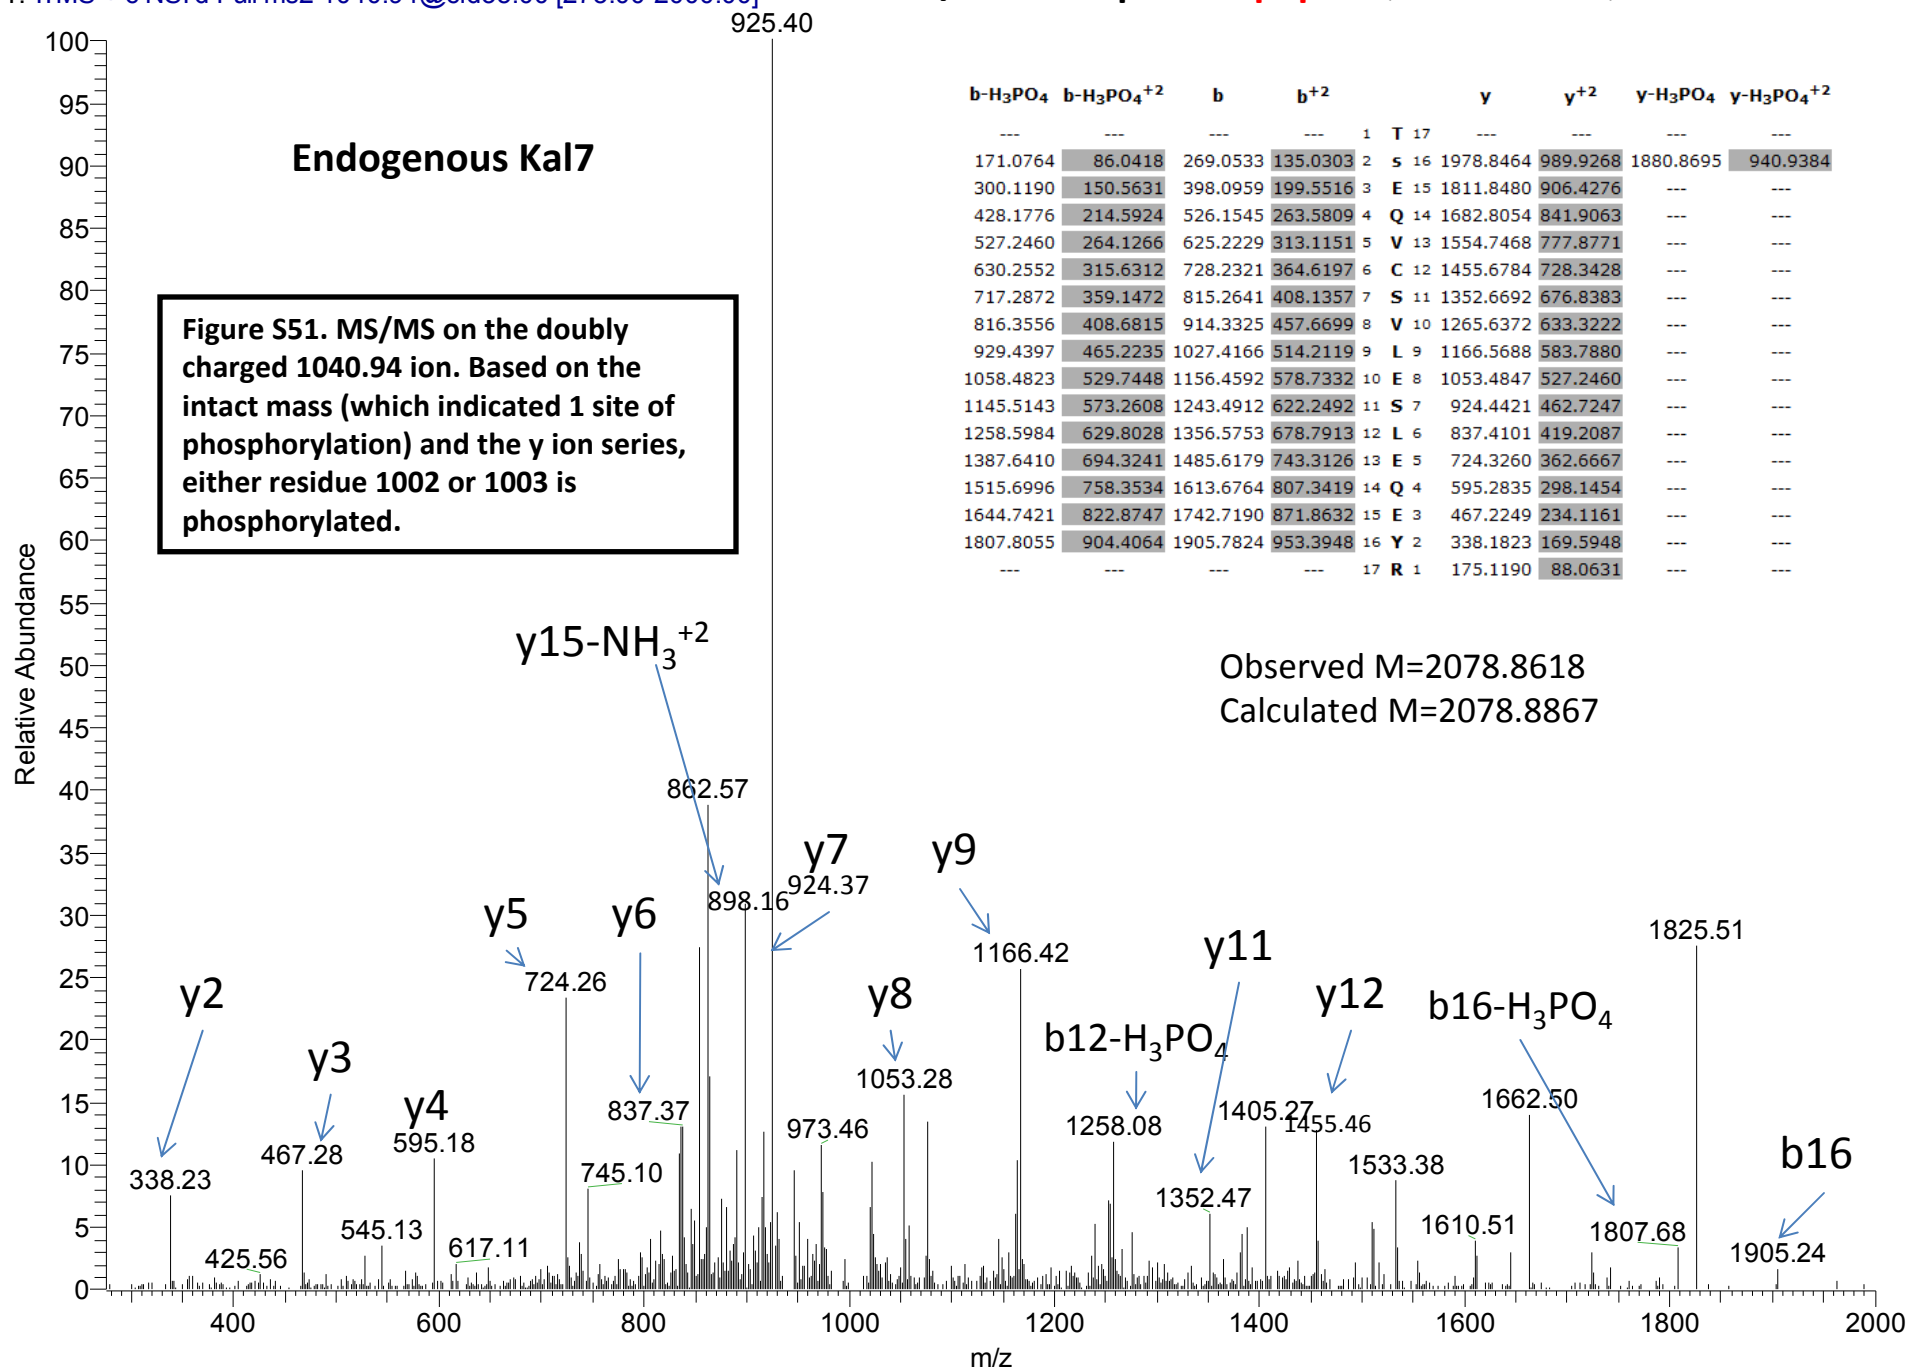

### MS/MS of Peptide R.NNVpSoxMPSVASHTR.G

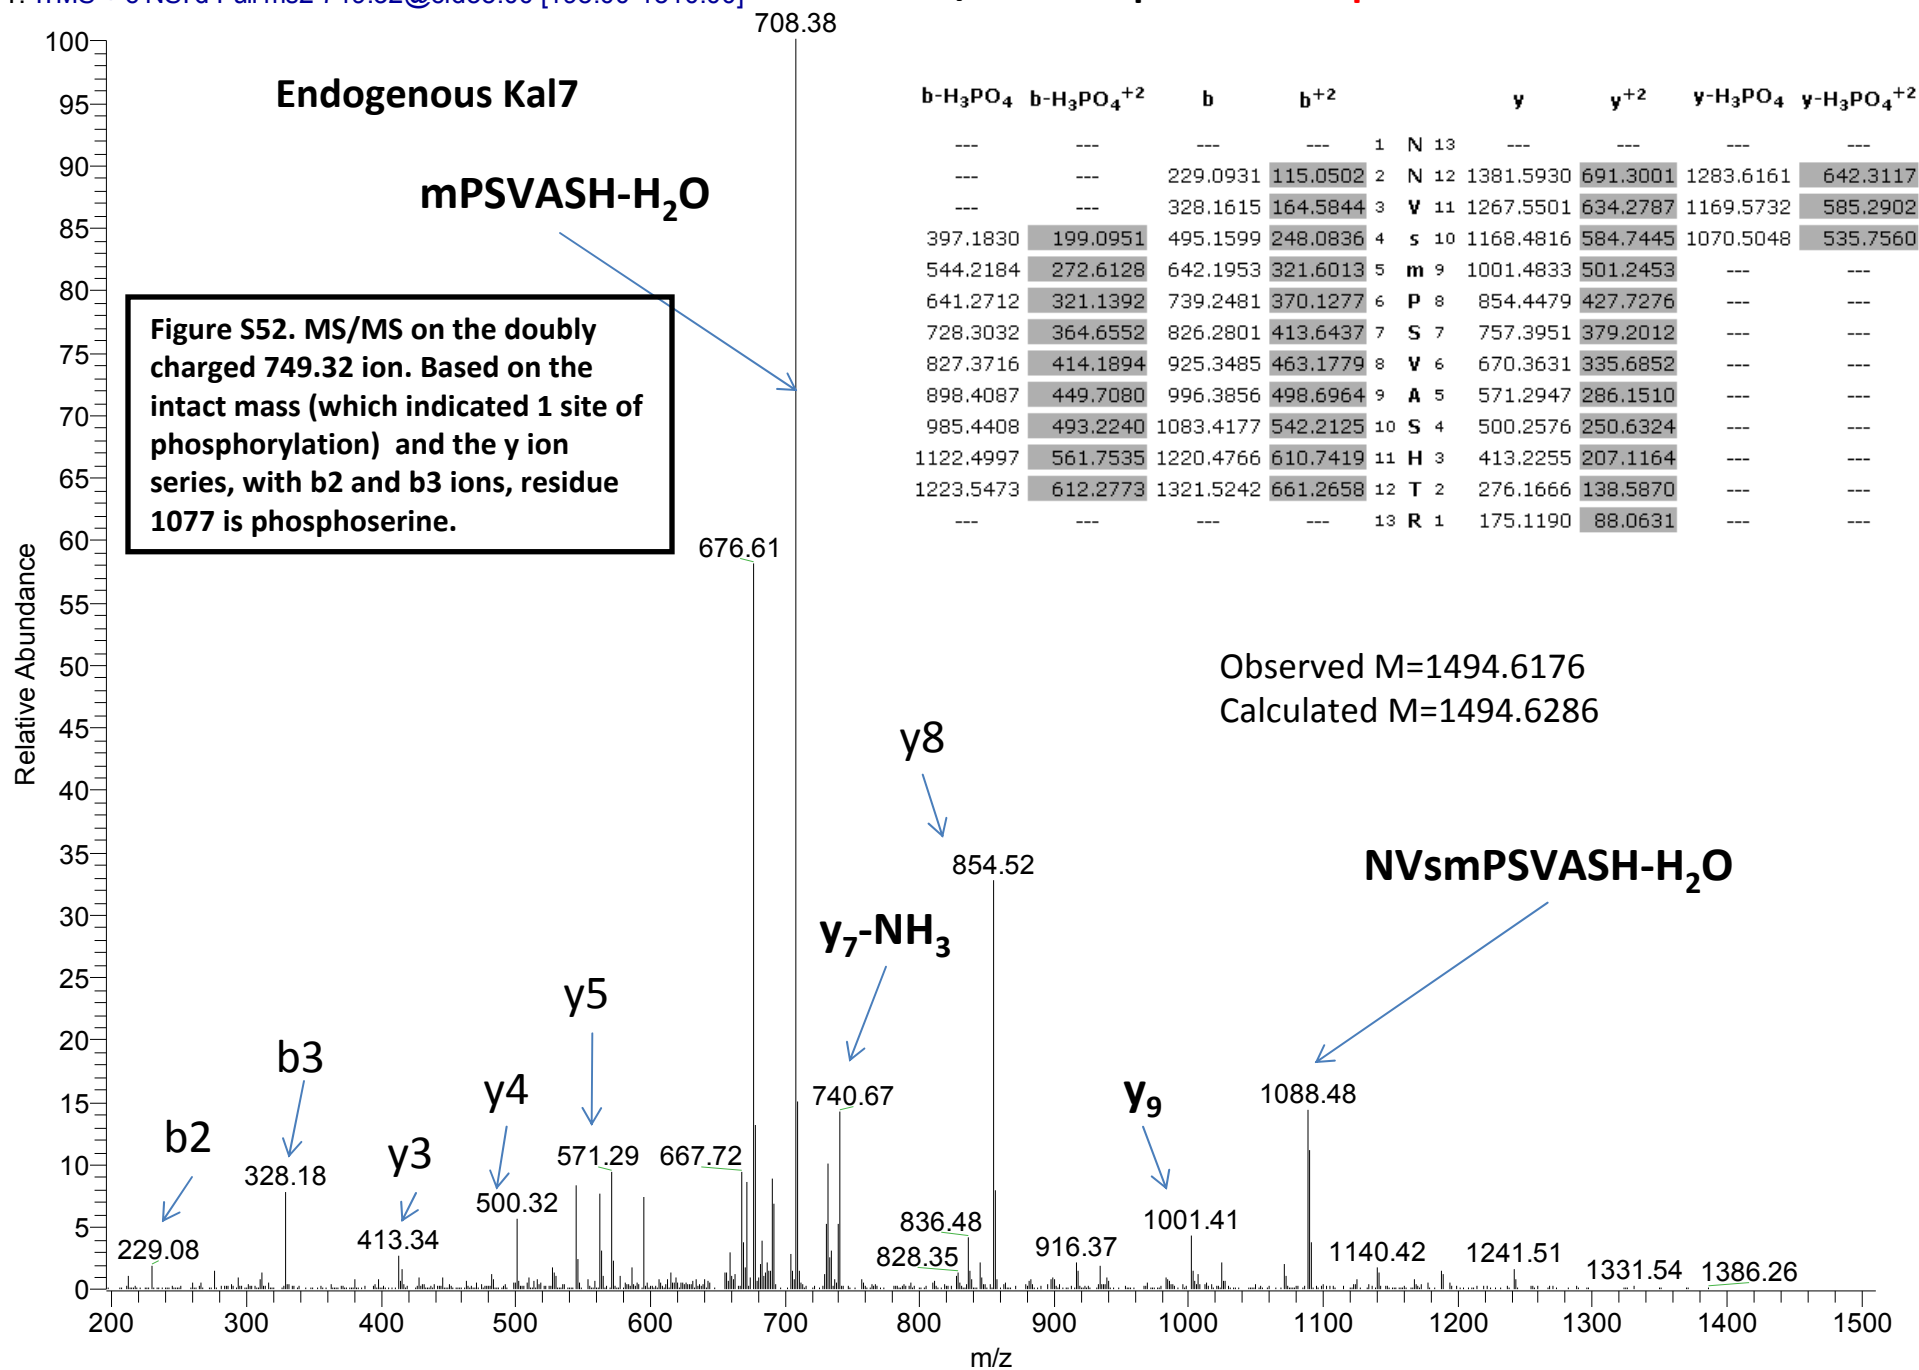

### MS/MS of Peptide R.NNVSoxMPSVASHpTR.G

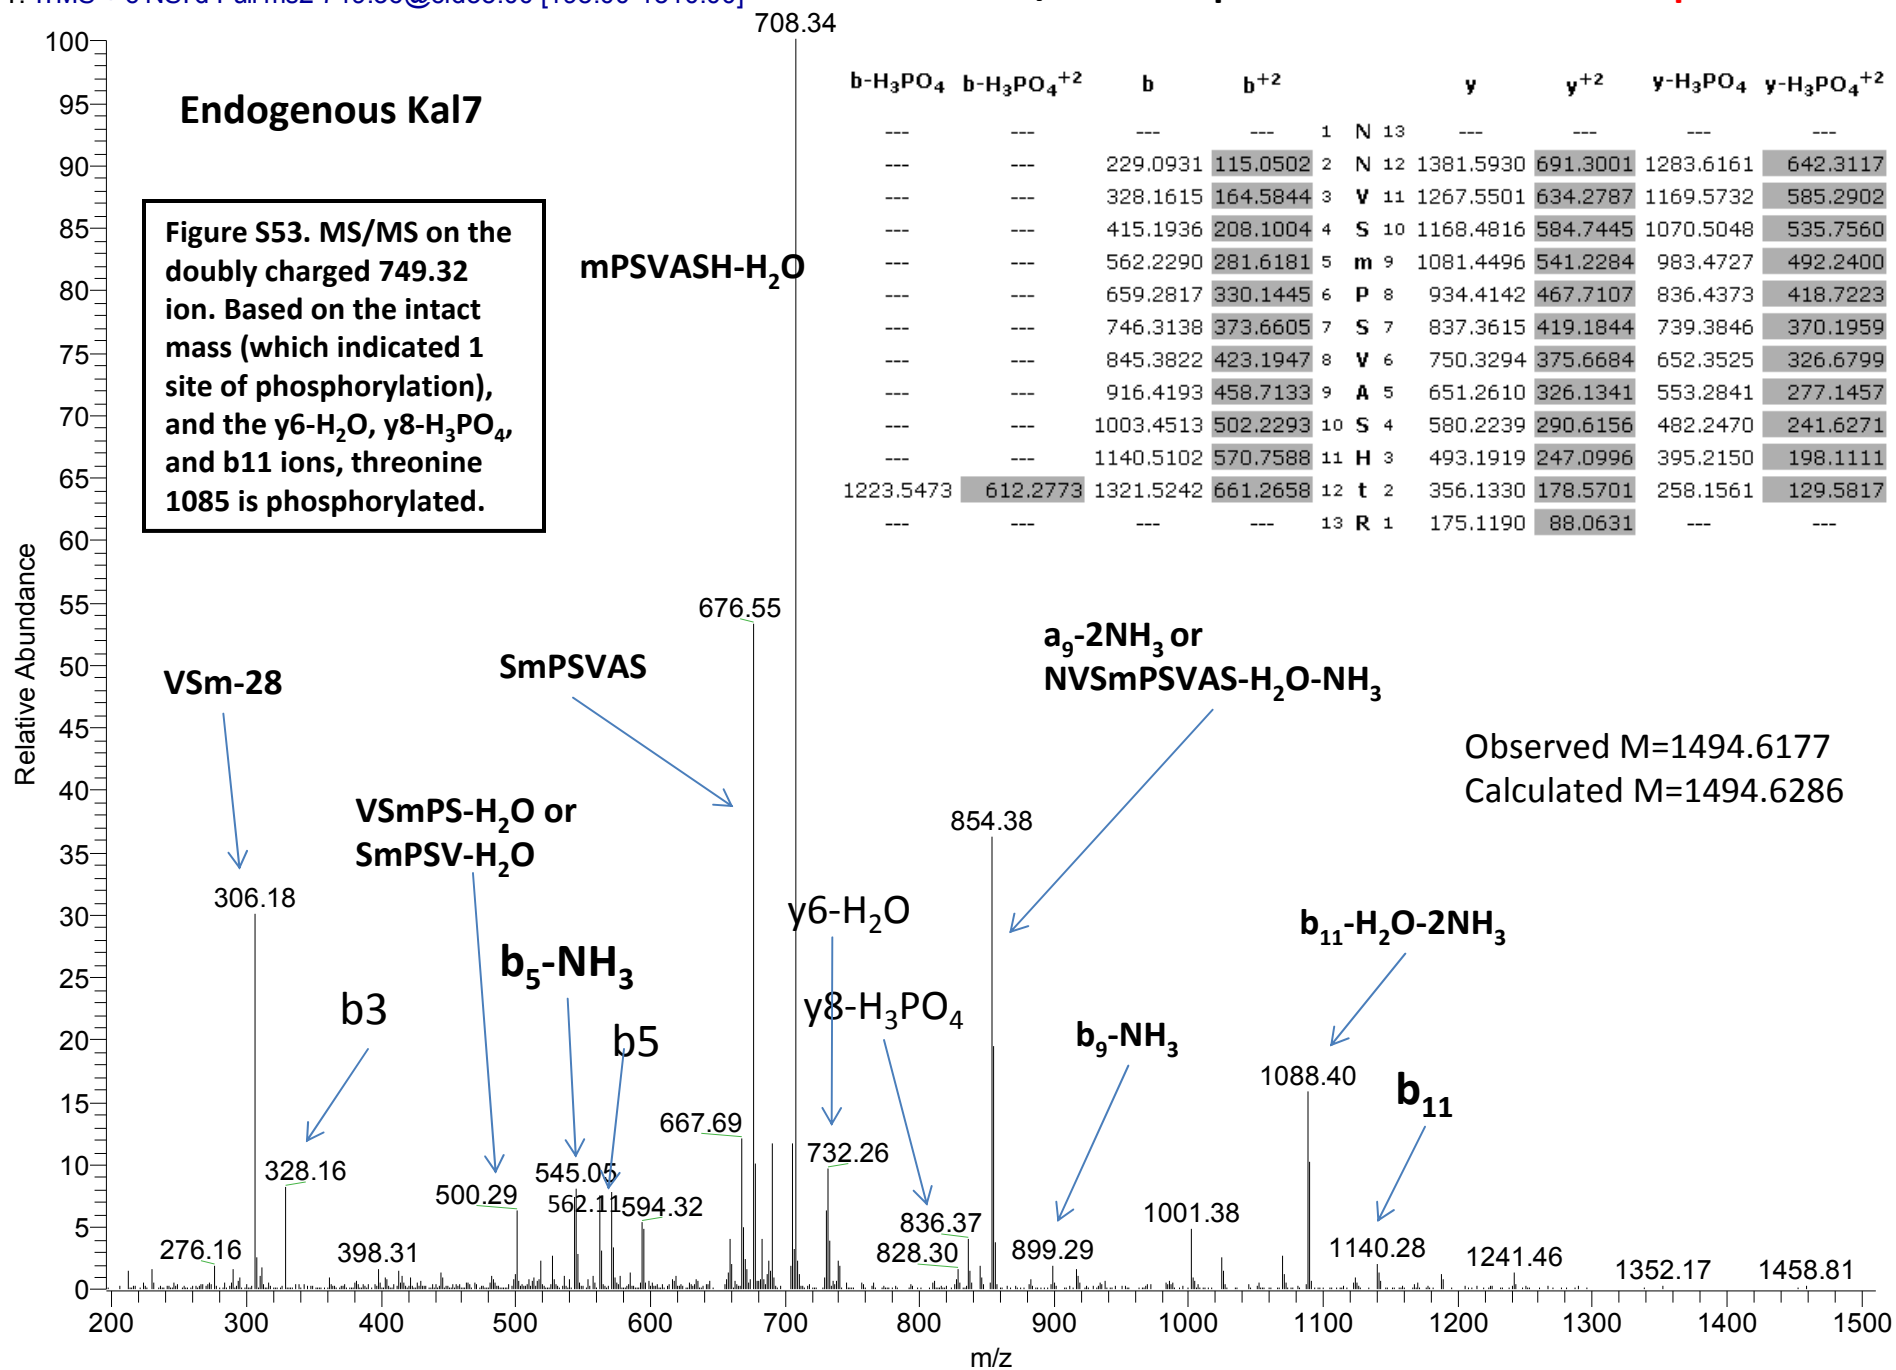

OT09-3336 #3359 RT: 47.56 AV: 1 NL: 2.45E2  
 T: ITMS + c NSI d Full ms2 562.29@cid35.00 [140.00-1135.00]

### MS/MS of peptide R.VLHFWpTLK.K

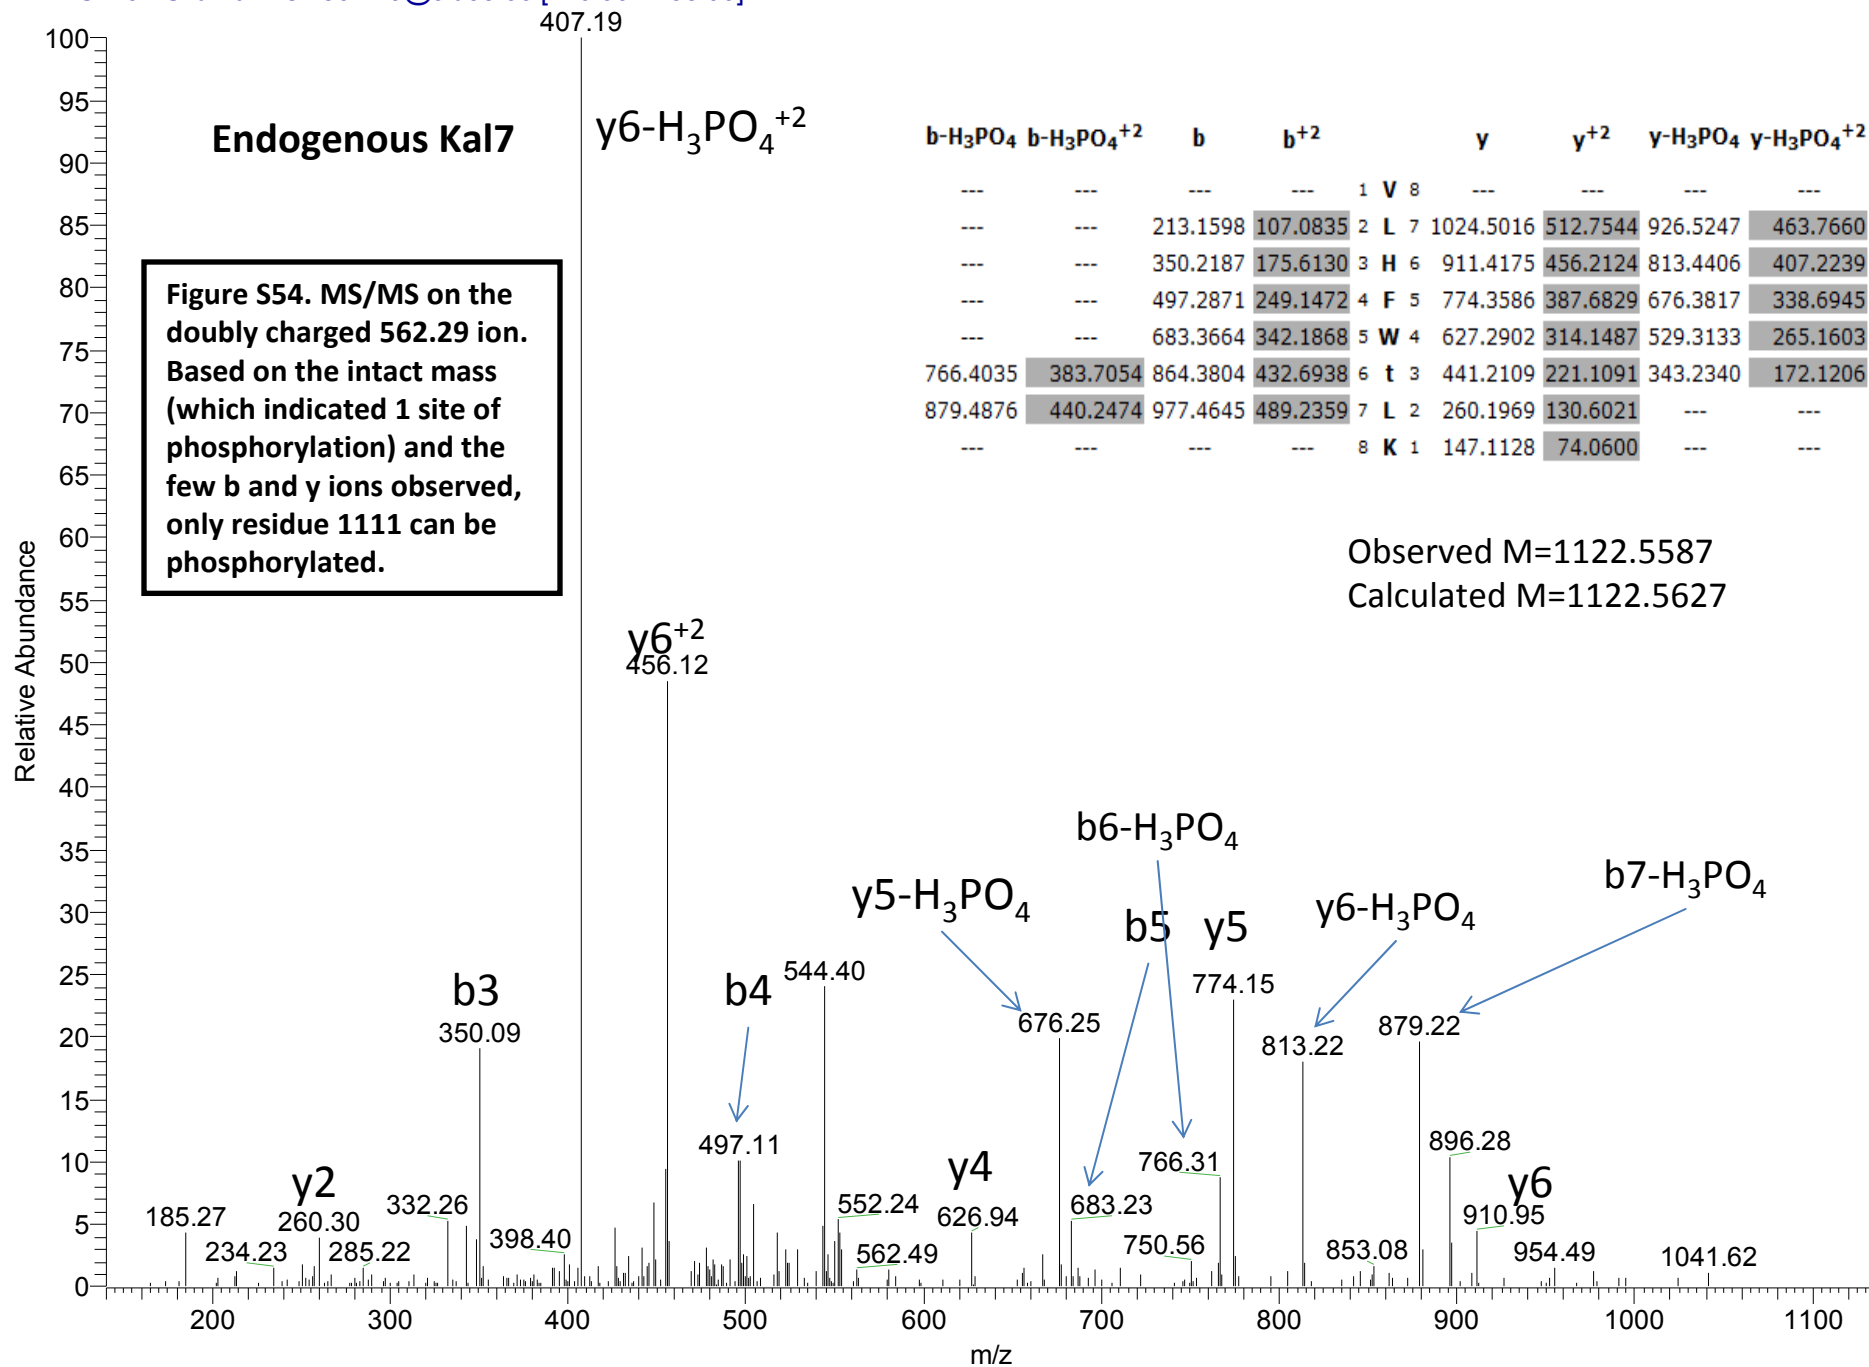

OT09-4228 #2284 RT: 31.38 AV: 1 NL: 2.76E3  
 T: ITMS + c NSI d Full ms2 557.26@cid35.00 [140.00-1125.00]

### MS/MS of peptide K.GHIHA<sub>p</sub>TEIR.K

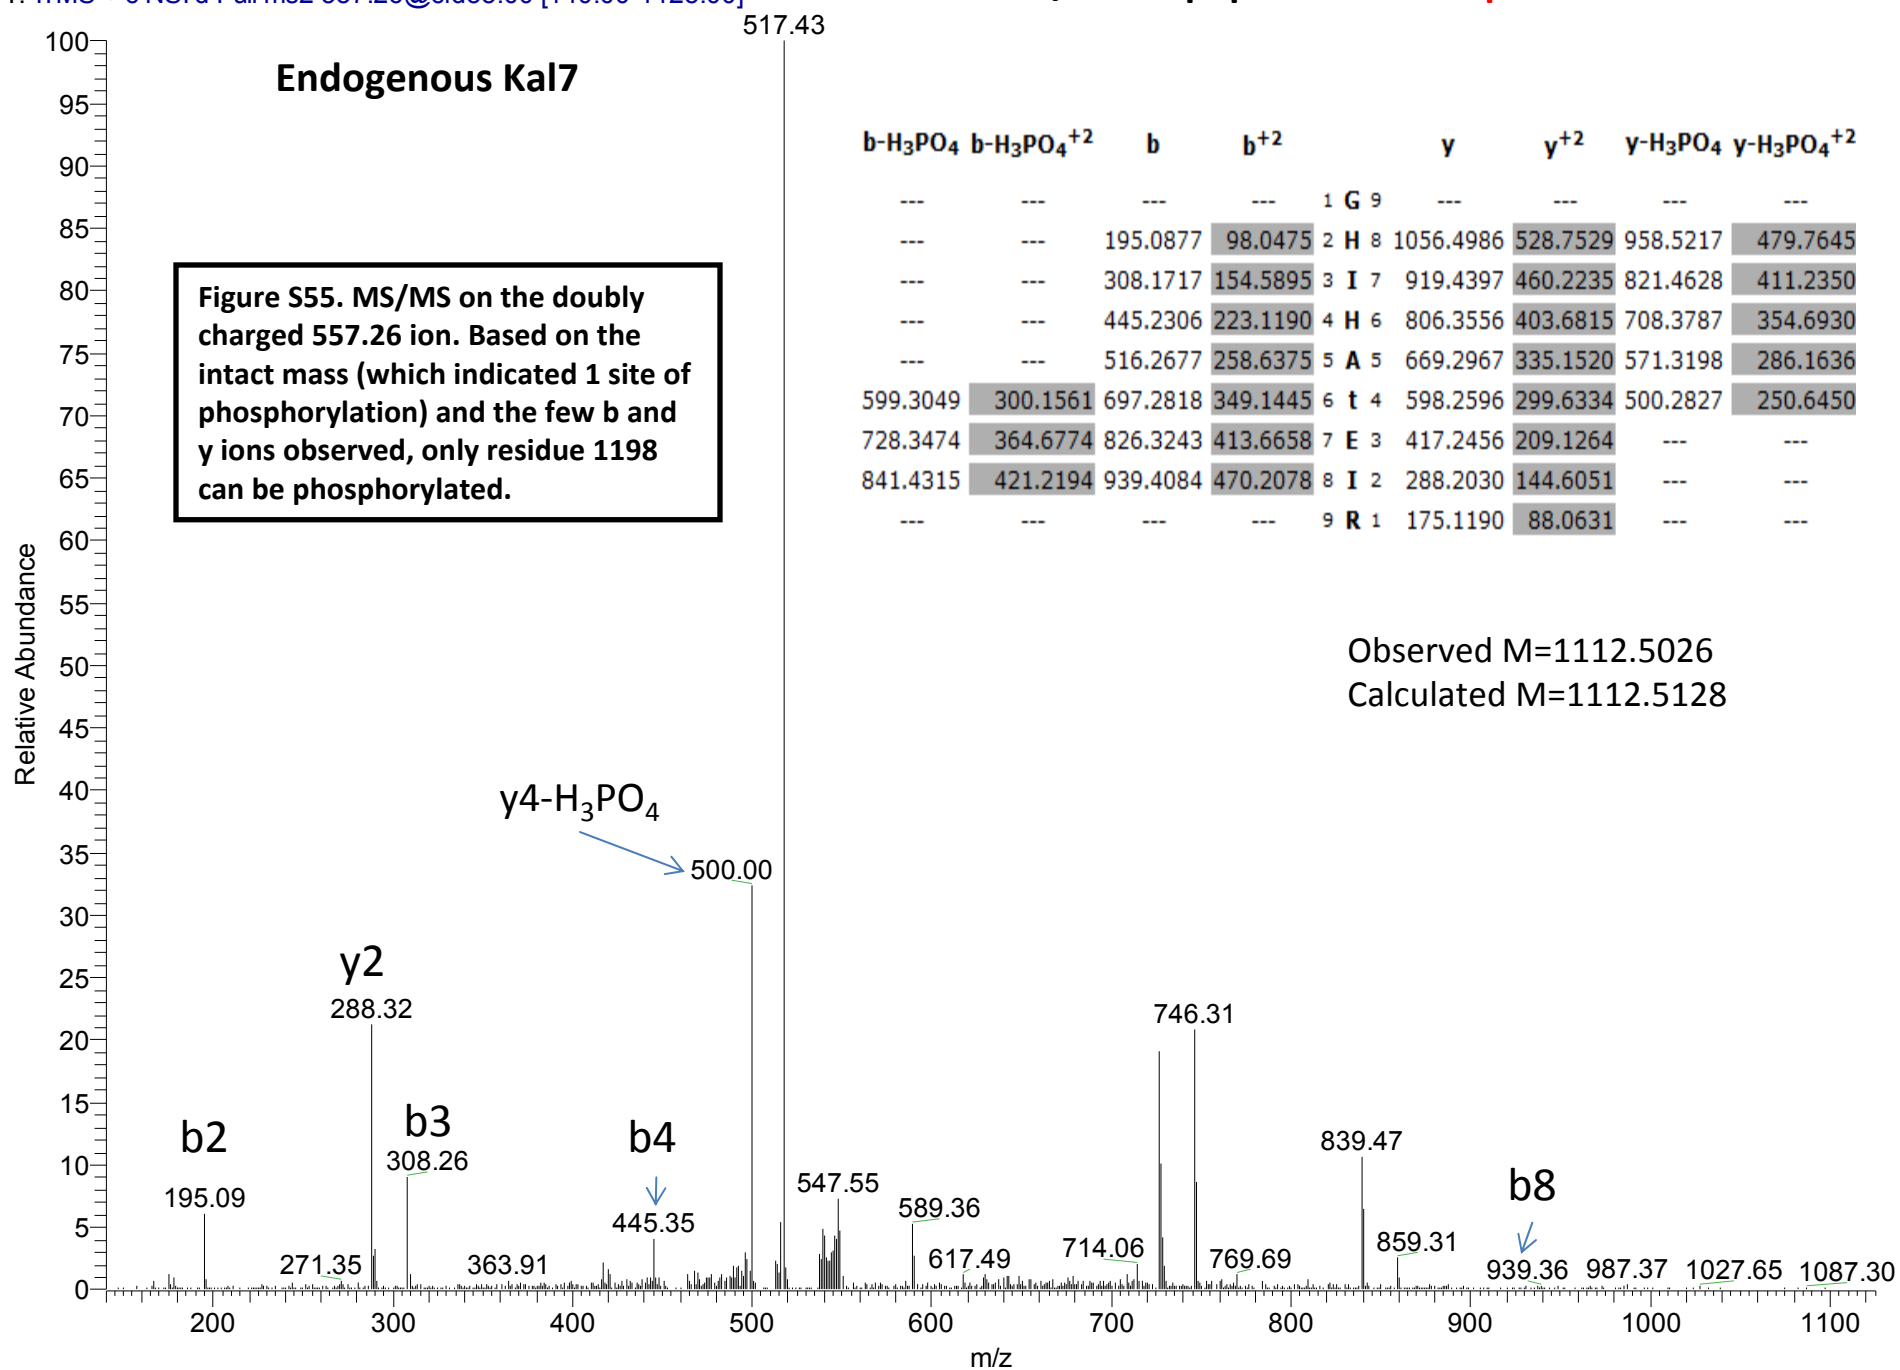

# MS/MS of peptide R.DFpSLR.M

## Endogenous Kal7

$\gamma_4\text{-H}_3\text{PO}_4$

Figure S56. MS/MS on the singly charged 717.29 ion. Based on the intact mass (which indicated 1 site of phosphorylation) and the few b and y ions observed, only residue 1215 can be phosphorylated.

| b-H <sub>3</sub> PO <sub>4</sub> | b-H <sub>3</sub> PO <sub>4</sub> <sup>+2</sup> | b        | b <sup>+2</sup> | y     | y <sup>+2</sup> | $\gamma\text{-H}_3\text{PO}_4$ | $\gamma\text{-H}_3\text{PO}_4^{+2}$ |
|----------------------------------|------------------------------------------------|----------|-----------------|-------|-----------------|--------------------------------|-------------------------------------|
| ---                              | ---                                            | ---      | ---             | 1 D 5 | ---             | ---                            | ---                                 |
| ---                              | ---                                            | 263.1026 | 132.0550        | 2 F 4 | 602.2698        | 301.6385                       | 504.2929                            |
| 332.1241                         | 166.5657                                       | 430.1010 | 215.5541        | 3 S 3 | 455.2014        | 228.1043                       | 357.2245                            |
| 445.2082                         | 223.1077                                       | 543.1851 | 272.0962        | 4 L 2 | 288.2030        | 144.6051                       | ---                                 |
| ---                              | ---                                            | ---      | ---             | 5 R 1 | 175.1190        | 88.0631                        | ---                                 |

Observed M=716.2846  
 Calculated M=716.2894

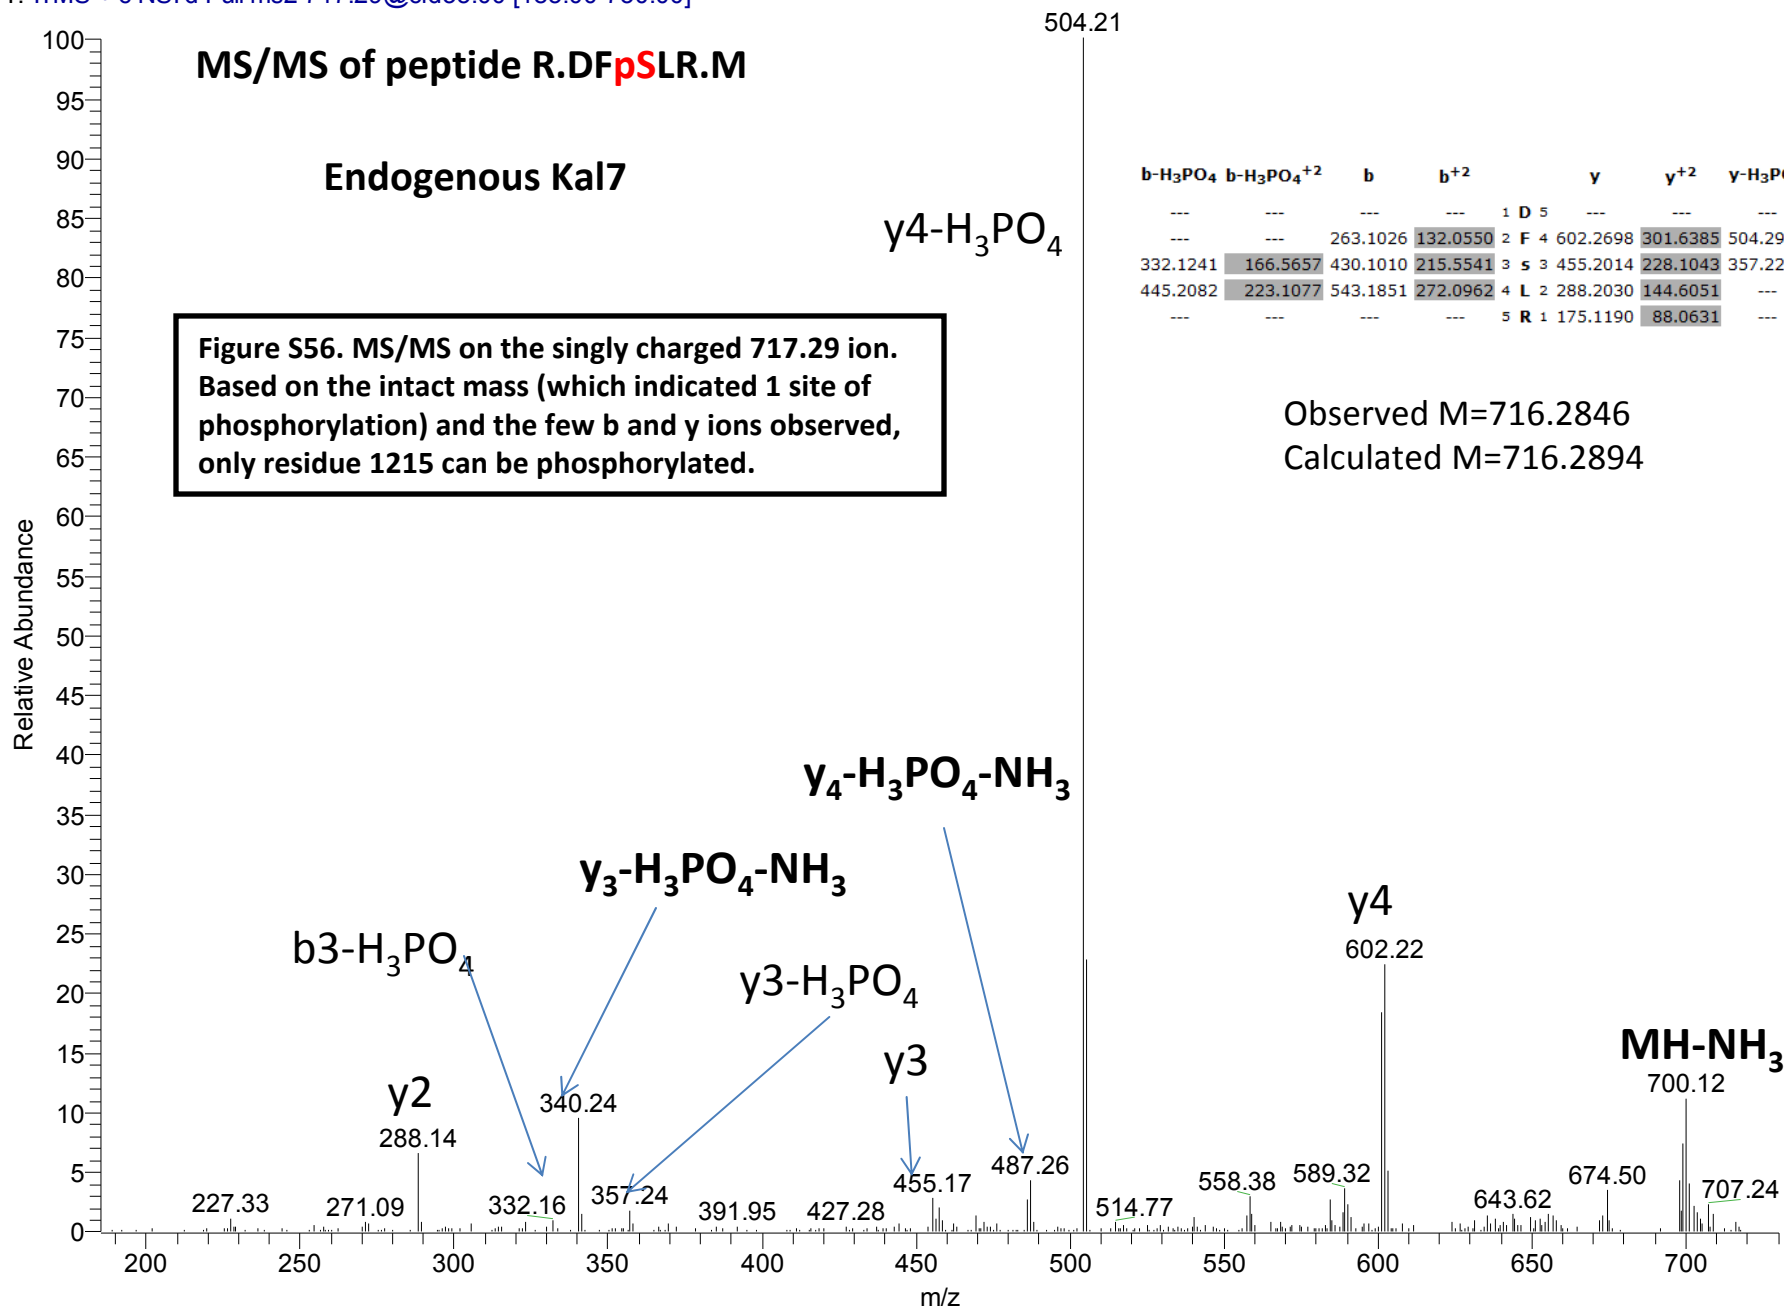



# Endogenous Kal7

## MS/MS of peptide LLpTSELGVTEHVEGDPCK

OT09-4229 #3454 RT: 41.38 AV: 1 NL: 4.61E3

T: ITMS + c NSI d Full ms2 1004.46@cid35.00 [265.00-2000.00]

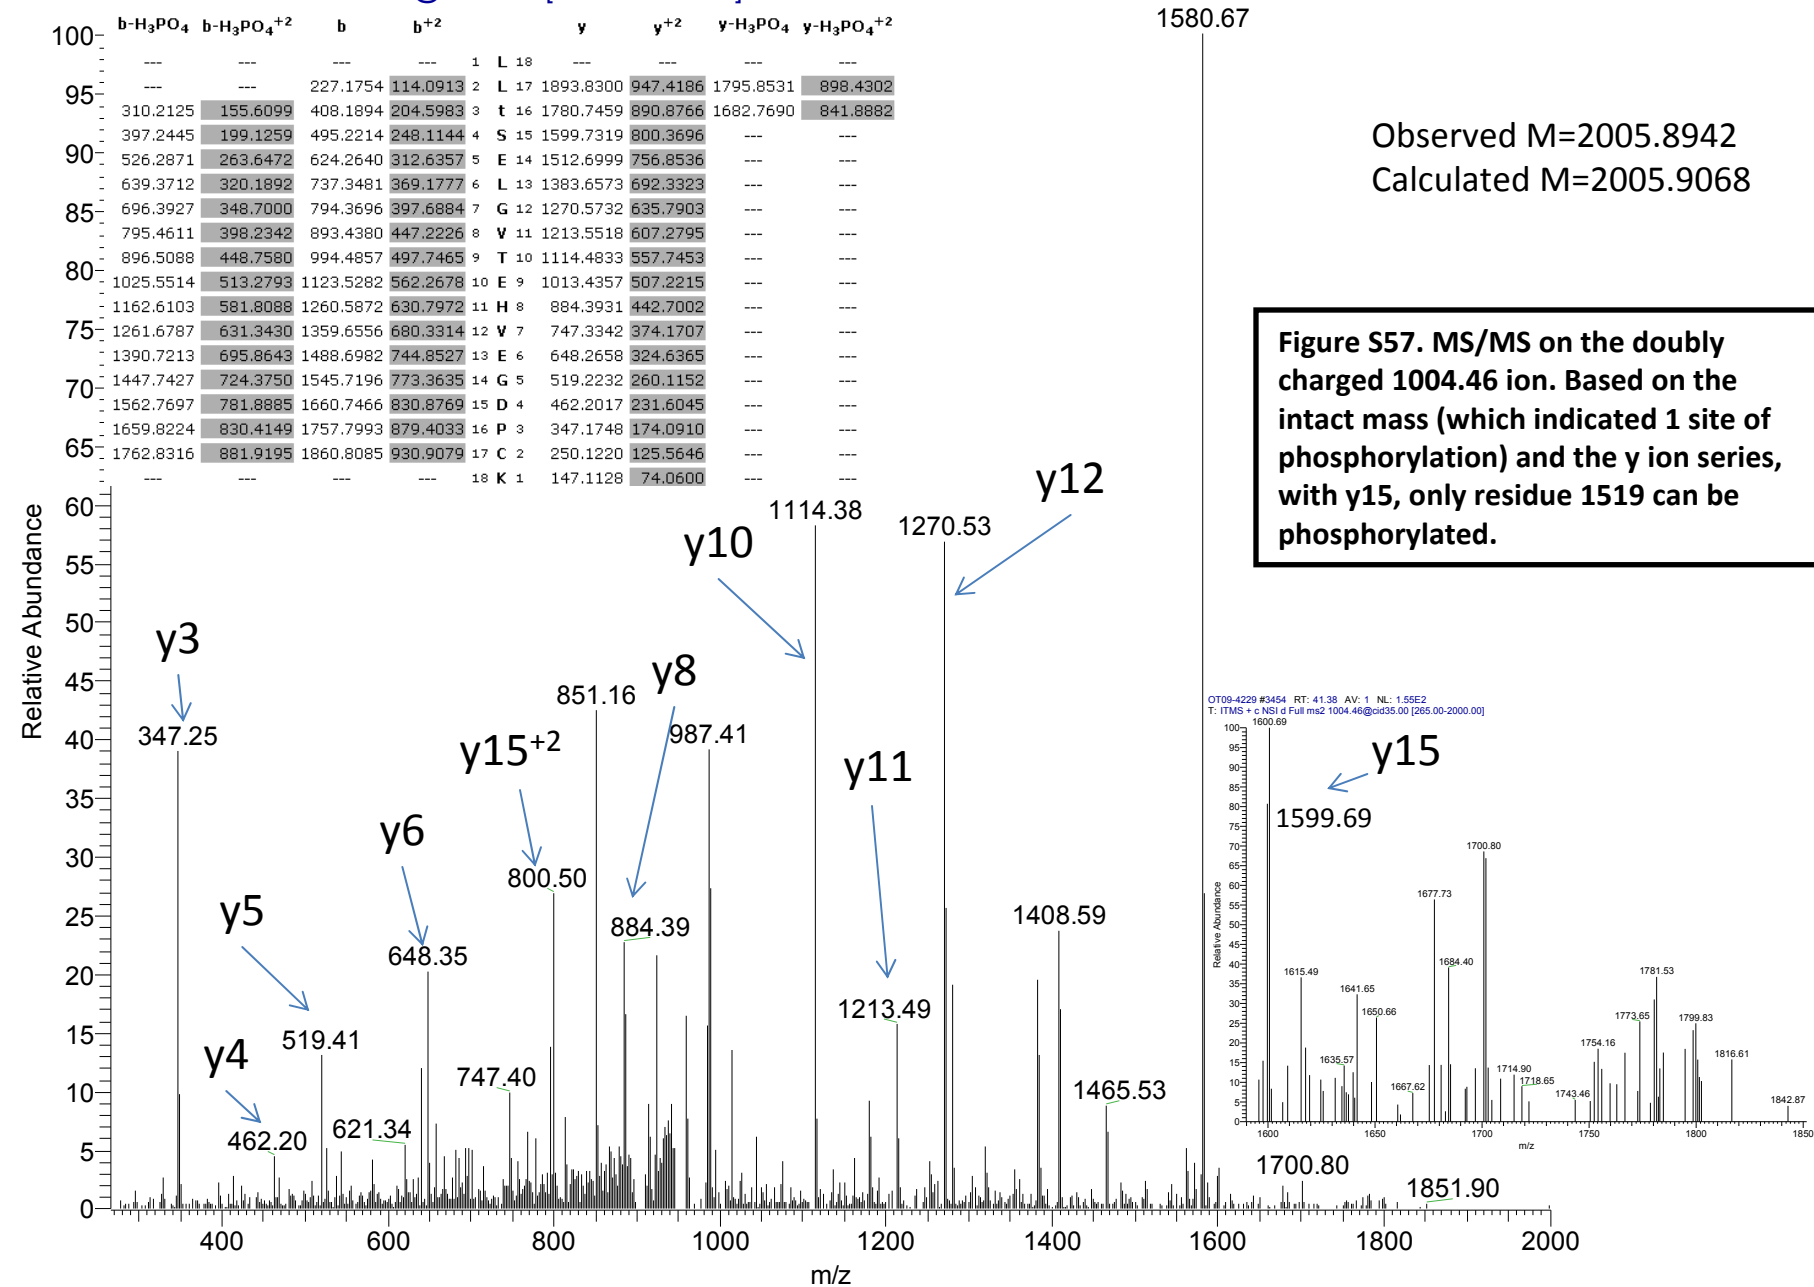

Observed M=2005.8942  
Calculated M=2005.9068

Figure S57. MS/MS on the doubly charged 1004.46 ion. Based on the intact mass (which indicated 1 site of phosphorylation) and the y ion series, with y15, only residue 1519 can be phosphorylated.

# Endogenous Kal7

# MS/MS of peptide LLT<sup>p</sup>SELGVTEHVEGD<sup>p</sup>PCK

OT09-3352 #2895 RT: 41.33 AV: 1 NL: 2.11E2  
 T: ITMS + c NSI d Full ms2 1004.45@cid35.00 [265.00-2000.00]

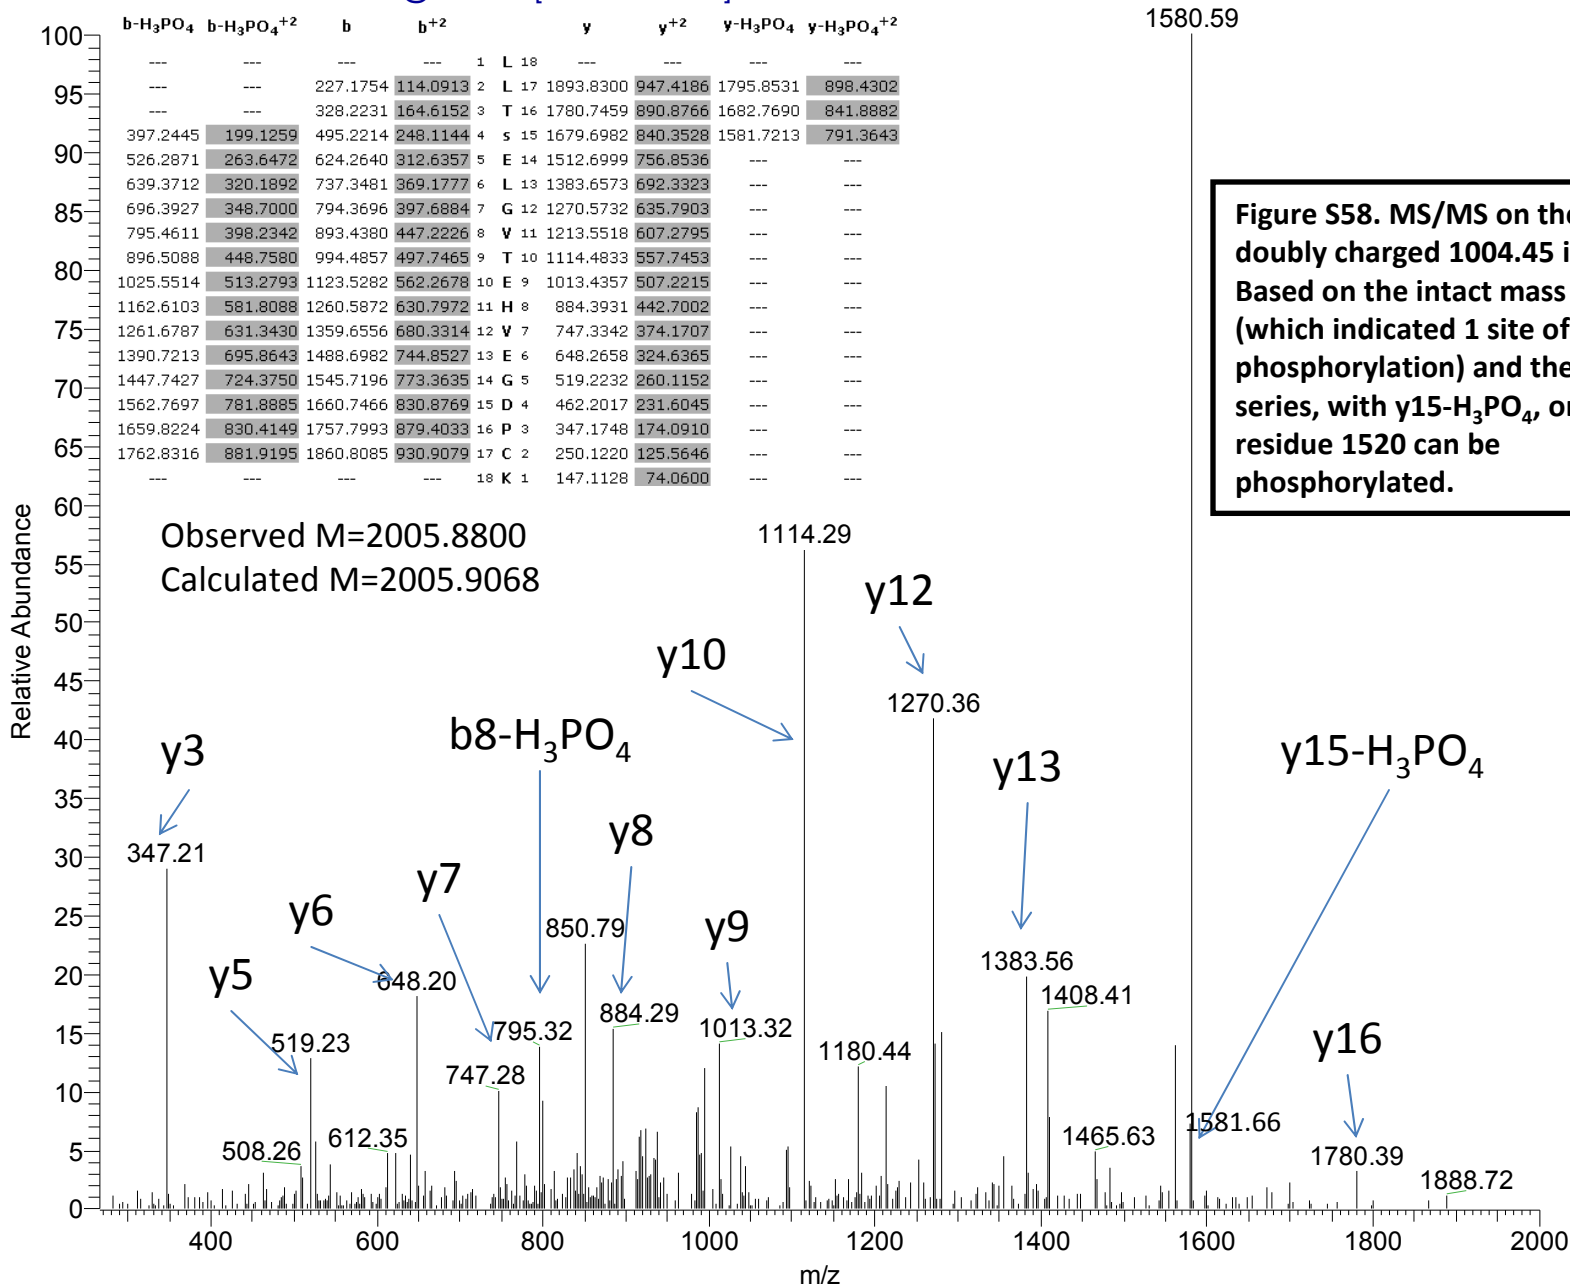

# Endogenous Kal7

# MS/MS of peptide RDGVEDGDpSQGDGSSQPDTISIASR

OT09-0956 #2262 RT: 30.95 AV: 1 NL: 1.11E3  
 T: ITMS + c NSI d Full ms2 877.71@cid35.00 [230.00-2000.00]

|  | b-H <sub>3</sub> PO <sub>4</sub> | b-H <sub>3</sub> PO <sub>4</sub> +2 | b         | b+2       |    | y    | y+2       | y-H <sub>3</sub> PO <sub>4</sub> | y-H <sub>3</sub> PO <sub>4</sub> +2 |           |
|--|----------------------------------|-------------------------------------|-----------|-----------|----|------|-----------|----------------------------------|-------------------------------------|-----------|
|  | ---                              | ---                                 | ---       | ---       | 1  | R 25 | ---       | ---                              | ---                                 |           |
|  | ---                              | ---                                 | 272.1353  | 136.5713  | 2  | D 24 | 2472.9998 | 1237.0036                        | 2375.0229                           | 1188.0151 |
|  | ---                              | ---                                 | 329.1568  | 165.0820  | 3  | G 23 | 2357.9729 | 1179.4901                        | 2259.9960                           | 1130.5016 |
|  | ---                              | ---                                 | 428.2252  | 214.6162  | 4  | V 22 | 2300.9514 | 1150.9794                        | 2202.9745                           | 1101.9909 |
|  | ---                              | ---                                 | 557.2678  | 279.1375  | 5  | E 21 | 2201.8830 | 1101.4451                        | 2103.9061                           | 1052.4567 |
|  | ---                              | ---                                 | 672.2947  | 336.6510  | 6  | D 20 | 2072.8404 | 1036.9239                        | 1974.8635                           | 987.9354  |
|  | ---                              | ---                                 | 729.3162  | 365.1617  | 7  | G 19 | 1957.8135 | 979.4104                         | 1859.8366                           | 930.4219  |
|  | ---                              | ---                                 | 844.3432  | 422.6752  | 8  | D 18 | 1900.7920 | 950.8996                         | 1802.8151                           | 901.9112  |
|  | 913.3646                         | 457.1859                            | 1011.3415 | 506.1744  | 9  | s 17 | 1785.7651 | 893.3862                         | 1687.7882                           | 844.3977  |
|  | 1041.4232                        | 521.2152                            | 1139.4001 | 570.2037  | 10 | Q 16 | 1618.7667 | 809.8870                         | ---                                 | ---       |
|  | 1098.4447                        | 549.7260                            | 1196.4216 | 598.7144  | 11 | G 15 | 1490.7081 | 745.8577                         | ---                                 | ---       |
|  | 1213.4716                        | 607.2394                            | 1311.4485 | 656.2279  | 12 | D 14 | 1433.6867 | 717.3470                         | ---                                 | ---       |
|  | 1270.4931                        | 635.7502                            | 1368.4700 | 684.7386  | 13 | G 13 | 1318.6597 | 659.8335                         | ---                                 | ---       |
|  | 1357.5251                        | 679.2662                            | 1455.5020 | 728.2546  | 14 | S 12 | 1261.6383 | 631.3228                         | ---                                 | ---       |
|  | 1444.5571                        | 722.7822                            | 1542.5340 | 771.7706  | 15 | S 11 | 1174.6062 | 587.8068                         | ---                                 | ---       |
|  | 1572.6157                        | 786.8115                            | 1670.5926 | 835.7999  | 16 | Q 10 | 1087.5742 | 544.2907                         | ---                                 | ---       |
|  | 1669.6685                        | 835.3379                            | 1767.6454 | 884.3263  | 17 | P 9  | 959.5156  | 480.2615                         | ---                                 | ---       |
|  | 1784.6954                        | 892.8513                            | 1882.6723 | 941.8398  | 18 | D 8  | 862.4629  | 431.7351                         | ---                                 | ---       |
|  | 1885.7431                        | 943.3752                            | 1983.7200 | 992.3636  | 19 | T 7  | 747.4359  | 374.2216                         | ---                                 | ---       |
|  | 1998.8271                        | 999.9172                            | 2096.8040 | 1048.9057 | 20 | I 6  | 646.3883  | 323.6978                         | ---                                 | ---       |
|  | 2085.8592                        | 1043.4332                           | 2183.8361 | 1092.4217 | 21 | S 5  | 533.3042  | 267.1557                         | ---                                 | ---       |
|  | 2198.9432                        | 1099.9753                           | 2296.9201 | 1148.9637 | 22 | I 4  | 446.2722  | 223.6397                         | ---                                 | ---       |
|  | 2269.9804                        | 1135.4938                           | 2367.9572 | 1184.4823 | 23 | A 3  | 333.1881  | 167.0977                         | ---                                 | ---       |
|  | 2357.0124                        | 1179.0098                           | 2454.9893 | 1227.9983 | 24 | S 2  | 262.1510  | 131.5791                         | ---                                 | ---       |
|  | ---                              | ---                                 | ---       | ---       | 25 | R 1  | 175.1190  | 88.0631                          | ---                                 | ---       |

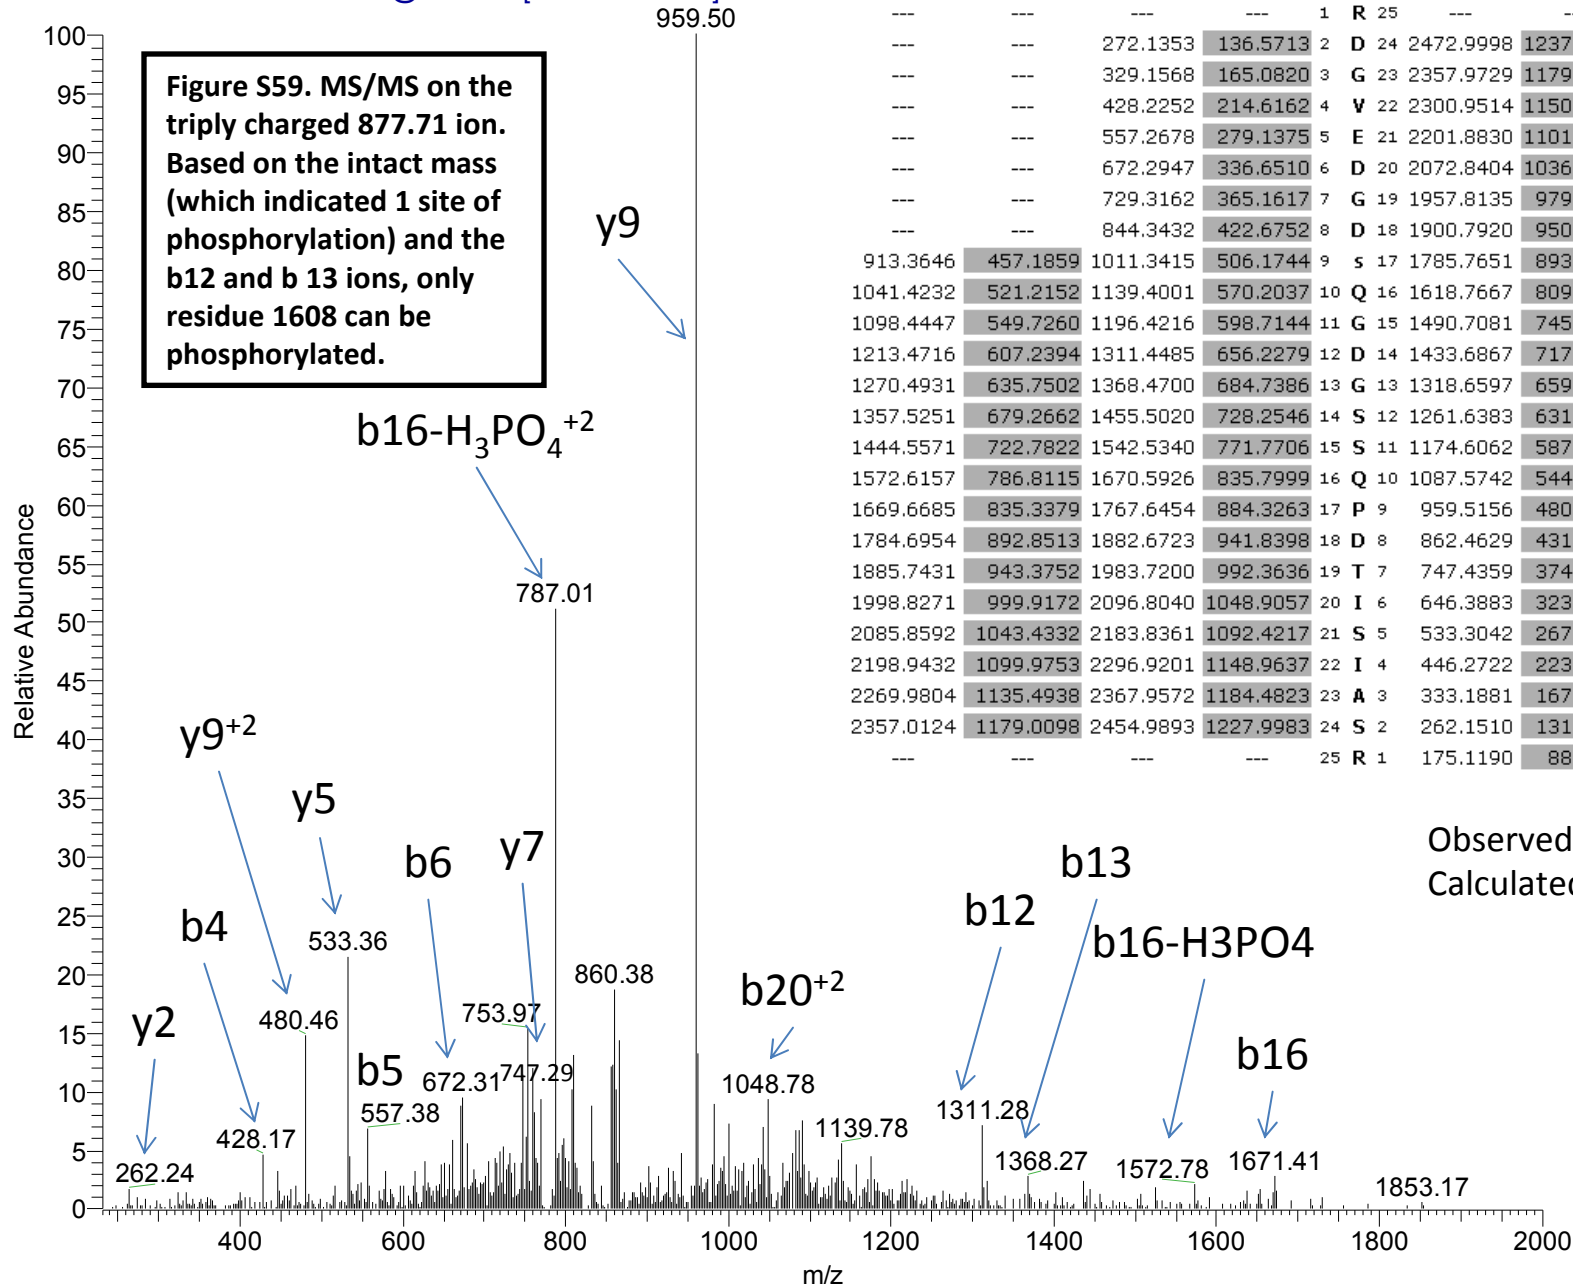

Observed M=2628.0927  
 Calculated M=2628.0937

# Endogenous Kal7

# MS/MS of peptide DGVEDGDSQGDGpSSQPDTISIASR

OT09-4224 #2878 RT: 39.33 AV: 1 NL: 1.32E2  
 T: ITMS + c NSI d Full ms2 825.34@cid35.00 [215.00-2000.00]

|  | b-H <sub>3</sub> PO <sub>4</sub> | b-H <sub>3</sub> PO <sub>4</sub> <sup>+2</sup> | b         | b <sup>+2</sup> |    | y    | y <sup>+2</sup> | y-H <sub>3</sub> PO <sub>4</sub> | y-H <sub>3</sub> PO <sub>4</sub> <sup>+2</sup> |           |
|--|----------------------------------|------------------------------------------------|-----------|-----------------|----|------|-----------------|----------------------------------|------------------------------------------------|-----------|
|  | ---                              | ---                                            | ---       | ---             | 1  | D 24 | ---             | ---                              | ---                                            |           |
|  | ---                              | ---                                            | 173.0557  | 87.0315         | 2  | G 23 | 2357.9729       | 1179.4901                        | 2259.9960                                      | 1130.5016 |
|  | ---                              | ---                                            | 272.1241  | 136.5657        | 3  | V 22 | 2300.9514       | 1150.9794                        | 2202.9745                                      | 1101.9909 |
|  | ---                              | ---                                            | 401.1667  | 201.0870        | 4  | E 21 | 2201.8830       | 1101.4451                        | 2103.9061                                      | 1052.4567 |
|  | ---                              | ---                                            | 516.1936  | 258.6005        | 5  | D 20 | 2072.8404       | 1036.9239                        | 1974.8635                                      | 987.9354  |
|  | ---                              | ---                                            | 573.2151  | 287.1112        | 6  | G 19 | 1957.8135       | 979.4104                         | 1859.8366                                      | 930.4219  |
|  | ---                              | ---                                            | 688.2420  | 344.6247        | 7  | D 18 | 1900.7920       | 950.8996                         | 1802.8151                                      | 901.9112  |
|  | ---                              | ---                                            | 775.2741  | 388.1407        | 8  | S 17 | 1785.7651       | 893.3862                         | 1687.7882                                      | 844.3977  |
|  | ---                              | ---                                            | 903.3326  | 452.1700        | 9  | Q 16 | 1698.7330       | 849.8702                         | 1600.7562                                      | 800.8817  |
|  | ---                              | ---                                            | 960.3541  | 480.6807        | 10 | G 15 | 1570.6745       | 785.8409                         | 1472.6976                                      | 736.8524  |
|  | ---                              | ---                                            | 1075.3811 | 538.1942        | 11 | D 14 | 1513.6530       | 757.3301                         | 1415.6761                                      | 708.3417  |
|  | ---                              | ---                                            | 1132.4025 | 566.7049        | 12 | G 13 | 1398.6261       | 699.8167                         | 1300.6492                                      | 650.8282  |
|  | 1201.4240                        | 601.2156                                       | 1299.4009 | 650.2041        | 13 | S 12 | 1341.6046       | 671.3059                         | 1243.6277                                      | 622.3175  |
|  | 1288.4560                        | 644.7316                                       | 1386.4329 | 693.7201        | 14 | S 11 | 1174.6062       | 587.8068                         | ---                                            | ---       |
|  | 1416.5146                        | 708.7609                                       | 1514.4915 | 757.7494        | 15 | Q 10 | 1087.5742       | 544.2907                         | ---                                            | ---       |
|  | 1513.5673                        | 757.2873                                       | 1611.5442 | 806.2758        | 16 | P 9  | 959.5156        | 480.2615                         | ---                                            | ---       |
|  | 1628.5943                        | 814.8008                                       | 1726.5712 | 863.7892        | 17 | D 8  | 862.4629        | 431.7351                         | ---                                            | ---       |
|  | 1729.6420                        | 865.3246                                       | 1827.6189 | 914.3131        | 18 | T 7  | 747.4359        | 374.2216                         | ---                                            | ---       |
|  | 1842.7260                        | 921.8667                                       | 1940.7029 | 970.8551        | 19 | I 6  | 646.3883        | 323.6978                         | ---                                            | ---       |
|  | 1929.7581                        | 965.3827                                       | 2027.7350 | 1014.3711       | 20 | S 5  | 533.3042        | 267.1557                         | ---                                            | ---       |
|  | 2042.8421                        | 1021.9247                                      | 2140.8190 | 1070.9131       | 21 | I 4  | 446.2722        | 223.6397                         | ---                                            | ---       |
|  | 2113.8792                        | 1057.4433                                      | 2211.8561 | 1106.4317       | 22 | A 3  | 333.1881        | 167.0977                         | ---                                            | ---       |
|  | 2200.9113                        | 1100.9593                                      | 2298.8882 | 1149.9477       | 23 | S 2  | 262.1510        | 131.5791                         | ---                                            | ---       |
|  | ---                              | ---                                            | ---       | ---             | 24 | R 1  | 175.1190        | 88.0631                          | ---                                            | ---       |

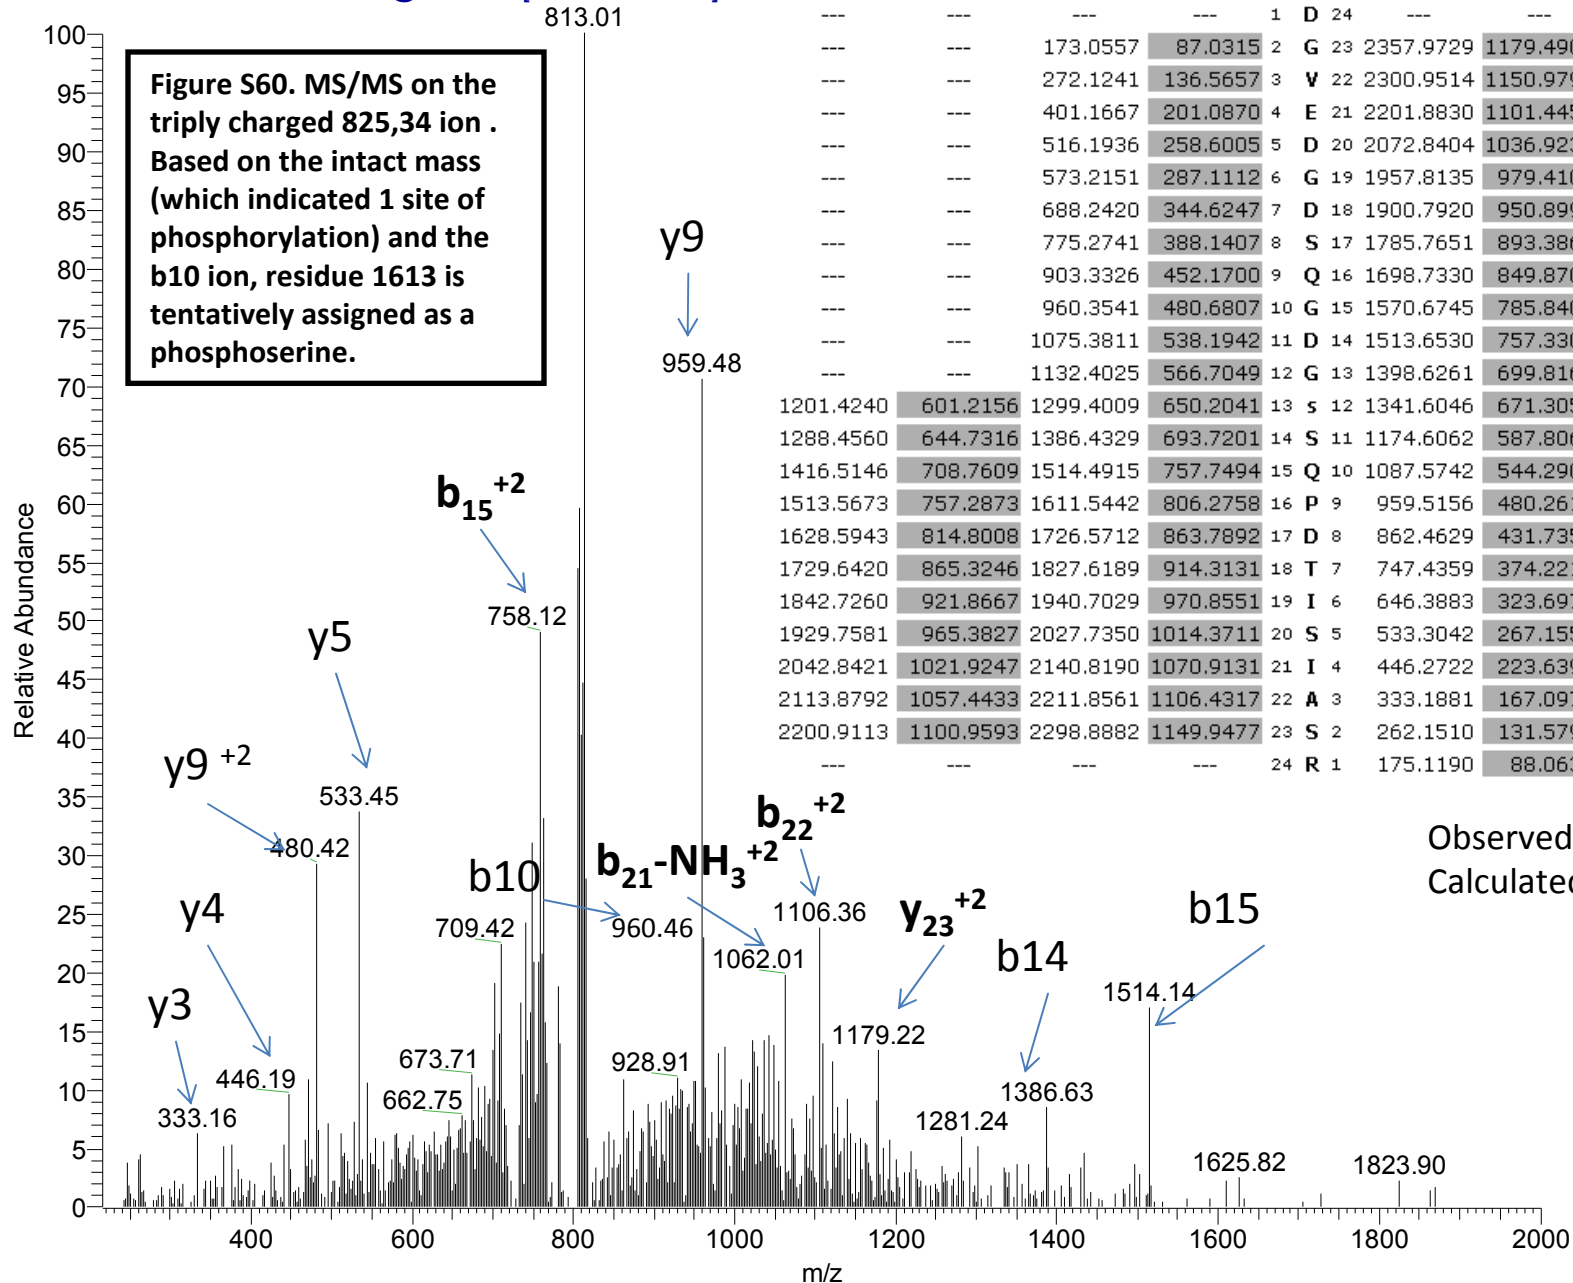

# Endogenous Kai7

# MS/MS of peptide DGVEDGDSQGDGSpSQPDTISIASR

OT09-3336 #2719 RT: 38.98 AV: 1 NL: 2.86E2  
 T: ITMS + c NSI d Full ms2 1237.50@cid35.00 [330.00-2000.00]

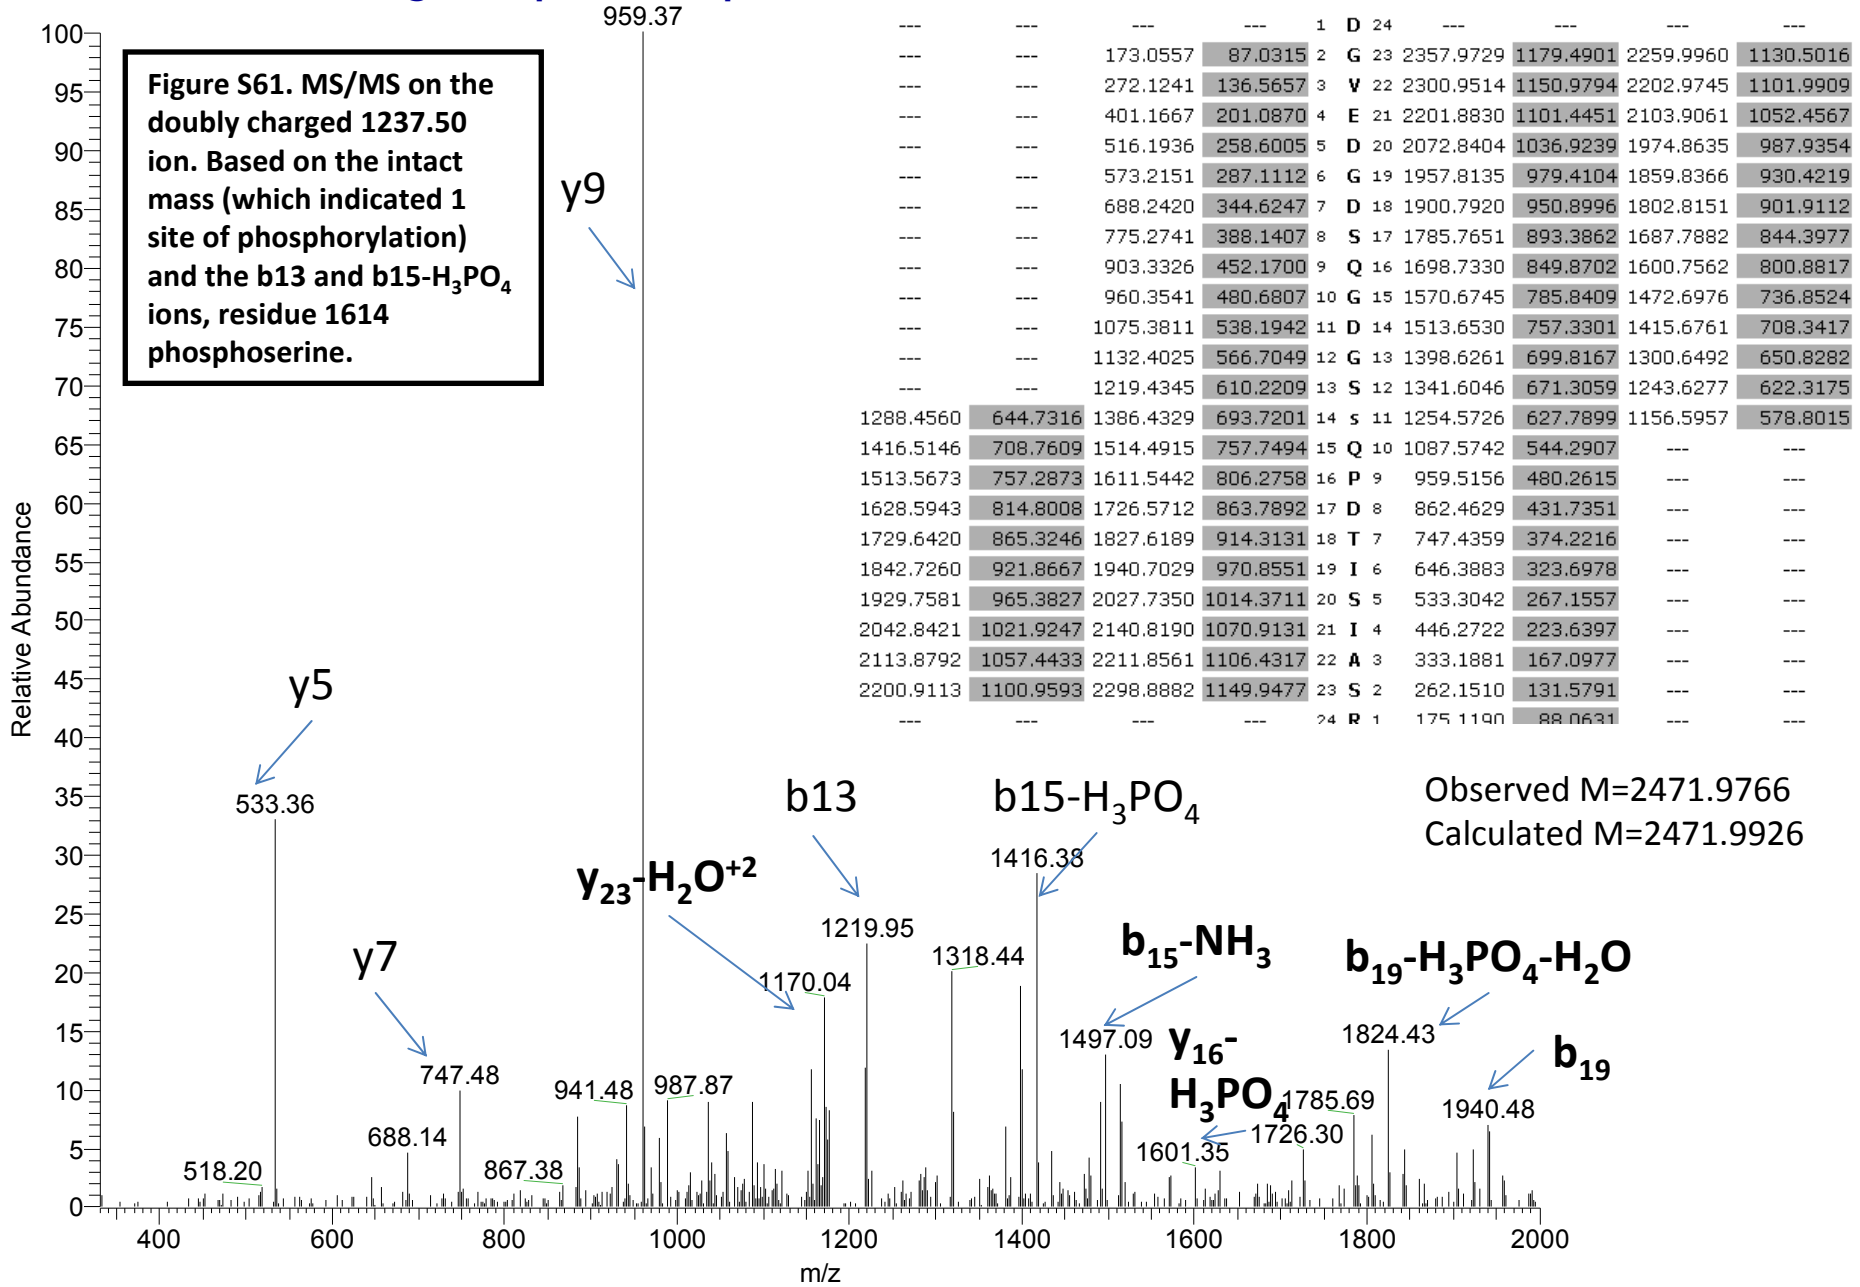

# MS/MS of peptide TSQNTVEpSDKGNLVPR

OT09-4224 #2579 RT: 35.43 AV: 1 NL: 8.08E2  
T: ITMS + c NSI d Full ms2 647.63@cid35.00 [165.00-1955.00]

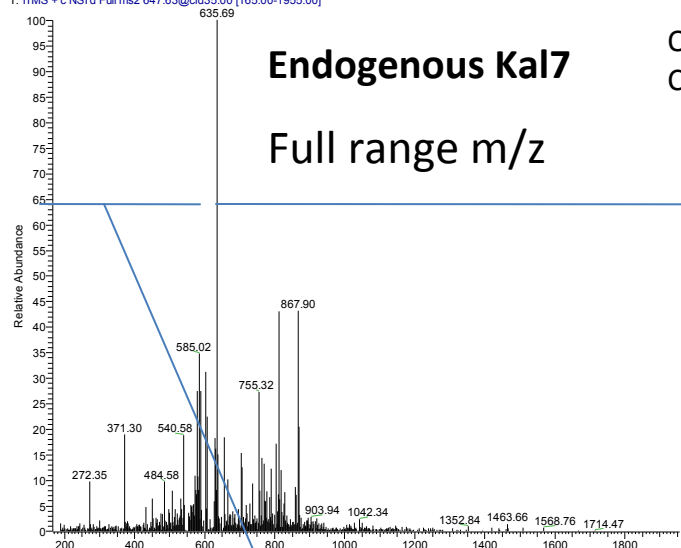

Observed M=1938.8669  
Calculated M=1938.8684

|     | b-H <sub>3</sub> PO <sub>4</sub> | b-H <sub>3</sub> PO <sub>4</sub> <sup>+2</sup> | b         | b <sup>+2</sup> | y      | y <sup>+2</sup> | y-H <sub>3</sub> PO <sub>4</sub> | y-H <sub>3</sub> PO <sub>4</sub> <sup>+2</sup> |          |
|-----|----------------------------------|------------------------------------------------|-----------|-----------------|--------|-----------------|----------------------------------|------------------------------------------------|----------|
| --- | ---                              | ---                                            | ---       | ---             | 1 T 17 | ---             | ---                              | ---                                            |          |
| --- | ---                              | ---                                            | 189.0870  | 95.0471         | 2 S 16 | 1838.8280       | 919.9176                         | 1740.8511                                      | 870.9292 |
| --- | ---                              | ---                                            | 317.1456  | 159.0764        | 3 Q 15 | 1751.7960       | 876.4016                         | 1653.8191                                      | 827.4132 |
| --- | ---                              | ---                                            | 431.1885  | 216.0979        | 4 N 14 | 1623.7374       | 812.3723                         | 1525.7605                                      | 763.3839 |
| --- | ---                              | ---                                            | 532.2362  | 266.6217        | 5 T 13 | 1509.6945       | 755.3509                         | 1411.7176                                      | 706.3624 |
| --- | ---                              | ---                                            | 631.3046  | 316.1559        | 6 V 12 | 1408.6468       | 704.8270                         | 1310.6699                                      | 655.8386 |
| --- | ---                              | ---                                            | 760.3472  | 380.6772        | 7 E 11 | 1309.5784       | 655.2928                         | 1211.6015                                      | 606.3044 |
| --- | ---                              | ---                                            | 829.3686  | 415.1880        | 8 s 10 | 1180.5358       | 590.7715                         | 1082.5589                                      | 541.7831 |
| --- | ---                              | ---                                            | 944.3956  | 472.7014        | 9 D 9  | 1013.5374       | 507.2724                         | ---                                            | ---      |
| --- | ---                              | ---                                            | 1072.4905 | 536.7489        | 10 K 8 | 898.5105        | 449.7589                         | ---                                            | ---      |
| --- | ---                              | ---                                            | 1187.5175 | 594.2624        | 11 D 7 | 770.4155        | 385.7114                         | ---                                            | ---      |
| --- | ---                              | ---                                            | 1244.5390 | 622.7731        | 12 G 6 | 655.3886        | 328.1979                         | ---                                            | ---      |
| --- | ---                              | ---                                            | 1358.5819 | 679.7946        | 13 N 5 | 598.3671        | 299.6872                         | ---                                            | ---      |
| --- | ---                              | ---                                            | 1471.6659 | 736.3366        | 14 L 4 | 484.3242        | 242.6657                         | ---                                            | ---      |
| --- | ---                              | ---                                            | 1570.7344 | 785.8708        | 15 V 3 | 371.2401        | 186.1237                         | ---                                            | ---      |
| --- | ---                              | ---                                            | 1667.7871 | 834.3972        | 16 P 2 | 272.1717        | 136.5895                         | ---                                            | ---      |
| --- | ---                              | ---                                            | ---       | ---             | 17 R 1 | 175.1190        | 88.0631                          | ---                                            | ---      |

OT09-4224 #2579 RT: 35.43 AV: 1 NL: 2.81E2  
T: ITMS + c NSI d Full ms2 647.63@cid35.00 [165.00-1955.00]

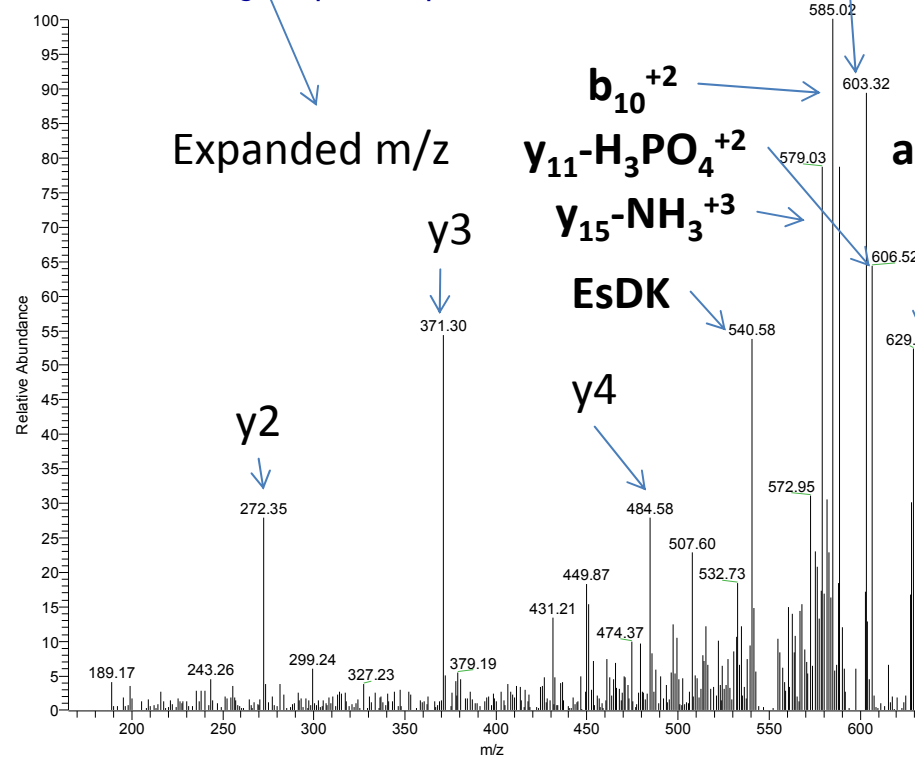

OT09-4224 #2579 RT: 35.43 AV: 1 NL: 3.48E2  
T: ITMS + c NSI d Full ms2 647.63@cid35.00 [165.00-1955.00]

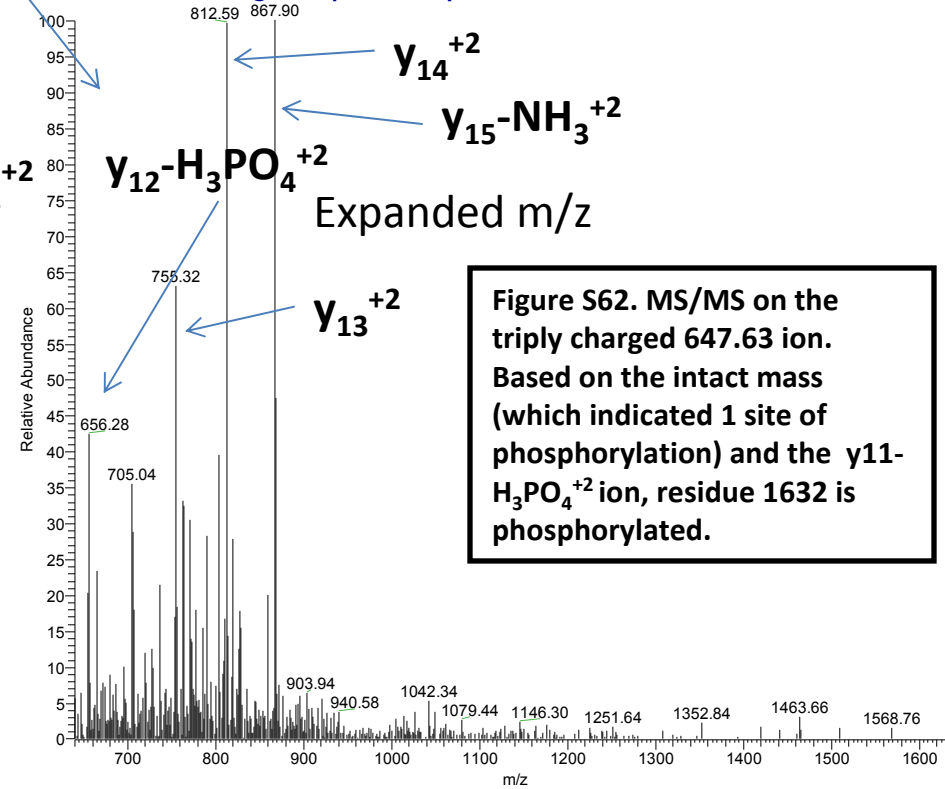

**Figure S62. MS/MS on the triply charged 647.63 ion. Based on the intact mass (which indicated 1 site of phosphorylation) and the y11-H<sub>3</sub>PO<sub>4</sub><sup>+2</sup> ion, residue 1632 is phosphorylated.**
